# Supplementary material
Source: Research Square preprint supplement (doi:10.21203/rs.3.rs-9409744/v1)
Supplement: Supplementary file 1 [file b1332bb32a37dad1e6040fc9.xlsx]

## Sheet: PvsC_Cluster_Keratinocytes_diff
Gene	Gene_name	p_val	avg_logFC	pct.1	pct.2	p_val_adj
ENSG00000244094	SPRR2F	0	4.34067389732865	0.54	0.041	0
ENSG00000124102	PI3	0	1.98233590891139	0.875	0.47	0
ENSG00000163216	SPRR2D	0	2.60792425664746	0.955	0.577	0
ENSG00000108244	KRT23	0	-2.01378	0.484	0.828	0
ENSG00000241794	SPRR2A	0	1.49501045068591	0.958	0.665	0
ENSG00000133710	SPINK5	1.58023909689663e-307	-2.43945	0.253	0.737	3.4013066321603e-303
ENSG00000160213	CSTB	1.06312469908374e-304	1.96472072633141	0.843	0.533	2.28826960230784e-300
ENSG00000205542	TMSB4X	1.2364180522906e-275	1.02213518794114	0.982	0.886	2.66126621575029e-271
ENSG00000034510	TMSB10	9.21087111998936e-274	0.816826752559745	0.981	0.901	1.98254789986651e-269
ENSG00000167996	FTH1	1.75744372952555e-260	0.818303521264305	0.976	0.813	3.7827218834308e-256
ENSG00000186832	KRT16	3.89985478529994e-250	1.39792574052221	0.747	0.341	8.3940474398796e-246
ENSG00000115009	CCL20	5.3887752851426e-247	-2.44288	0.268	0.708	1.15987999237409e-242
ENSG00000128422	KRT17	1.34239708995044e-244	1.04961861966465	0.904	0.764	2.88937549640932e-240
ENSG00000178372	CALML5	5.24205254371225e-239	-1.6853	0.582	0.869	1.12829938950863e-234
ENSG00000163993	S100P	4.21075255362807e-233	2.45528026704862	0.469	0.081	9.06322379642906e-229
ENSG00000142669	SH3BGRL3	4.66778355506506e-222	1.2213985877646	0.792	0.464	1.0046937323922e-217
ENSG00000159516	SPRR2G	4.63401462620387e-221	1.16783428502319	0.945	0.895	9.97425308144122e-217
ENSG00000185479	KRT6B	1.12843142905295e-220	1.46402418389796	0.611	0.203	2.42883580789357e-216
ENSG00000137331	IER3	3.57201853694387e-219	-1.7342	0.509	0.82	7.68841269891799e-215
ENSG00000100906	NFKBIA	1.69970597480086e-216	-1.66601	0.614	0.854	3.65844714016137e-212
ENSG00000166396	SERPINB7	4.32647249453281e-214	-1.77492	0.388	0.728	9.31229939723241e-210
ENSG00000205420	KRT6A	5.2511924441272e-214	1.49589924875915	0.672	0.279	1.13026666167394e-209
ENSG00000171711	DEFB4A	2.24423778078747e-213	3.57063927782495	0.35	0.028	4.83049739936695e-209
ENSG00000203783	PRR9	2.52930042520374e-200	2.73885994038054	0.429	0.089	5.44406623520854e-196
ENSG00000121552	CSTA	6.27454374945799e-198	-1.13294	0.858	0.948	1.35053279663334e-193
ENSG00000119125	GDA	1.47242143474383e-193	3.71580130132704	0.285	0.011	3.16923989614263e-189
ENSG00000184459	BPIFC	3.8319009086968e-193	-2.15803	0.134	0.532	8.24778351587899e-189
ENSG00000124429	POF1B	1.43583310474617e-192	-2.18098	0.15	0.547	3.09048717465565e-188
ENSG00000116717	GADD45A	1.21356386734083e-188	-1.55131	0.543	0.794	2.61207486806441e-184
ENSG00000188100	FAM25A	7.48987618206351e-180	1.28266804133467	0.825	0.584	1.61212094942735e-175
ENSG00000196805	SPRR2B	3.05003332379057e-177	0.826722998659148	0.895	0.74	6.56489172612682e-173
ENSG00000153048	CARHSP1	1.56655858218278e-176	2.10776142077689	0.445	0.115	3.37186069229021e-172
ENSG00000087086	FTL	4.71967964190563e-176	0.436742685862655	0.999	0.976	1.01586384612377e-171
ENSG00000135245	HILPDA	3.09104367595081e-174	3.37057634054953	0.281	0.018	6.65316240811652e-170
ENSG00000087074	PPP1R15A	1.16803412166317e-173	-1.01129	0.708	0.877	2.51407664346781e-169
ENSG00000175315	CST6	2.73036445581591e-171	-0.917926	0.761	0.918	5.87683645469817e-167
ENSG00000128383	APOBEC3A	1.92584897777812e-164	2.41417422097302	0.366	0.068	4.14519733976962e-160
ENSG00000197930	ERO1A	1.43970384573116e-162	1.71473816005616	0.543	0.216	3.09881855755175e-158
ENSG00000108107	RPL28	1.99115600400234e-162	0.614495132534368	0.934	0.835	4.28576418301463e-158
ENSG00000102144	PGK1	1.10758503023107e-156	1.55773741327534	0.495	0.169	2.38396601906935e-152
ENSG00000153802	TMPRSS11D	1.52757058051433e-154	1.87511366787351	0.404	0.098	3.28794291749904e-150
ENSG00000147403	RPL10	5.96169636069974e-153	0.606223453883659	0.938	0.777	1.28319552467701e-148
ENSG00000143546	S100A8	2.80598670579455e-148	0.782971130661436	0.972	0.849	6.03960578555218e-144
ENSG00000148671	ADIRF	1.62950712727789e-147	1.32788364261738	0.683	0.406	3.50735114075292e-143
ENSG00000119048	UBE2B	4.32632003558518e-147	-0.851005	0.655	0.805	9.31197124459354e-143
ENSG00000203785	SPRR2E	2.33705306906987e-146	0.693135618881803	0.984	0.964	5.030273025866e-142
ENSG00000109332	UBE2D3	4.91872285552943e-144	-0.746815	0.757	0.846	1.05870590742415e-139
ENSG00000105427	CNFN	4.09708996897579e-141	-0.810382	0.959	0.997	8.8185764492235e-137
ENSG00000110675	ELMOD1	5.58132207940878e-141	-3.28808	0.021	0.322	1.20132376437195e-136
ENSG00000034713	GABARAPL2	2.30961259803598e-139	-0.742056	0.791	0.871	4.97121015601264e-135
ENSG00000107165	TYRP1	7.89130196206282e-139	1.84026892146233	0.3	0.046	1.6985238343144e-134
ENSG00000105193	RPS16	1.8246429249788e-135	0.642390931558794	0.857	0.702	3.92736143172438e-131
ENSG00000034152	MAP2K3	2.58201028088293e-133	-1.35357	0.396	0.66	5.55751892857243e-129
ENSG00000124107	SLPI	1.11000543090198e-132	0.642152266633181	0.973	0.878	2.38917568947342e-128
ENSG00000127922	SEM1	1.50940958353376e-132	-0.876551	0.639	0.784	3.24885318759807e-128
ENSG00000197329	PELI1	3.55476825860857e-129	-1.65821	0.246	0.549	7.65128319982908e-125
ENSG00000160188	RSPH1	2.20196812921159e-127	-3.88328	0.024	0.303	4.73951620131502e-123
ENSG00000227507	LTB	4.30119521177532e-127	1.82671627381848	0.286	0.045	9.2578925738252e-123
ENSG00000143882	ATP6V1C2	9.6028333231116e-127	-1.63752	0.238	0.545	2.06691384446654e-122
ENSG00000169442	CD52	1.02086228734196e-126	1.63120847058357	0.325	0.066	2.19730398727484e-122
ENSG00000165949	IFI27	2.24701838725231e-126	0.636228723119579	0.753	0.475	4.83648237672186e-122
ENSG00000134333	LDHA	7.09842476060689e-125	1.20930703037241	0.602	0.31	1.52786494547303e-120
ENSG00000169242	EFNA1	1.16994419624376e-122	-1.91785	0.175	0.494	2.51818788799507e-118
ENSG00000154640	BTG3	3.67247157948098e-121	-1.80538	0.151	0.461	7.90462782767485e-117
ENSG00000111669	TPI1	1.62342247722982e-119	0.93300241006395	0.7	0.469	3.49425453998947e-115
ENSG00000170465	KRT6C	7.473254981011e-119	2.54096096999738	0.214	0.02	1.60854340211281e-114
ENSG00000177954	RPS27	1.17987728539731e-118	0.460372037731527	0.977	0.948	2.53956786908917e-114
ENSG00000150347	ARID5B	2.53693320206284e-117	-0.868166	0.609	0.756	5.46049502412005e-113
ENSG00000163221	S100A12	5.00425682005534e-117	2.21286313002234	0.34	0.094	1.07711623794871e-112
ENSG00000196154	S100A4	1.62955034722659e-116	1.07231420055981	0.472	0.168	3.50744416737052e-112
ENSG00000105640	RPL18A	3.04261074093942e-115	0.476066036927873	0.946	0.863	6.54891535879801e-111
ENSG00000204421	LY6G6C	7.18339634538638e-115	-2.34926	0.058	0.335	1.54615422938096e-110
ENSG00000186594	MIR22HG	1.1513294683619e-114	-1.32473	0.268	0.563	2.47812154770215e-110
ENSG00000132475	H3F3B	5.97898634242439e-112	-0.701018	0.772	0.882	1.28691702034343e-107
ENSG00000169429	CXCL8	7.18736257841234e-112	-1.71731	0.27	0.565	1.54700792137747e-107
ENSG00000243137	PSG4	2.3113299860485e-111	-2.36595	0.042	0.307	4.97490666197078e-107
ENSG00000171476	HOPX	3.44000071145888e-110	-1.0029	0.685	0.834	7.4042575313441e-106
ENSG00000185962	LCE3A	3.98601134907526e-110	3.06169746936517	0.189	0.013	8.57949082774958e-106
ENSG00000167526	RPL13	3.63018979830971e-109	0.414439171825837	0.942	0.847	7.81362052188182e-105
ENSG00000116044	NFE2L2	4.11585573856425e-109	-1.33348	0.302	0.561	8.8589678916857e-105
ENSG00000143631	FLG	7.52668706178834e-109	-3.13297	0.024	0.274	1.62004412317932e-104
ENSG00000130066	SAT1	1.03794439565448e-108	0.662985530864997	0.813	0.567	2.2340715172067e-104
ENSG00000145592	RPL37	1.5689369881545e-108	0.4178480457244	0.895	0.763	3.37697997330375e-104
ENSG00000266402	SNHG25	2.09789994822477e-108	0.949255329673896	0.358	0.1	4.515519848559e-104
ENSG00000109220	CHIC2	7.9723648470629e-108	-0.980807	0.502	0.691	1.71597180968182e-103
ENSG00000131051	RBM39	1.00987545153962e-107	-0.768018	0.653	0.781	2.17365592189389e-103
ENSG00000131196	NFATC1	1.52496139225269e-107	-2.71853	0.043	0.301	3.2823269006847e-103
ENSG00000126524	SBDS	1.39667799683142e-106	-0.858552	0.547	0.713	3.00620972037995e-102
ENSG00000174749	FAM241A	1.14636361242786e-105	-1.83848	0.08	0.351	2.46743303938973e-101
ENSG00000146278	PNRC1	5.113321826676e-105	-1.23753	0.525	0.709	1.10059138997374e-100
ENSG00000104825	NFKBIB	1.8008738438044e-104	-1.3058	0.308	0.562	3.8762008614046e-100
ENSG00000160862	AZGP1	2.21142683482731e-104	-1.68324	0.198	0.482	4.7598751192823e-100
ENSG00000159871	LYPD5	2.26264369708488e-104	-1.73044	0.142	0.421	4.8701142936055e-100
ENSG00000114648	KLHL18	1.50558593157247e-103	-1.48649	0.207	0.478	3.24062315911659e-99
NA	AC011473.4	2.07703004138884e-103	-2.10381	0.182	0.45	4.47059946108535e-99
ENSG00000204525	HLA-C	5.64300649893501e-103	0.960546879076522	0.697	0.457	1.21460071883077e-98
ENSG00000120215	MLANA	6.56128544453543e-103	1.31164946100302	0.303	0.072	1.41225107908181e-98
ENSG00000211772	TRBC2	1.28405517416221e-102	1.8165014606823	0.253	0.047	2.76380035686674e-98
ENSG00000130255	RPL36	1.71740328878643e-102	0.526587090652479	0.863	0.695	3.69653883878391e-98
ENSG00000109171	SLAIN2	6.24168046982326e-102	-1.32988	0.266	0.533	1.34345930432476e-97
ENSG00000113811	SELENOK	6.9826568197775e-102	-0.881949	0.563	0.729	1.50294705388891e-97
ENSG00000185825	BCAP31	2.99447698386954e-101	1.22852355183873	0.365	0.119	6.44531226008081e-97
ENSG00000116260	QSOX1	2.99504865456297e-101	1.49783491068658	0.495	0.263	6.44654272408134e-97
ENSG00000197956	S100A6	8.75542490557923e-101	0.499626245651628	0.682	0.397	1.88451765667687e-96
ENSG00000051523	CYBA	4.35262079077252e-100	1.27278358412346	0.369	0.118	9.36858099005877e-96
ENSG00000167767	KRT80	3.00007038710761e-99	-1.02162	0.515	0.705	6.45735150121042e-95
ENSG00000228474	OST4	3.16629703893662e-99	0.998105196095183	0.54	0.274	6.81513774660718e-95
ENSG00000167286	CD3D	4.57958252080354e-98	1.90535322708017	0.21	0.029	9.85709341777754e-94
ENSG00000005001	PRSS22	6.51158902529396e-98	-1.59598	0.461	0.689	1.40155442180427e-93
ENSG00000144655	CSRNP1	3.0572125524063e-97	-1.44046	0.21	0.475	6.58034429779933e-93
ENSG00000180879	SSR4	4.35911244751117e-97	1.1557665645667	0.488	0.236	9.38255363202304e-93
ENSG00000185966	LCE3E	5.71367697093781e-97	0.862187645078262	0.822	0.672	1.22981183122465e-92
ENSG00000232810	TNF	2.81913442375017e-96	-2.83069	0.033	0.266	6.06790493367987e-92
ENSG00000112306	RPS12	4.95249134827502e-96	0.321357744016251	0.982	0.927	1.06597423780271e-91
ENSG00000185633	NDUFA4L2	1.10602793525225e-95	1.44503189921863	0.331	0.1	2.38061452783695e-91
ENSG00000167754	KLK5	1.77077960836353e-95	-0.968616	0.461	0.683	3.81142602904167e-91
ENSG00000106615	RHEB	6.74286030235906e-95	-0.917594	0.481	0.671	1.45133325147976e-90
ENSG00000172551	MUCL1	7.15239612026218e-95	1.11459460876264	0.357	0.118	1.53948174092523e-90
ENSG00000273604	EPOP	1.08305370145135e-94	-3.20468	0.029	0.255	2.33116478700388e-90
ENSG00000096746	HNRNPH3	1.43769669570411e-94	-0.704735	0.619	0.762	3.09449836783352e-90
ENSG00000159685	CHCHD6	6.35768552743324e-94	2.21325951675267	0.173	0.016	1.36842823292473e-89
ENSG00000111640	GAPDH	9.20399880720789e-94	0.741347628079629	0.673	0.442	1.98106870326343e-89
ENSG00000198931	APRT	9.96538966277618e-94	0.850487088089459	0.348	0.105	2.14495047101595e-89
ENSG00000185088	RPS27L	5.25508053372379e-93	0.714065062352146	0.559	0.274	1.13110353407871e-88
ENSG00000204618	RNF39	1.08382150297562e-92	-1.17116	0.379	0.609	2.33281740300471e-88
ENSG00000101439	CST3	1.66863265791336e-92	0.734595135233003	0.389	0.135	3.59156493289272e-88
ENSG00000089356	FXYD3	1.27766419426593e-91	1.11388058158619	0.306	0.085	2.75004441173799e-87
ENSG00000120334	CENPL	1.02888128262706e-90	-1.89324	0.058	0.297	2.21456407272649e-86
ENSG00000198034	RPS4X	1.03336107301668e-90	0.682561134109284	0.791	0.586	2.22420637356111e-86
ENSG00000152137	HSPB8	1.17152279896594e-90	-1.22719	0.306	0.552	2.52158567249428e-86
ENSG00000104450	SPAG1	1.65513581171793e-90	-1.35733	0.137	0.399	3.56251432114168e-86
ENSG00000100592	DAAM1	2.99399525431123e-90	-1.22285	0.295	0.539	6.44427538537948e-86
ENSG00000119862	LGALSL	6.48602822717488e-90	-1.95507	0.091	0.338	1.39605271561712e-85
ENSG00000111716	LDHB	7.23312024833238e-90	2.02600893930621	0.19	0.025	1.55685680225106e-85
ENSG00000118503	TNFAIP3	1.69888919518535e-89	-1.86376	0.138	0.395	3.65668910371696e-85
ENSG00000126432	PRDX5	2.15313434003756e-89	1.0369965155984	0.425	0.179	4.63440635349684e-85
ENSG00000154582	ELOC	2.60506588716154e-89	-0.598695	0.717	0.825	5.60714381552649e-85
ENSG00000108518	PFN1	2.99550902814897e-89	0.727600243595625	0.695	0.448	6.44753363218785e-85
ENSG00000105889	STEAP1B	6.66921610512669e-89	1.38354464104769	0.301	0.091	1.43548207446747e-84
ENSG00000123136	DDX39A	1.61295291369473e-88	-0.982437	0.46	0.657	3.47171985143653e-84
ENSG00000211751	TRBC1	6.02272549830271e-88	2.14616582243975	0.192	0.027	1.29633143625468e-83
ENSG00000133641	C12orf29	7.68659575909426e-88	-1.16163	0.287	0.52	1.65446287118745e-83
ENSG00000050393	MCUR1	1.04510150173071e-87	-1.6429	0.291	0.525	2.24947647232517e-83
ENSG00000049283	EPN3	1.67449292196385e-87	-1.44746	0.231	0.481	3.60417856523499e-83
ENSG00000143774	GUK1	2.02206423638983e-87	0.83231722565586	0.744	0.594	4.35229106240547e-83
ENSG00000100664	EIF5	2.33902998195076e-87	-0.689494	0.632	0.757	5.03452813315082e-83
ENSG00000185022	MAFF	6.83966464731253e-87	-0.810499	0.587	0.717	1.47216941868755e-82
ENSG00000271503	CCL5	8.2689240141976e-87	2.06987209153357	0.222	0.042	1.77980320481589e-82
ENSG00000162244	RPL29	8.43343619968423e-87	0.486848990949043	0.845	0.719	1.81521280762003e-82
ENSG00000197756	RPL37A	1.17449878183671e-86	0.425411526014758	0.929	0.827	2.52799117802534e-82
ENSG00000104969	SGTA	1.33646180209054e-86	-1.35239	0.204	0.457	2.87660038281967e-82
ENSG00000265241	RBM8A	2.70972405025061e-86	-0.757093	0.553	0.705	5.83241004575941e-82
ENSG00000197279	ZNF165	3.28761377009053e-86	-1.50438	0.173	0.426	7.07625987874286e-82
ENSG00000103569	AQP9	1.03248472925538e-85	-3.56159	0.01	0.203	2.22232013124927e-81
ENSG00000111348	ARHGDIB	1.12596573288158e-85	1.72000189392409	0.234	0.049	2.42352864345432e-81
ENSG00000196172	ZNF681	3.2453102407627e-85	-2.53538	0.057	0.28	6.98520576221764e-81
ENSG00000189266	PNRC2	5.93783734124234e-85	-0.888131	0.515	0.674	1.278060109329e-80
ENSG00000170426	SDR9C7	6.09656313533462e-85	-1.66835	0.159	0.402	1.31222424924942e-80
ENSG00000180573	HIST1H2AC	6.71500614930856e-85	-1.14753	0.334	0.561	1.44533792357718e-80
ENSG00000118939	UCHL3	1.44718933691531e-84	-0.974885	0.368	0.575	3.11493032877652e-80
ENSG00000100097	LGALS1	1.95835958024391e-84	0.782213371146483	0.617	0.377	4.215173160517e-80
ENSG00000277734	TRAC	2.33748439585228e-84	2.02852693845385	0.21	0.038	5.03120141363244e-80
ENSG00000145425	RPS3A	2.70859526156972e-84	0.339757945609567	0.879	0.741	5.82998044100267e-80
ENSG00000240972	MIF	3.00994485482487e-84	1.67741333133804	0.423	0.206	6.47860530552505e-80
ENSG00000126368	NR1D1	4.15112926862663e-84	-1.27555	0.384	0.599	8.93489063779195e-80
ENSG00000117616	RSRP1	4.71632018239562e-84	-0.993928	0.409	0.627	1.01514075605883e-79
ENSG00000136490	LIMD2	7.0729754936975e-84	2.07907894689507	0.168	0.019	1.52238724526345e-79
ENSG00000118520	ARG1	1.18722224928158e-83	-2.49005	0.073	0.299	2.55537716935367e-79
ENSG00000163660	CCNL1	1.39999401829593e-83	-0.851338	0.656	0.76	3.01334712498017e-79
ENSG00000101558	VAPA	4.48651046258987e-83	-0.767811	0.537	0.686	9.65676511967843e-79
ENSG00000103056	SMPD3	6.98687765022964e-83	-1.32505	0.251	0.504	1.50385554543543e-78
ENSG00000105220	GPI	2.9417613975112e-82	1.74746470566735	0.258	0.068	6.3318472320031e-78
ENSG00000174738	NR1D2	3.10893579460166e-82	-1.24477	0.188	0.44	6.69167340430061e-78
ENSG00000177243	DEFB103B	5.01372544128512e-82	1.87319106900262	0.284	0.088	1.07915426398221e-77
ENSG00000135390	ATP5MC2	5.946551430237e-82	0.943400707350089	0.407	0.17	1.27993572984421e-77
ENSG00000122257	RBBP6	3.03242253859657e-81	-1.02408	0.38	0.598	6.52698627207525e-77
ENSG00000170144	HNRNPA3	5.98466830575921e-81	-0.809122	0.518	0.679	1.28814000613161e-76
ENSG00000130545	CRB3	6.57855429824211e-81	-1.20248	0.267	0.498	1.41596802715363e-76
ENSG00000162924	REL	7.74418861711543e-81	-1.46555	0.145	0.392	1.66685915794792e-76
ENSG00000145414	NAF1	1.70055084306561e-80	-2.0835	0.05	0.263	3.66026563461441e-76
ENSG00000165494	PCF11	1.91909357718316e-80	-0.918256	0.355	0.589	4.13065701552904e-76
ENSG00000196531	NACA	3.9201673782161e-80	-0.47346	0.787	0.856	8.43776826487233e-76
ENSG00000080166	DCT	4.68491294284351e-80	1.18641332611358	0.233	0.051	1.00838066181764e-75
ENSG00000130340	SNX9	6.93801937935467e-80	-1.21191	0.283	0.513	1.4933392912123e-75
ENSG00000161091	MFSD12	7.3354213671435e-80	0.976077865237545	0.509	0.265	1.57887609506397e-75
ENSG00000132965	ALOX5AP	7.52694770627071e-80	1.73244	0.179	0.026	1.62010022429771e-75
ENSG00000140988	RPS2	8.496284129315e-80	0.530159136003565	0.866	0.713	1.82874019599376e-75
ENSG00000197448	GSTK1	9.91673496343757e-80	1.52200277585509	0.208	0.04	2.1344780335303e-75
ENSG00000102962	CCL22	1.6517051740345e-79	1.01152862825512	0.39	0.163	3.55513021659185e-75
ENSG00000144674	GOLGA4	1.91897257312286e-79	-1.10067	0.232	0.476	4.13039656638964e-75
ENSG00000128016	ZFP36	2.0492283112407e-79	-1.47103	0.522	0.702	4.41075901711449e-75
ENSG00000171858	RPS21	3.56123458702936e-79	0.463674418597022	0.803	0.667	7.665201325122e-75
ENSG00000166710	B2M	5.3856379939423e-79	0.476245363230272	0.987	0.937	1.15920472181614e-74
ENSG00000054523	KIF1B	7.58726827505352e-79	-1.16399	0.188	0.438	1.63308362352252e-74
NA	AES	1.18721861084367e-78	1.55597473687957	0.25	0.065	2.55536933797992e-74
ENSG00000084110	HAL	1.43155344104334e-78	-1.38947	0.219	0.456	3.08127562650169e-74
NA	KIAA1468	2.27000746992938e-78	-1.33872	0.1	0.332	4.885964078276e-74
ENSG00000243449	C4orf48	2.32148187686672e-78	1.06862741062818	0.237	0.056	4.99675759176793e-74
ENSG00000158615	PPP1R15B	3.11931657946344e-78	-1.2955	0.205	0.444	6.71401700563711e-74
ENSG00000116560	SFPQ	6.23547640944306e-78	-0.725089	0.616	0.739	1.34212394236852e-73
ENSG00000010818	HIVEP2	4.08628568102354e-77	-1.46806	0.178	0.419	8.79532129983508e-73
ENSG00000083937	CHMP2B	4.64417307216637e-77	-0.818377	0.458	0.631	9.9961181205309e-73
ENSG00000117479	SLC19A2	5.65034010580009e-77	-2.12976	0.064	0.277	1.21617920437241e-72
ENSG00000135046	ANXA1	5.91003184814077e-77	0.762230937410341	0.671	0.464	1.27207525499382e-72
ENSG00000142676	RPL11	9.69119117063297e-77	0.405659023300437	0.865	0.72	2.08593198756704e-72
ENSG00000112096	SOD2	1.94180790055345e-76	-1.96987	0.18	0.419	4.17954732515125e-72
ENSG00000114019	AMOTL2	7.86269330554213e-76	-1.43289	0.142	0.377	1.69236610708489e-71
ENSG00000167995	BEST1	5.27941994632899e-75	1.68206051331193	0.176	0.028	1.13634234924785e-70
ENSG00000143256	PFDN2	8.99534947659878e-75	-0.653698	0.65	0.771	1.93615902134312e-70
ENSG00000173239	LIPM	9.84340050506075e-75	-1.38811	0.101	0.321	2.11869352470928e-70
ENSG00000085231	AK6	1.17106886828969e-74	-1.26704	0.144	0.378	2.52060863210672e-70
ENSG00000127955	GNAI1	1.64466806005113e-74	-1.80559	0.054	0.258	3.53998353245406e-70
ENSG00000002933	TMEM176A	2.09963179235953e-74	1.77799300838434	0.169	0.025	4.51924746987465e-70
ENSG00000116679	IVNS1ABP	2.31488755144608e-74	-1.10521	0.199	0.44	4.98256396573253e-70
ENSG00000163870	TPRA1	2.3805536923126e-74	-1.42941	0.201	0.431	5.12390376733364e-70
ENSG00000164587	RPS14	3.28695941161237e-74	0.241289520377902	0.905	0.788	7.07485143755446e-70
ENSG00000213741	RPS29	4.09653534603973e-74	0.503413495054795	0.93	0.855	8.81738267881592e-70
ENSG00000092199	HNRNPC	7.01725350519311e-74	-0.659339	0.611	0.729	1.51039364445776e-69
ENSG00000140941	MAP1LC3B	7.39960851739877e-74	-0.451672	0.774	0.861	1.59269173728491e-69
ENSG00000173926	2026-03-03	1.33256638148068e-73	-1.56307	0.118	0.339	2.86821587949901e-69
ENSG00000122042	UBL3	1.75575908792096e-73	-1.11085	0.419	0.61	3.77909586084108e-69
ENSG00000129451	KLK10	1.9653710858292e-73	0.90389728848564	0.612	0.437	4.23026472513877e-69
ENSG00000102471	NDFIP2	2.36732844984121e-73	-1.18297	0.216	0.443	5.09543775543821e-69
ENSG00000008294	SPAG9	5.50519367267658e-73	-0.932081	0.383	0.588	1.18493788610691e-68
ENSG00000115602	IL1RL1	5.9033509628982e-73	0.659480844411035	0.729	0.524	1.27063726125421e-68
ENSG00000164405	UQCRQ	6.83432167191873e-73	0.998266463524121	0.412	0.192	1.47101939666379e-68
ENSG00000169020	ATP5ME	1.03178891003868e-72	0.736085488125082	0.45	0.212	2.22082244996725e-68
ENSG00000008517	IL32	1.17669634891023e-72	1.37462157122731	0.377	0.158	2.53272122139437e-68
ENSG00000049759	NEDD4L	1.26889704598931e-72	-0.942036	0.39	0.597	2.73117400178738e-68
ENSG00000106052	TAX1BP1	1.31915800070129e-72	-0.852531	0.393	0.585	2.83935568070946e-68
ENSG00000147533	GOLGA7	1.53779521528558e-72	-0.989606	0.343	0.55	3.30995042138068e-68
ENSG00000246705	H2AFJ	1.57367235326913e-72	-0.743269	0.646	0.758	3.38717237317649e-68
ENSG00000171223	JUNB	1.61819762253679e-72	-1.17855	0.548	0.71	3.48300856274819e-68
ENSG00000162511	LAPTM5	3.8331852117791e-72	1.18017637352338	0.176	0.029	8.25054784983333e-68
ENSG00000137077	CCL21	5.31341115836944e-72	-7.05346	0.001	0.158	1.14365861772744e-67
ENSG00000070501	POLB	6.33574161846558e-72	-2.14398	0.033	0.219	1.36370502595853e-67
ENSG00000130779	CLIP1	6.94093691013528e-72	-1.10169	0.325	0.535	1.49396726053752e-67
ENSG00000140990	NDUFB10	8.13342012664371e-72	1.21748610134433	0.226	0.056	1.75063734805879e-67
ENSG00000144452	ABCA12	1.41785171527927e-71	-1.11041	0.282	0.498	3.0517840319671e-67
ENSG00000169379	ARL13B	2.05559691448084e-71	-2.21471	0.053	0.248	4.42446679872855e-67
ENSG00000108654	DDX5	2.09640704069482e-71	-0.716135	0.657	0.759	4.51230651439153e-67
ENSG00000163435	ELF3	2.5208889807116e-71	-1.38067	0.222	0.449	5.42596144208365e-67
ENSG00000198242	RPL23A	2.87634081266547e-71	0.567555859420211	0.835	0.721	6.19103596518117e-67
ENSG00000109320	NFKB1	3.18193054181947e-71	-1.57788	0.162	0.381	6.84878729821222e-67
ENSG00000113013	HSPA9	3.95119695446047e-71	-1.10034	0.284	0.5	8.50455632478073e-67
ENSG00000165813	CCDC186	5.51569894133012e-71	-0.957556	0.35	0.554	1.18719904013189e-66
ENSG00000198604	BAZ1A	7.06855458008473e-71	-1.14683	0.249	0.476	1.52143568781744e-66
ENSG00000134108	ARL8B	8.09864650655041e-71	-0.857703	0.442	0.613	1.74315267406991e-66
ENSG00000134317	GRHL1	8.43648577907621e-71	-1.01744	0.329	0.541	1.81586919908836e-66
ENSG00000109321	AREG	1.19377470640166e-70	-1.00834	0.433	0.627	2.56948067805894e-66
ENSG00000073737	DHRS9	3.73643611092336e-70	-0.839242	0.441	0.64	8.04230508515145e-66
ENSG00000134109	EDEM1	4.87541963631073e-70	-1.25074	0.26	0.475	1.04938532251952e-65
ENSG00000089048	ESF1	4.97138578083062e-70	-1.43352	0.084	0.296	1.07004107546598e-65
ENSG00000143217	NECTIN4	5.25678060266115e-70	-1.14406	0.263	0.486	1.13146945691679e-65
ENSG00000163743	RCHY1	1.30457887370111e-69	-1.16274	0.167	0.393	2.80797556775427e-65
ENSG00000135940	COX5B	1.61498470231915e-69	0.77886097387223	0.527	0.312	3.47609307327175e-65
ENSG00000101421	CHMP4B	2.77021045160777e-69	-0.930037	0.391	0.577	5.96260097604056e-65
ENSG00000115520	COQ10B	2.95801665543358e-69	-1.04663	0.241	0.46	6.36683504915524e-65
ENSG00000164949	GEM	4.1814725653335e-69	-2.20239	0.046	0.235	9.00020154962383e-65
ENSG00000119844	AFTPH	5.16237390692623e-69	-1.17485	0.159	0.389	1.1111493597268e-64
ENSG00000119632	IFI27L2	6.20911014919561e-69	1.24111777070464	0.259	0.079	1.33644886851286e-64
ENSG00000143398	PIP5K1A	7.33213996537036e-69	-1.10044	0.256	0.477	1.57816980614632e-64
ENSG00000011600	TYROBP	3.14295670752501e-68	0.429881968996294	0.365	0.142	6.76490001727683e-64
ENSG00000152795	HNRNPDL	3.28800136962983e-68	-0.591641	0.647	0.757	7.07709414799124e-64
ENSG00000118402	ELOVL4	4.32302346762248e-68	-0.920841	0.482	0.645	9.30487571171063e-64
ENSG00000197953	AADACL2	5.08334964282391e-68	-3.79395	0.003	0.156	1.09414017712142e-63
ENSG00000164733	CTSB	6.30530169160607e-68	0.821724696694109	0.515	0.302	1.35715313610129e-63
ENSG00000091527	CDV3	7.11426775114207e-68	-1.05584	0.203	0.435	1.53127499075582e-63
ENSG00000176797	DEFB103A	7.82508987132571e-68	1.73996553407977	0.257	0.084	1.68427234390415e-63
ENSG00000149273	RPS3	1.17239068679401e-67	0.372061589588502	0.86	0.748	2.52345371425543e-63
ENSG00000125148	MT2A	1.50055652108102e-67	-0.468312	0.648	0.316	3.22979785597479e-63
ENSG00000173812	EIF1	1.86195256003639e-67	-0.309407	0.958	0.975	4.00766669022232e-63
ENSG00000167232	ZNF91	2.12949017214449e-67	-1.61604	0.065	0.262	4.58351464652381e-63
ENSG00000166441	RPL27A	4.45865805660778e-67	0.43931072516187	0.885	0.825	9.5968156010426e-63
ENSG00000196683	TOMM7	4.61870661079155e-67	0.517599562385264	0.538	0.304	9.94130410906774e-63
ENSG00000130731	METTL26	7.54798105670178e-67	1.21571834470584	0.19	0.041	1.62462744264449e-62
ENSG00000184060	ADAP2	2.34681476418916e-66	-1.64713	0.097	0.296	5.05128409844074e-62
ENSG00000184983	NDUFA6	2.64950990592934e-66	-0.813488	0.432	0.6	5.70280512152231e-62
ENSG00000185215	TNFAIP2	3.02543737134773e-66	-2.32594	0.102	0.309	6.51195139808886e-62
ENSG00000231500	RPS18	3.27264080936027e-66	0.223043184545145	0.953	0.882	7.04403207806705e-62
ENSG00000115128	SF3B6	3.38361760241038e-66	-0.750177	0.523	0.665	7.2828985274281e-62
ENSG00000099860	GADD45B	3.41666755800894e-66	-0.699298	0.841	0.931	7.35403525185843e-62
ENSG00000129460	NGDN	3.8508877798203e-66	-1.00856	0.171	0.399	8.28865085728522e-62
ENSG00000104419	NDRG1	1.01697702390553e-65	1.27543028545044	0.302	0.113	2.18894134625427e-61
ENSG00000118181	RPS25	1.0877692161679e-65	0.45669769534787	0.849	0.776	2.34131446087978e-61
ENSG00000163558	PRKCI	1.32145079239965e-65	-1.19743	0.142	0.359	2.84429068556101e-61
ENSG00000006652	IFRD1	2.78849624359397e-65	-0.77349	0.483	0.647	6.00195931471167e-61
ENSG00000062194	GPBP1	3.43009765417928e-65	-1.00618	0.31	0.52	7.38294219085549e-61
ENSG00000163659	TIPARP	4.37406289642744e-65	-1.3274	0.196	0.408	9.41473297827042e-61
ENSG00000138326	RPS24	6.52972525424407e-65	0.346973158725018	0.824	0.669	1.40545806372349e-60
ENSG00000115828	QPCT	6.77528408090619e-65	-1.42797	0.134	0.339	1.45831214557425e-60
ENSG00000008405	CRY1	7.55117793339851e-65	-0.905959	0.214	0.444	1.62531553838469e-60
ENSG00000155090	KLF10	7.58256908179228e-65	-1.10143	0.291	0.508	1.63207216916497e-60
ENSG00000187605	TET3	2.39180856989678e-64	-1.74859	0.052	0.237	5.14812876584584e-60
ENSG00000110660	SLC35F2	4.64450297732661e-64	-1.69025	0.044	0.221	9.9968282083978e-60
ENSG00000112972	HMGCS1	5.01513526855234e-64	-0.941037	0.37	0.566	1.0794577152032e-59
ENSG00000104064	GABPB1	6.60741387178676e-64	-1.32018	0.087	0.288	1.42217976176338e-59
ENSG00000166200	COPS2	7.35578494555587e-64	-0.929604	0.208	0.425	1.58325915168144e-59
ENSG00000178719	GRINA	8.08722382356127e-64	1.56917463782522	0.161	0.029	1.74069405578333e-59
ENSG00000198918	RPL39	1.12086619521437e-63	0.352701736551188	0.886	0.81	2.41255239857941e-59
ENSG00000146232	NFKBIE	1.16820745633891e-63	-2.25448	0.049	0.226	2.51444972902387e-59
ENSG00000102879	CORO1A	1.39892633667758e-63	1.82062188559705	0.189	0.044	3.01104904706482e-59
ENSG00000135047	CTSL	2.77581456335239e-63	1.00560144609276	0.392	0.192	5.97466326615967e-59
ENSG00000136758	YME1L1	3.57142270266802e-63	-1.07205	0.208	0.426	7.68713022522264e-59
ENSG00000117410	ATP6V0B	3.99254763341905e-63	-0.702971	0.507	0.652	8.59355952617117e-59
ENSG00000153922	CHD1	5.48554553592488e-63	-1.03797	0.155	0.373	1.18070882115247e-58
ENSG00000157557	ETS2	5.50979761980271e-63	-1.24879	0.159	0.374	1.18592883968634e-58
ENSG00000273136	NBPF26	5.57498646993928e-63	-1.41928	0.15	0.354	1.19996008778973e-58
ENSG00000155097	ATP6V1C1	6.53827530547224e-63	-1.03621	0.23	0.448	1.40729837674984e-58
ENSG00000123091	RNF11	1.07500947588193e-62	-0.882446	0.373	0.554	2.31385039588826e-58
ENSG00000204628	RACK1	1.61985110602803e-62	0.631518273594424	0.648	0.455	3.48656752061474e-58
ENSG00000178913	TAF7	2.1219529366928e-62	-0.79801	0.392	0.578	4.56729150093758e-58
ENSG00000163874	ZC3H12A	2.22250153597276e-62	-1.62767	0.155	0.359	4.78371230602776e-58
ENSG00000146457	WTAP	2.24912194810483e-62	-0.956046	0.364	0.565	4.84101008110083e-58
ENSG00000068745	IP6K2	2.29909953098409e-62	-0.848074	0.307	0.511	4.94858183049016e-58
ENSG00000101160	CTSZ	2.57412619127843e-62	1.36164096786515	0.193	0.047	5.5405492141077e-58
ENSG00000054148	PHPT1	2.86801753163913e-62	0.934673838418445	0.228	0.066	6.17312093510006e-58
ENSG00000186468	RPS23	3.44730418036933e-62	0.311998971732032	0.86	0.722	7.41997751782695e-58
ENSG00000168028	RPSA	4.81420330631686e-62	0.602647083190987	0.604	0.4	1.03620911965164e-57
ENSG00000277969	AC006449.6	4.85773769908927e-62	-2.24982	0.026	0.187	1.04557946235197e-57
ENSG00000117984	CTSD	5.83801667415069e-62	0.817893311822857	0.504	0.3	1.25657470894419e-57
ENSG00000113240	CLK4	1.58839712535672e-61	-1.3967	0.088	0.282	3.4188659726178e-57
ENSG00000168685	IL7R	1.58870090911849e-61	1.67447101547695	0.167	0.033	3.41951983678663e-57
ENSG00000105835	NAMPT	2.83048648280823e-61	-1.06495	0.371	0.546	6.09233910559644e-57
ENSG00000052802	MSMO1	5.24128332707775e-61	-1.13152	0.155	0.363	1.12813382332022e-56
ENSG00000010438	PRSS3	1.00951390851134e-60	-0.946802	0.436	0.591	2.1728777366798e-56
ENSG00000121931	LRIF1	1.06033927679264e-60	-1.04544	0.276	0.48	2.28227425936847e-56
ENSG00000132680	KHDC4	1.22430583065787e-60	-0.794346	0.355	0.547	2.635195869908e-56
ENSG00000107372	ZFAND5	1.4244086370901e-60	-0.775323	0.509	0.651	3.06589715047273e-56
ENSG00000178449	COX14	1.65766635459079e-60	1.15761849779739	0.183	0.042	3.56796106162122e-56
ENSG00000092148	HECTD1	2.37835610034631e-60	-0.788999	0.485	0.636	5.1191736703854e-56
ENSG00000142541	RPL13A	2.93038631145988e-60	0.21406706107145	0.949	0.895	6.30736349678626e-56
ENSG00000109475	RPL34	3.14680152426097e-60	0.357252059967742	0.91	0.838	6.77317560081932e-56
ENSG00000181163	NPM1	4.57156618502092e-60	-0.738734	0.621	0.741	9.83983905663902e-56
ENSG00000197747	S100A10	4.68463344705736e-60	0.586154063434675	0.653	0.433	1.00832050314463e-55
ENSG00000142089	IFITM3	4.69938157714649e-60	0.562095772700632	0.33	0.129	1.01149489066501e-55
ENSG00000187098	MITF	6.88755287589953e-60	-1.48399	0.058	0.238	1.48247688100861e-55
ENSG00000130311	DDA1	1.23844695742193e-59	-1.08346	0.177	0.383	2.66563323115495e-55
ENSG00000164181	ELOVL7	1.34538531639468e-59	-1.183	0.193	0.398	2.89580735500791e-55
ENSG00000139289	PHLDA1	1.42878909136946e-59	-1.1516	0.271	0.472	3.07532564026364e-55
ENSG00000099341	PSMD8	1.64796326922553e-59	-0.596505	0.595	0.69	3.54707614068104e-55
ENSG00000213654	GPSM3	1.72801734133814e-59	1.46749068442332	0.168	0.035	3.71938452549622e-55
ENSG00000102908	NFAT5	1.78659535317818e-59	-1.08568	0.223	0.432	3.84546783818072e-55
ENSG00000144713	RPL32	1.86333329690495e-59	0.311132428611018	0.909	0.866	4.01063858825822e-55
ENSG00000095209	TMEM38B	2.04553107499465e-59	-1.36916	0.065	0.247	4.40280108581848e-55
ENSG00000196611	MMP1	2.16717377748379e-59	1.31737117831187	0.153	0.028	4.66462483865611e-55
ENSG00000114062	UBE3A	2.21232626110275e-59	-1.15338	0.114	0.315	4.76181104439755e-55
ENSG00000113742	CPEB4	2.65496968996482e-59	-0.76878	0.425	0.612	5.71455676068028e-55
ENSG00000075618	FSCN1	3.13128223903148e-59	0.84238940996833	0.403	0.2	6.73977189129135e-55
ENSG00000134058	CDK7	3.95692864167486e-59	-1.13448	0.16	0.363	8.51689320834098e-55
ENSG00000140264	SERF2	4.02663477466732e-59	0.556484624622033	0.774	0.64	8.66692868899393e-55
ENSG00000187840	EIF4EBP1	4.9277104760305e-59	0.993540673279087	0.172	0.037	1.0606404028608e-54
ENSG00000187837	HIST1H1C	5.39274368084259e-59	1.09958665705396	0.416	0.217	1.16073414986456e-54
ENSG00000047365	ARAP2	5.93650318720243e-59	-0.838784	0.323	0.529	1.27777294601345e-54
ENSG00000108953	YWHAE	6.03056290971952e-59	-0.586265	0.602	0.702	1.29801836068803e-54
ENSG00000171735	CAMTA1	6.75985807883243e-59	-0.718035	0.489	0.631	1.45499185288789e-54
ENSG00000162585	FAAP20	8.59564296520747e-59	1.26630721004591	0.177	0.041	1.85012619183126e-54
ENSG00000197084	LCE1C	1.06136379125768e-58	-1.6718	0.367	0.582	2.28447942430303e-54
ENSG00000079385	CEACAM1	1.5444966355234e-58	1.48944694801466	0.258	0.094	3.32437455830057e-54
ENSG00000100316	RPL3	1.88166349856983e-58	0.29935115362061	0.803	0.638	4.05009251432171e-54
ENSG00000093134	VNN3	1.97057833911678e-58	1.44258421133201	0.197	0.052	4.24147281711496e-54
ENSG00000070081	NUCB2	2.14269555427254e-58	-0.942059	0.382	0.552	4.61193791101622e-54
ENSG00000139372	TDG	2.16793157709922e-58	-1.10307	0.122	0.328	4.66625592654835e-54
ENSG00000167755	KLK6	3.6181207565322e-58	0.739397178354981	0.525	0.31	7.78764311635992e-54
ENSG00000108010	GLRX3	3.95643285134341e-58	-0.808703	0.287	0.488	8.51582606923155e-54
ENSG00000173674	EIF1AX	4.96975969382611e-58	-0.816637	0.456	0.61	1.06969107649913e-53
ENSG00000198900	TOP1	5.10053021107999e-58	-0.605952	0.573	0.707	1.09783812263286e-53
ENSG00000140263	SORD	5.71290106991838e-58	-2.62572	0.04	0.2	1.22964482628923e-53
ENSG00000137409	MTCH1	6.28642129029199e-58	-0.803732	0.416	0.584	1.35308931852245e-53
ENSG00000205076	LGALS7	1.17530988336152e-57	0.435277675734989	0.224	0.065	2.52973699294733e-53
ENSG00000171314	PGAM1	1.18743509746331e-57	0.944848666449798	0.457	0.276	2.55583530378003e-53
ENSG00000127184	COX7C	1.24589362708394e-57	0.682433816569119	0.636	0.465	2.68166144293548e-53
ENSG00000010244	ZNF207	1.36370101074876e-57	-0.604461	0.583	0.696	2.93523005553562e-53
ENSG00000136950	ARPC5L	1.72227463383214e-57	-0.789765	0.337	0.529	3.7070239218603e-53
ENSG00000134070	IRAK2	1.75786179941368e-57	-1.89533	0.051	0.217	3.78362173705801e-53
ENSG00000124209	RAB22A	1.77587965705418e-57	-1.03236	0.189	0.394	3.82240337384342e-53
ENSG00000112851	ERBIN	2.34204680713208e-57	-1.01743	0.246	0.455	5.04102154767109e-53
ENSG00000168703	WFDC12	4.94912466323443e-57	0.861006265001903	0.257	0.093	1.06524959251458e-52
ENSG00000132824	SERINC3	5.55922224654895e-57	-0.897042	0.418	0.591	1.1965669963472e-52
ENSG00000075785	RAB7A	7.27955800932957e-57	-0.445321	0.709	0.801	1.5668520659281e-52
ENSG00000271383	NBPF19	9.12547835214368e-57	-1.175	0.126	0.32	1.96416796051541e-52
ENSG00000197958	RPL12	1.31644919954628e-56	0.218737647770171	0.78	0.63	2.83352525710342e-52
ENSG00000149289	ZC3H12C	1.39936673593667e-56	-2.09518	0.032	0.186	3.0119969624301e-52
ENSG00000134709	HOOK1	1.39964804807781e-56	-1.02488	0.187	0.391	3.01260245868268e-52
ENSG00000151090	THRB	1.627952810063e-56	-1.66622	0.068	0.242	3.50400562837959e-52
ENSG00000166348	USP54	3.81344177253279e-56	-2.41539	0.022	0.168	8.20805207119957e-52
ENSG00000103187	COTL1	5.79610946904381e-56	1.16687460982949	0.401	0.215	1.24755460211699e-51
ENSG00000138398	PPIG	6.01697301213371e-56	-0.932496	0.231	0.434	1.29509327113166e-51
ENSG00000127540	UQCR11	6.90004174215814e-56	0.800999454818474	0.478	0.292	1.48516498458212e-51
ENSG00000184292	TACSTD2	8.12865429861072e-56	-0.567052	0.736	0.831	1.74961155123297e-51
ENSG00000019582	CD74	8.493488584003e-56	0.304190706518813	0.744	0.582	1.82813848282081e-51
ENSG00000136942	RPL35	8.66557785271786e-56	0.265939504385677	0.861	0.782	1.86517897701899e-51
ENSG00000137818	RPLP1	1.09322090857968e-55	-0.0803682	0.994	0.956	2.3530486836269e-51
ENSG00000148362	PAXX	1.16571917330449e-55	1.64976171107874	0.161	0.036	2.50909394862058e-51
ENSG00000149925	ALDOA	1.41000895580872e-55	1.78967804840057	0.291	0.129	3.0349032764827e-51
ENSG00000136603	SKIL	2.03168167558559e-55	-0.945053	0.293	0.485	4.37299163853041e-51
ENSG00000060138	YBX3	2.07602201641879e-55	-1.0096	0.243	0.441	4.46842978813981e-51
ENSG00000109270	LAMTOR3	2.16899441887249e-55	-1.15023	0.275	0.46	4.66854358718115e-51
ENSG00000026508	CD44	2.44723554878018e-55	0.845522037384403	0.266	0.096	5.26742979519445e-51
ENSG00000135604	STX11	2.46770445634888e-55	-1.53073	0.078	0.253	5.31148707184533e-51
ENSG00000136522	MRPL47	2.98065986372661e-55	-0.881376	0.254	0.449	6.41557229068516e-51
ENSG00000110768	GTF2H1	3.27185454130922e-55	-0.967916	0.191	0.396	7.04233971471397e-51
ENSG00000075624	ACTB	5.13959953310122e-55	0.333152003132068	0.952	0.906	1.10624740350471e-50
ENSG00000217128	FNIP1	5.98922032064889e-55	-0.804142	0.315	0.518	1.28911978181647e-50
ENSG00000197728	RPS26	6.73147451135201e-55	-0.667775	0.617	0.745	1.44888257382341e-50
ENSG00000187479	C11orf96	8.92146960535705e-55	-1.74475	0.056	0.223	1.92025711785705e-50
ENSG00000261644	AC007728.2	1.07593627644493e-54	-1.47914	0.063	0.234	2.31584524142007e-50
ENSG00000064601	CTSA	1.15067069661475e-54	-0.965146	0.278	0.469	2.47670360739359e-50
ENSG00000223865	HLA-DPB1	1.54298655532242e-54	1.03682344738057	0.427	0.23	3.32112426167598e-50
ENSG00000065548	ZC3H15	1.61487442521016e-54	-0.91031	0.247	0.442	3.47585571282234e-50
ENSG00000109534	GAR1	1.66335958369828e-54	-1.17833	0.072	0.248	3.58021516795218e-50
ENSG00000148634	HERC4	2.18944381456002e-54	-0.64972	0.555	0.685	4.71255886645898e-50
ENSG00000131143	COX4I1	2.19509899861967e-54	0.538402132849134	0.643	0.481	4.72473108462897e-50
ENSG00000162695	SLC30A7	2.44529117088861e-54	-1.14445	0.098	0.281	5.26324471622064e-50
ENSG00000111615	KRR1	2.77070859912066e-54	-1.10452	0.135	0.326	5.96367318874731e-50
ENSG00000099795	NDUFB7	3.37173556318065e-54	0.883541449534135	0.264	0.097	7.25732362619003e-50
ENSG00000152082	MZT2B	3.45901450581789e-54	1.07966408341678	0.245	0.087	7.44518282232242e-50
NA	KIAA1551	3.49580633938433e-54	0.807966215343178	0.502	0.319	7.52437356489084e-50
ENSG00000159455	LCE2B	3.5313759288473e-54	-2.45218	0.092	0.264	7.60093354925093e-50
ENSG00000198755	RPL10A	3.86304352922127e-54	0.373184976491778	0.769	0.63	8.31481489229586e-50
ENSG00000164463	CREBRF	6.05916298753016e-54	-0.743606	0.405	0.585	1.30417424143599e-49
ENSG00000113161	HMGCR	7.82940206504611e-54	-1.47434	0.115	0.296	1.68520050048053e-49
ENSG00000006015	REX1BD	9.80472917083854e-54	1.21608628089745	0.167	0.039	2.11036990673129e-49
ENSG00000183878	UTY	1.31150543103303e-53	-1.40667	0.049	0.215	2.8228842897555e-49
ENSG00000067048	DDX3Y	1.8142299669178e-53	-1.05464	0.083	0.268	3.90494858079388e-49
ENSG00000151694	ADAM17	2.09098497092515e-53	-1.1858	0.132	0.32	4.50063605141928e-49
ENSG00000137776	SLTM	2.15258169399682e-53	-0.801086	0.241	0.437	4.63321683815875e-49
ENSG00000185043	CIB1	2.31443602467817e-53	1.34567281397799	0.158	0.035	4.98159209951728e-49
ENSG00000108239	TBC1D12	2.41082489954413e-53	-2.27023	0.022	0.163	5.18905951377878e-49
ENSG00000159208	CIART	2.53909534397866e-53	-1.30928	0.102	0.283	5.46514881837967e-49
ENSG00000134884	ARGLU1	2.67457879439725e-53	-0.730712	0.305	0.506	5.75676339706064e-49
ENSG00000100300	TSPO	2.79243000346214e-53	0.599957810931404	0.38	0.184	6.01042633945192e-49
ENSG00000182154	MRPL41	2.899289294002e-53	0.898382723663707	0.298	0.123	6.24043027640991e-49
ENSG00000115286	NDUFS7	3.07237796118741e-53	1.14716470034431	0.206	0.063	6.61298632365979e-49
ENSG00000122566	HNRNPA2B1	3.38700817264425e-53	-0.772129	0.578	0.7	7.29019639079948e-49
ENSG00000226742	HSBP1L1	3.77509319538795e-53	-0.844419	0.361	0.539	8.12551059375302e-49
ENSG00000088726	TMEM40	5.71585163018295e-53	-0.356106	0.802	0.862	1.23027990488058e-48
ENSG00000154803	FLCN	8.38686524803595e-53	-0.863402	0.298	0.496	1.80518887598726e-48
ENSG00000143621	ILF2	9.33525353770295e-53	-0.847763	0.265	0.466	2.00931997145518e-48
ENSG00000147676	MAL2	9.50989917143139e-53	-0.869905	0.168	0.366	2.04691069765889e-48
ENSG00000167491	GATAD2A	9.51910676123731e-53	-1.0765	0.187	0.388	2.04889253928872e-48
ENSG00000119986	AVPI1	1.00665356696152e-52	-0.675577	0.554	0.699	2.16672113752798e-48
ENSG00000071082	RPL31	1.14416632475893e-52	0.35891970963672	0.879	0.817	2.46270359741113e-48
ENSG00000162642	C1orf52	1.18716373726407e-52	-0.876889	0.199	0.396	2.55525122808718e-48
ENSG00000100650	SRSF5	1.54515129048464e-52	-0.529848	0.671	0.741	3.32578363763913e-48
ENSG00000134186	PRPF38B	1.57097224800508e-52	-0.927436	0.335	0.516	3.38136066660613e-48
ENSG00000048405	ZNF800	1.74576426283222e-52	-1.27157	0.073	0.243	3.75758299932008e-48
ENSG00000099624	ATP5F1D	1.99528822636825e-52	0.753360541005547	0.315	0.138	4.29465837843502e-48
ENSG00000114541	FRMD4B	2.36515233003466e-52	-1.39775	0.114	0.291	5.09075387516661e-48
ENSG00000165997	ARL5B	3.17705565745389e-52	-0.958207	0.396	0.561	6.83829459710376e-48
ENSG00000131174	COX7B	3.26480684225621e-52	-0.436386	0.725	0.803	7.02717024727226e-48
ENSG00000177606	JUN	3.31930295579047e-52	-0.763828	0.5	0.665	7.1444676820434e-48
ENSG00000012822	CALCOCO1	3.31950712648446e-52	-0.780971	0.33	0.528	7.14490713904516e-48
ENSG00000130338	TULP4	4.4485251065308e-52	-1.07514	0.157	0.349	9.5750054392969e-48
ENSG00000105656	ELL	6.77134610664739e-52	-1.11025	0.19	0.384	1.45746453599478e-47
ENSG00000070761	CFAP20	7.16235221999578e-52	-0.922334	0.213	0.409	1.54162469183189e-47
ENSG00000083799	CYLD	1.17644329452687e-51	-0.7963	0.406	0.58	2.53217654713963e-47
ENSG00000198843	SELENOT	2.42587692638102e-51	-0.746513	0.527	0.637	5.22145749634251e-47
NA	FAM129B	2.6404047334113e-51	1.09504818841826	0.183	0.051	5.68320714819448e-47
ENSG00000102804	TSC22D1	3.01293703426048e-51	-1.33883	0.137	0.319	6.48504567254226e-47
ENSG00000166900	STX3	3.69666604829987e-51	-0.787836	0.268	0.468	7.95670400236063e-47
ENSG00000065135	GNAI3	3.96250369865234e-51	-0.897006	0.284	0.46	8.52889296097929e-47
ENSG00000143162	CREG1	4.8360610890744e-51	-0.823498	0.356	0.535	1.04091378881237e-46
ENSG00000173145	NOC3L	5.01573438349827e-51	-1.93393	0.039	0.187	1.07958666870417e-46
ENSG00000126698	DNAJC8	5.66188033973559e-51	-0.617675	0.43	0.597	1.21866312432469e-46
ENSG00000171988	JMJD1C	5.7916340334199e-51	-0.842814	0.39	0.565	1.2465913093533e-46
ENSG00000164190	NIPBL	6.00735494379268e-51	-0.901332	0.239	0.438	1.29302307810194e-46
ENSG00000164548	TRA2A	8.30226962963484e-51	-0.728704	0.524	0.651	1.7869805150826e-46
ENSG00000165782	PIP4P1	8.71277042651239e-51	-1.03929	0.114	0.296	1.87533670660253e-46
ENSG00000109046	WSB1	9.05089811255143e-51	-0.7052	0.356	0.538	1.94811530974557e-46
ENSG00000142235	LMTK3	9.51000529284457e-51	1.37969534234373	0.165	0.042	2.04693353923187e-46
ENSG00000086666	ZFAND6	9.63806867976279e-51	-0.745492	0.443	0.581	2.07449790263214e-46
ENSG00000221983	UBA52	9.69291805078978e-51	0.336794843407037	0.848	0.797	2.08630368125199e-46
ENSG00000142227	EMP3	1.16412295184959e-50	0.897883556523556	0.242	0.087	2.50565824156105e-46
ENSG00000125356	NDUFA1	1.26211478769853e-50	0.713326847807108	0.429	0.24	2.71657586904233e-46
ENSG00000108671	PSMD11	1.32951168198281e-50	-0.799159	0.236	0.432	2.8616409442998e-46
ENSG00000156804	FBXO32	1.72909582696598e-50	-1.0888	0.172	0.363	3.72170585796159e-46
ENSG00000102007	PLP2	2.43639856392516e-50	1.02348842287852	0.184	0.051	5.2441042689925e-46
ENSG00000168389	MFSD2A	2.92980075749383e-50	-2.12952	0.039	0.184	6.30610315042972e-46
ENSG00000082269	FAM135A	3.29640390892328e-50	-1.12308	0.116	0.296	7.09517977356646e-46
ENSG00000171867	PRNP	4.09353547490431e-50	-1.02721	0.262	0.45	8.81092575618403e-46
ENSG00000122862	SRGN	4.17262655974529e-50	0.79876446966012	0.291	0.123	8.98116140719577e-46
ENSG00000112701	SENP6	8.93700794161075e-50	-1.04432	0.11	0.294	1.9236015893523e-45
ENSG00000069667	RORA	1.02125131194361e-49	-0.91385	0.249	0.435	2.19814132382742e-45
ENSG00000150991	UBC	1.1601392285339e-49	-0.30481	0.946	0.974	2.49708367549637e-45
ENSG00000133104	SPART	1.18570198491872e-49	-1.35438	0.055	0.211	2.55210495233906e-45
ENSG00000101888	NXT2	2.8759188178477e-49	-1.80288	0.046	0.194	6.19012766353539e-45
ENSG00000075568	TMEM131	2.94078834507029e-49	-1.12868	0.107	0.286	6.3297528339293e-45
ENSG00000130755	GMFG	3.93235223358859e-49	1.20715281662368	0.154	0.037	8.46399494757609e-45
ENSG00000023287	RB1CC1	4.09377164303303e-49	-0.704616	0.394	0.566	8.81143408446429e-45
ENSG00000182853	VMO1	4.58793272131757e-49	0.767055979266311	0.217	0.073	9.87506638936393e-45
ENSG00000133773	CCDC59	4.7679980107861e-49	-0.803654	0.171	0.36	1.0262638918416e-44
ENSG00000113575	PPP2CA	4.78882975366195e-49	-0.62538	0.547	0.654	1.0307477161782e-44
ENSG00000115091	ACTR3	7.41553748831096e-49	-0.779179	0.298	0.474	1.59612028898405e-44
ENSG00000115844	DLX2	7.76315074102516e-49	-1.24194	0.105	0.276	1.67094056549826e-44
ENSG00000135241	PNPLA8	1.07546701258218e-48	-1.05037	0.142	0.318	2.31483519788189e-44
ENSG00000105404	RABAC1	1.15667382744402e-48	0.871680056578115	0.332	0.161	2.4896247461905e-44
ENSG00000005483	KMT2E	1.22517381996049e-48	-0.810446	0.263	0.462	2.63706413008295e-44
ENSG00000140259	MFAP1	1.92953405719015e-48	-1.08964	0.146	0.325	4.15312910469608e-44
ENSG00000178057	NDUFAF3	2.64437709821535e-48	0.905910933169784	0.158	0.04	5.69175726619872e-44
ENSG00000113645	WWC1	2.7905795720419e-48	-1.11304	0.153	0.336	6.00644347086299e-44
ENSG00000178053	MLF1	3.05000616407881e-48	-1.80264	0.025	0.157	6.56483326756323e-44
ENSG00000198692	EIF1AY	4.28735506508893e-48	-1.22391	0.049	0.201	9.22810304209742e-44
ENSG00000106211	HSPB1	4.85829566683883e-48	-0.464661	0.753	0.839	1.04569955933039e-43
ENSG00000158023	WDR66	5.18787523068805e-48	1.26889164108209	0.175	0.05	1.1166382646533e-43
ENSG00000163191	S100A11	5.31857795583564e-48	0.378759612514178	0.888	0.824	1.14477071921406e-43
ENSG00000008988	RPS20	5.3446209878459e-48	0.294166601015089	0.832	0.725	1.15037622142395e-43
ENSG00000197563	PIGN	5.54019246828626e-48	-1.18194	0.123	0.296	1.19247102687393e-43
ENSG00000105372	RPS19	6.1646147947845e-48	0.119290639848087	0.97	0.93	1.32687168842941e-43
ENSG00000175550	DRAP1	6.34146617989075e-48	-0.740931	0.486	0.622	1.36493718055969e-43
ENSG00000167306	MYO5B	6.41505853887059e-48	-1.10992	0.147	0.326	1.38077719990651e-43
ENSG00000173272	MZT2A	7.05606418781001e-48	1.04627242323143	0.174	0.048	1.51874725578423e-43
ENSG00000099204	ABLIM1	7.64533310496602e-48	-0.934126	0.174	0.36	1.64558149751289e-43
ENSG00000268416	AC010329.1	9.23525853150013e-48	-1.54778	0.042	0.184	1.98779704632009e-43
ENSG00000153147	SMARCA5	9.56117915686449e-48	-1.10083	0.093	0.265	2.05794820172351e-43
ENSG00000121390	PSPC1	1.03027200155466e-47	-0.726829	0.203	0.394	2.21755745614624e-43
ENSG00000161547	SRSF2	1.07310898356843e-47	-0.556062	0.668	0.74	2.30975977623268e-43
ENSG00000099992	TBC1D10A	1.15683623135656e-47	-1.1169	0.072	0.232	2.48997430437187e-43
ENSG00000101544	ADNP2	1.69882384445087e-47	-0.840862	0.321	0.505	3.65654844279605e-43
ENSG00000167468	GPX4	2.19367704009535e-47	0.477231906299674	0.568	0.374	4.72167046110124e-43
ENSG00000169689	CENPX	2.37532675496747e-47	0.896573669511475	0.188	0.058	5.11265330739197e-43
ENSG00000125534	PPDPF	2.41070072972331e-47	0.5201777124043	0.689	0.578	5.18879225065645e-43
ENSG00000120705	ETF1	2.95375364836888e-47	-0.664839	0.474	0.596	6.35765935274919e-43
ENSG00000069345	DNAJA2	3.0190578237561e-47	-0.834499	0.244	0.423	6.49822005985264e-43
ENSG00000099246	RAB18	3.27420494858577e-47	-0.874899	0.279	0.453	7.04739873133601e-43
ENSG00000275052	PPP4R3B	3.51634630665447e-47	-0.84179	0.218	0.406	7.56858379044308e-43
ENSG00000162601	MYSM1	4.09057876419135e-47	-0.928108	0.125	0.301	8.80456173204547e-43
ENSG00000108590	MED31	4.47731095021361e-47	-0.772516	0.219	0.408	9.63696408923976e-43
ENSG00000094975	SUCO	4.65590592888998e-47	-1.15749	0.114	0.287	1.00213719213428e-42
ENSG00000100811	YY1	5.21117843359176e-47	-0.757249	0.254	0.449	1.12165404604629e-42
ENSG00000119655	NPC2	5.54706153910867e-47	0.709050796243701	0.404	0.224	1.19394952567775e-42
ENSG00000204386	NEU1	5.69348022958459e-47	-0.921532	0.182	0.365	1.22546468461579e-42
ENSG00000156642	NPTN	6.81201808272552e-47	-0.823812	0.297	0.485	1.46621877212584e-42
ENSG00000162783	IER5	7.43447192008455e-47	-0.656988	0.475	0.629	1.600195736079e-42
ENSG00000204574	ABCF1	8.96307316832093e-47	-0.829511	0.208	0.398	1.9292118687494e-42
ENSG00000154639	CXADR	9.82593280141506e-47	-1.36965	0.082	0.243	2.11493377617658e-42
ENSG00000167768	KRT1	1.05801441589307e-46	1.10271606413363	0.195	0.062	2.27727022876824e-42
ENSG00000128272	ATF4	1.14949406267566e-46	-0.407712	0.793	0.856	2.47417102050309e-42
NA	C19orf70	1.17156314952992e-46	0.712006952704091	0.191	0.06	2.5216725230482e-42
ENSG00000106299	WASL	1.17985371600203e-46	-0.771289	0.422	0.573	2.53951713832278e-42
ENSG00000110321	EIF4G2	1.43475722791322e-46	-0.580962	0.535	0.638	3.08817145736042e-42
ENSG00000204590	GNL1	2.06385285871563e-46	-0.922109	0.125	0.303	4.44223689309952e-42
ENSG00000134697	GNL2	2.64602519423232e-46	-1.1842	0.076	0.231	5.69530462806565e-42
ENSG00000089157	RPLP0	2.65072949062145e-46	0.247429524831932	0.781	0.656	5.70543015561361e-42
ENSG00000133858	ZFC3H1	3.42557927298114e-46	-1.05782	0.107	0.277	7.37321682716461e-42
ENSG00000139496	NUP58	3.85605785866909e-46	-0.935409	0.191	0.378	8.29977893499936e-42
ENSG00000130396	AFDN	4.22510795754385e-46	-0.705729	0.446	0.595	9.09412236781739e-42
ENSG00000141543	EIF4A3	5.01329116240114e-46	-0.751402	0.406	0.56	1.07906078979522e-41
ENSG00000061676	NCKAP1	6.92087818710671e-46	-0.776305	0.219	0.413	1.48964982099285e-41
ENSG00000089220	PEBP1	7.60903046997539e-46	0.834029208308967	0.204	0.068	1.6377677183575e-41
ENSG00000077150	NFKB2	8.24842456998938e-46	-1.22666	0.11	0.278	1.77539090444451e-41
ENSG00000153391	INO80C	8.92664353145655e-46	-1.15575	0.093	0.255	1.92137075371071e-41
ENSG00000155158	TTC39B	9.04142298509584e-46	-1.44822	0.109	0.268	1.94607588331203e-41
ENSG00000221914	PPP2R2A	9.74052652889248e-46	-0.744392	0.406	0.55	2.09655093007882e-41
ENSG00000196776	CD47	1.3154532175396e-45	0.813273096640169	0.175	0.051	2.83138150543224e-41
ENSG00000007168	PAFAH1B1	1.62300926031566e-45	-0.73133	0.298	0.481	3.49336513190342e-41
ENSG00000138593	SECISBP2L	1.97864118097471e-45	-0.950803	0.1	0.268	4.25882727792997e-41
ENSG00000256045	MTRNR2L10	2.13069271094687e-45	1.1049536320861	0.845	0.773	4.58610299104204e-41
ENSG00000245532	NEAT1	2.14952145264665e-45	-0.668804	0.895	0.928	4.62662997467666e-41
ENSG00000172757	CFL1	2.22941259236012e-45	0.524180153862537	0.655	0.504	4.79858766379592e-41
ENSG00000117114	ADGRL2	3.33769257787017e-45	-0.907565	0.24	0.419	7.18404950460776e-41
ENSG00000132341	RAN	4.35849648700628e-45	-0.5933	0.495	0.627	9.38122783863233e-41
ENSG00000198092	TMPRSS11F	4.9307511550588e-45	-1.04582	0.16	0.333	1.06129487861486e-40
ENSG00000092203	TOX4	4.99670838666072e-45	-0.768662	0.354	0.518	1.07549151314485e-40
ENSG00000132485	ZRANB2	5.53396773130101e-45	-0.836192	0.204	0.389	1.19113121448523e-40
ENSG00000103342	GSPT1	7.71008809144799e-45	-0.822142	0.161	0.342	1.65951936080327e-40
ENSG00000144566	RAB5A	7.76786010648341e-45	-0.681612	0.465	0.606	1.67195420931949e-40
ENSG00000136044	APPL2	7.85610191456699e-45	-1.01805	0.121	0.291	1.6909473760914e-40
ENSG00000130748	TMEM160	8.72174301178787e-45	1.1807281789371	0.16	0.044	1.87726796585722e-40
ENSG00000025772	TOMM34	9.2771745491862e-45	-0.936234	0.159	0.334	1.99681904996684e-40
ENSG00000198898	CAPZA2	9.46679987580828e-45	-0.953077	0.248	0.416	2.03763400526897e-40
ENSG00000138942	RNF185	9.89132430891932e-45	-0.994173	0.244	0.411	2.12900864425179e-40
ENSG00000116251	RPL22	1.21125837015037e-44	0.233667366146854	0.747	0.598	2.60711251591167e-40
ENSG00000178075	GRAMD1C	1.24515533775597e-44	-1.02243	0.151	0.324	2.68007234898595e-40
ENSG00000204592	HLA-E	1.28441489970517e-44	0.62885572544281	0.704	0.59	2.76457463012541e-40
ENSG00000164096	C4orf3	1.48820585998004e-44	0.549107318618264	0.705	0.583	3.20321429302105e-40
ENSG00000171109	MFN1	1.61369507178743e-44	-1.24785	0.08	0.232	3.47331727251526e-40
ENSG00000124145	SDC4	1.67234061348379e-44	-1.07713	0.333	0.498	3.5995459364625e-40
ENSG00000196937	FAM3C	1.86618053958796e-44	-1.26397	0.072	0.223	4.01676699340912e-40
ENSG00000163374	YY1AP1	2.36746446446882e-44	-0.664156	0.346	0.523	5.09573051332268e-40
ENSG00000175197	DDIT3	2.40895641144168e-44	-0.720622	0.309	0.483	5.18503777998707e-40
ENSG00000086758	HUWE1	2.80477130836618e-44	-0.753078	0.194	0.381	6.03698976412736e-40
ENSG00000109519	GRPEL1	3.00929604526442e-44	-0.987626	0.159	0.332	6.47720880782714e-40
ENSG00000169991	IFFO2	3.88731770065226e-44	-1.74563	0.042	0.178	8.36706261888393e-40
ENSG00000182400	TRAPPC6B	3.93950113251299e-44	-1.03835	0.099	0.261	8.47938223762096e-40
ENSG00000139112	GABARAPL1	3.96509108377258e-44	-0.741583	0.283	0.465	8.53446204871211e-40
ENSG00000113384	GOLPH3	4.63510830710618e-44	-0.734788	0.204	0.387	9.97660712021535e-40
ENSG00000131979	GCH1	5.97349504412432e-44	-1.29379	0.09	0.244	1.28573507329732e-39
ENSG00000103335	PIEZO1	6.16677585693869e-44	-0.888838	0.297	0.484	1.32733683544748e-39
ENSG00000092439	TRPM7	6.6797822887036e-44	-1.34707	0.07	0.222	1.43775633982056e-39
ENSG00000121966	CXCR4	7.06150342335006e-44	0.820664038039646	0.206	0.072	1.51991799684187e-39
ENSG00000155111	CDK19	7.25954278164202e-44	-1.19797	0.093	0.253	1.56254398832063e-39
ENSG00000144635	DYNC1LI1	7.53397405681951e-44	-0.850216	0.145	0.316	1.62161257598983e-39
ENSG00000124172	ATP5F1E	7.71629573104695e-44	0.441426940948107	0.779	0.68	1.66085549315054e-39
ENSG00000162413	KLHL21	9.69500215685963e-44	-0.865037	0.273	0.456	2.08675226424247e-39
ENSG00000204344	STK19	1.1210542875896e-43	-1.17427	0.098	0.256	2.41295724860786e-39
ENSG00000197372	ZNF675	1.94294850396493e-43	-1.48289	0.027	0.151	4.18200235993412e-39
ENSG00000182196	ARL6IP4	1.99679509979123e-43	0.609518270344962	0.334	0.166	4.29790177279064e-39
ENSG00000104529	EEF1D	2.00966513551365e-43	0.429693807249036	0.715	0.612	4.32560323767957e-39
ENSG00000117505	DR1	2.24231667720244e-43	-0.805364	0.177	0.357	4.82636241601052e-39
ENSG00000114861	FOXP1	2.26571563724742e-43	0.828922801930463	0.291	0.136	4.87672633761135e-39
ENSG00000165916	PSMC3	2.59607193277421e-43	-0.853473	0.257	0.43	5.58778522810322e-39
ENSG00000112149	CD83	3.12153771921909e-43	-1.25452	0.191	0.365	6.71879778684716e-39
ENSG00000133030	MPRIP	3.81189061962029e-43	1.06011	0.303	0.151	8.20471336967072e-39
ENSG00000025708	TYMP	4.73636738143496e-43	0.736722361833828	0.382	0.214	1.01945571518006e-38
ENSG00000169905	TOR1AIP2	6.51210718775042e-43	-0.70207	0.445	0.588	1.4016659510914e-38
ENSG00000166233	ARIH1	6.72765432230953e-43	-0.7002	0.236	0.423	1.4480603163339e-38
ENSG00000080371	RAB21	7.55682228835012e-43	-0.719026	0.331	0.506	1.62653042934448e-38
ENSG00000134352	IL6ST	8.50721767079239e-43	-0.943489	0.217	0.389	1.83109353146135e-38
ENSG00000130429	ARPC1B	1.32289002232738e-42	1.12986168129907	0.179	0.058	2.84738848405745e-38
NA	C2orf54	1.43274077722229e-42	-0.977731	0.21	0.38	3.08383124889326e-38
ENSG00000170906	NDUFA3	1.45497847965092e-42	1.12706907988073	0.256	0.112	3.13169567960064e-38
ENSG00000185963	BICD2	1.80646328293031e-42	-1.7775	0.054	0.191	3.8882315701792e-38
ENSG00000141741	MIEN1	1.99675068323824e-42	-0.555591	0.512	0.63	4.29780617060199e-38
ENSG00000126653	NSRP1	2.008242721059e-42	-0.840846	0.155	0.327	4.32254163280739e-38
ENSG00000087510	TFAP2C	2.01948061860998e-42	-1.17346	0.061	0.204	4.34673008349613e-38
ENSG00000120963	ZNF706	2.14250139293795e-42	-0.833442	0.285	0.471	4.61151999815965e-38
ENSG00000156508	EEF1A1	2.4811660887041e-42	0.473013697031346	0.918	0.859	5.34046188932671e-38
ENSG00000116288	PARK7	2.51040973282075e-42	0.721346225578967	0.278	0.125	5.40340590892338e-38
ENSG00000026025	VIM	3.55982781049155e-42	0.309056950786421	0.364	0.181	7.66217337930202e-38
ENSG00000134107	BHLHE40	3.73693019444959e-42	-1.01885	0.254	0.425	8.04336855053329e-38
ENSG00000115816	CEBPZ	3.78631778471821e-42	-0.929505	0.08	0.232	8.14967039982748e-38
ENSG00000197170	PSMD12	4.28141924843781e-42	-0.838098	0.154	0.32	9.21532679033755e-38
ENSG00000173451	THAP2	4.41159246652404e-42	-1.1092	0.064	0.208	9.49551162494634e-38
ENSG00000105856	HBP1	6.01930319176988e-42	-0.613073	0.466	0.593	1.29559481899655e-37
ENSG00000072364	AFF4	6.65707077353334e-42	-0.722829	0.272	0.453	1.43286791329532e-37
ENSG00000142867	BCL10	7.23621349648143e-42	-1.00641	0.114	0.274	1.55752259298266e-37
ENSG00000139722	VPS37B	7.32145834996781e-42	-0.807896	0.349	0.51	1.57587069524707e-37
ENSG00000138385	SSB	7.52277825896003e-42	-0.935577	0.093	0.25	1.61920279245856e-37
ENSG00000163932	PRKCD	9.60444262259484e-42	-1.56191	0.041	0.169	2.06726023008731e-37
ENSG00000170540	ARL6IP1	1.1104023447245e-41	-0.575749	0.551	0.666	2.39003000678501e-37
ENSG00000126261	UBA2	1.17175284822416e-41	-0.825978	0.26	0.424	2.52208083051768e-37
ENSG00000123358	NR4A1	1.22060606151619e-41	-1.4511	0.076	0.223	2.62723248680745e-37
ENSG00000157107	FCHO2	1.36178155457097e-41	-0.724262	0.335	0.497	2.93109861805856e-37
ENSG00000180773	SLC36A4	1.56624504884415e-41	-1.08218	0.079	0.23	3.37118584313216e-37
ENSG00000163602	RYBP	1.62663835406503e-41	-0.733753	0.366	0.532	3.50117639328956e-37
ENSG00000168899	VAMP5	1.67665214550921e-41	0.7737409855338	0.168	0.052	3.60882607799402e-37
ENSG00000169035	KLK7	1.78038869945888e-41	-0.759217	0.299	0.466	3.83210863671529e-37
ENSG00000033627	ATP6V0A1	1.89674923639302e-41	-1.17415	0.104	0.258	4.08256305641234e-37
ENSG00000129824	RPS4Y1	1.92785144637954e-41	-1.08607	0.123	0.292	4.14950745318733e-37
ENSG00000255823	MTRNR2L8	1.97514490822183e-41	1.16091270327097	0.949	0.937	4.25130190045667e-37
ENSG00000196470	SIAH1	2.06505676001934e-41	-0.962402	0.132	0.297	4.44482817026563e-37
ENSG00000115084	SLC35F5	2.5097042108836e-41	-1.14709	0.124	0.282	5.40188734350587e-37
ENSG00000128510	CPA4	2.88191184416834e-41	-0.652841	0.612	0.73	6.20302705338794e-37
ENSG00000111647	UHRF1BP1L	2.93651692863198e-41	-1.03932	0.149	0.315	6.32055903718748e-37
ENSG00000085415	SEH1L	2.98351475475922e-41	-1.09725	0.044	0.176	6.42171715814374e-37
ENSG00000155368	DBI	3.70547869519181e-41	0.732712390168403	0.403	0.236	7.97567234353085e-37
ENSG00000090060	PAPOLA	3.71843329525246e-41	-0.566505	0.482	0.61	8.00355582470139e-37
ENSG00000186567	CEACAM19	4.75582645330194e-41	-1.65644	0.07	0.208	1.02364408580871e-36
ENSG00000185201	IFITM2	5.50763580675318e-41	0.400581850340233	0.216	0.078	1.18546353104556e-36
ENSG00000186432	KPNA4	6.11127753297632e-41	-1.0104	0.166	0.33	1.31539137619782e-36
ENSG00000236453	AC003092.1	6.1874710162452e-41	-1.0821	0.06	0.199	1.33179126153662e-36
ENSG00000136560	TANK	6.27576597362934e-41	-0.753523	0.235	0.408	1.35079586816398e-36
ENSG00000163584	RPL22L1	6.35371446848043e-41	-0.667641	0.368	0.519	1.36757350219573e-36
ENSG00000183520	UTP11	6.53406875733635e-41	-0.805104	0.132	0.3	1.40639295932907e-36
ENSG00000127328	RAB3IP	7.56972506986564e-41	-1.157	0.09	0.24	1.62930762403788e-36
ENSG00000177425	PAWR	7.58063930815869e-41	-1.29918	0.04	0.167	1.63165680468808e-36
ENSG00000111011	RSRC2	7.70164520804052e-41	-0.352466	0.737	0.814	1.65770211457864e-36
ENSG00000159399	HK2	7.74993274212411e-41	1.49502956006981	0.19	0.069	1.66809552341479e-36
ENSG00000197063	MAFG	8.10105004875287e-41	-0.705087	0.298	0.476	1.74367001249357e-36
ENSG00000021355	SERPINB1	8.57025934550005e-41	1.06513875512189	0.184	0.065	1.84466262152543e-36
ENSG00000141384	TAF4B	9.49379203740322e-41	-1.23512	0.08	0.227	2.04344379813067e-36
ENSG00000134748	PRPF38A	1.00885613932942e-40	-0.78977	0.227	0.39	2.17146195429264e-36
ENSG00000168528	SERINC2	1.13092576191499e-40	1.13636014355732	0.191	0.069	2.43420460994583e-36
ENSG00000180957	PITPNB	1.14112706101178e-40	-0.828345	0.146	0.31	2.45616188612175e-36
ENSG00000136153	LMO7	1.26004770429862e-40	-0.943957	0.171	0.335	2.71212667873234e-36
ENSG00000134291	TMEM106C	1.30117653125967e-40	-1.0719	0.093	0.244	2.80065236588331e-36
ENSG00000162819	BROX	1.41299535277832e-40	-0.752094	0.205	0.378	3.04133119732006e-36
ENSG00000135541	AHI1	1.43219387551544e-40	-0.714171	0.101	0.261	3.08265409765943e-36
ENSG00000136738	STAM	1.49902219301312e-40	-0.900207	0.171	0.342	3.22649536824144e-36
ENSG00000134419	RPS15A	1.56778134833353e-40	0.221152419506973	0.922	0.862	3.37449257415309e-36
ENSG00000183735	TBK1	1.96422253888284e-40	-1.10544	0.053	0.188	4.22779259269142e-36
ENSG00000163220	S100A9	2.12718156932616e-40	0.305607747535731	0.956	0.934	4.57854560981763e-36
ENSG00000177600	RPLP2	2.13440387483233e-40	0.135365877705737	0.962	0.937	4.5940909001891e-36
ENSG00000080822	CLDND1	2.13783277081159e-40	-0.693186	0.298	0.458	4.60147125589487e-36
ENSG00000107854	TNKS2	2.26409329969669e-40	-0.852143	0.153	0.323	4.87323441826715e-36
ENSG00000118985	ELL2	2.52003969436423e-40	-0.850214	0.344	0.496	5.42413343814957e-36
ENSG00000166946	CCNDBP1	2.69290192479749e-40	1.24736599930749	0.167	0.054	5.79620210293412e-36
ENSG00000102554	KLF5	2.86800851023705e-40	-0.847801	0.338	0.495	6.17310151743422e-36
ENSG00000170545	SMAGP	2.87348680075209e-40	-0.676847	0.269	0.44	6.18489298993879e-36
ENSG00000133961	NUMB	3.22055339214645e-40	-0.813086	0.205	0.371	6.93191912125602e-36
ENSG00000132326	PER2	3.42420179544671e-40	-1.64061	0.032	0.151	7.37025194451949e-36
ENSG00000108298	RPL19	3.48351422363357e-40	0.247886304282094	0.887	0.814	7.49791601494889e-36
ENSG00000237330	RNF223	3.53398483605254e-40	-0.821461	0.322	0.484	7.60654896111948e-36
ENSG00000112081	SRSF3	3.54973826244565e-40	-0.401276	0.811	0.857	7.64045663608801e-36
ENSG00000162613	FUBP1	4.70281644264074e-40	-0.689256	0.278	0.452	1.01223421111399e-35
ENSG00000204020	LIPN	5.9232727937641e-40	-1.31593	0.082	0.222	1.27492523612979e-35
ENSG00000144063	MALL	8.67502336507728e-40	1.18219867446275	0.272	0.131	1.86721202909923e-35
ENSG00000188010	MORN2	9.4502662204207e-40	-1.02689	0.058	0.195	2.03407530128335e-35
ENSG00000114316	USP4	1.09445324584175e-39	-0.998976	0.077	0.221	2.35570116634978e-35
ENSG00000116586	LAMTOR2	1.12106391761836e-39	0.936113885292812	0.166	0.053	2.41297797628175e-35
ENSG00000164134	NAA15	1.16943118427452e-39	-0.918614	0.134	0.295	2.51708368103247e-35
ENSG00000100796	PPP4R3A	1.17847153662445e-39	-0.784113	0.205	0.38	2.53654213543046e-35
ENSG00000184009	ACTG1	1.36982718446195e-39	0.283267085322917	0.917	0.845	2.94841603183591e-35
ENSG00000171202	TMEM126A	1.84767239291388e-39	-0.92683	0.103	0.257	3.97693005850783e-35
ENSG00000138069	RAB1A	2.90412626207035e-39	-0.582624	0.516	0.613	6.25084136648023e-35
ENSG00000121060	TRIM25	2.98441221009506e-39	-1.33403	0.139	0.293	6.4236488410086e-35
ENSG00000175895	PLEKHF2	3.06604894885126e-39	-1.0095	0.085	0.232	6.59936375750745e-35
ENSG00000175130	MARCKSL1	3.58762883175444e-39	0.444835556261789	0.546	0.384	7.72201229746826e-35
ENSG00000104979	C19orf53	5.39043627989671e-39	0.659942464038015	0.389	0.226	1.16023750488497e-34
ENSG00000144445	KANSL1L	5.46886683523049e-39	-1.24263	0.04	0.163	1.17711889761501e-34
ENSG00000123562	MORF4L2	7.05998483889859e-39	-0.591219	0.464	0.598	1.51959113672453e-34
ENSG00000156502	SUPV3L1	7.34316515225319e-39	-0.846233	0.125	0.285	1.58054286737098e-34
ENSG00000164120	HPGD	7.5032075181229e-39	-1.3428	0.158	0.312	1.61499038620077e-34
ENSG00000168003	SLC3A2	7.97872661552588e-39	-0.700157	0.329	0.494	1.71734111672579e-34
ENSG00000241343	RPL36A	8.94553697904182e-39	0.333241079829064	0.613	0.46	1.92543737936896e-34
ENSG00000182541	LIMK2	1.0658096347137e-38	-0.94736	0.073	0.214	2.29404865775778e-34
NA	AC009501.1	1.26381563018752e-38	0.662078345996123	0.381	0.228	2.72023676241561e-34
ENSG00000189241	TSPYL1	1.57397032805805e-38	-0.82443	0.229	0.394	3.38781373411215e-34
ENSG00000176386	CDC26	1.80451788980419e-38	-0.755031	0.201	0.368	3.88404430601454e-34
ENSG00000173846	PLK3	1.81317885153931e-38	-1.0737	0.075	0.215	3.90268616005321e-34
ENSG00000115268	RPS15	1.88602001112543e-38	0.0823536674901506	0.917	0.877	4.05946947194639e-34
ENSG00000129235	TXNDC17	2.13798765589545e-38	0.806113040450627	0.162	0.051	4.60180463054936e-34
ENSG00000160014	CALM3	2.15083924641518e-38	0.836434014400412	0.309	0.161	4.62946639398403e-34
ENSG00000172115	CYCS	2.8842429735414e-38	-0.62081	0.465	0.593	6.20804457625051e-34
ENSG00000114867	EIF4G1	2.94505866407652e-38	-0.673954	0.314	0.482	6.3389442685583e-34
ENSG00000123395	ATG101	3.02481597882601e-38	-0.660028	0.345	0.499	6.51061391282509e-34
ENSG00000152484	USP12	3.10768824791223e-38	-0.917259	0.094	0.241	6.68898818480627e-34
ENSG00000048649	RSF1	3.25058061838688e-38	-0.748408	0.198	0.369	6.99654972301592e-34
ENSG00000123154	WDR83	3.52628873755894e-38	-1.06931	0.067	0.204	7.58998387872187e-34
ENSG00000153187	HNRNPU	4.03787999742717e-38	-0.716911	0.343	0.508	8.69113290646225e-34
ENSG00000023734	STRAP	4.54582668302391e-38	-0.710893	0.232	0.394	9.78443735254066e-34
ENSG00000011638	TMEM159	5.51416054150433e-38	-1.22365	0.083	0.221	1.18686791495339e-33
ENSG00000169045	HNRNPH1	5.63408044509983e-38	-0.755338	0.398	0.547	1.21267947500329e-33
ENSG00000108639	SYNGR2	6.02577596249881e-38	0.679726107300369	0.276	0.133	1.29698801816824e-33
ENSG00000170832	USP32	6.03509100849845e-38	-1.27484	0.041	0.162	1.29899298866921e-33
ENSG00000176624	MEX3C	6.22886226676948e-38	-0.861857	0.132	0.291	1.34070031429946e-33
ENSG00000169567	HINT1	6.61070899771048e-38	0.434040971424471	0.592	0.43	1.4228890046672e-33
ENSG00000157106	SMG1	6.76152423398208e-38	-0.783737	0.201	0.372	1.4553504761223e-33
ENSG00000049246	PER3	7.8046806425323e-38	-0.98484	0.084	0.227	1.67987946149865e-33
ENSG00000172009	THOP1	8.77098960872294e-38	-1.33772	0.048	0.172	1.88786780338153e-33
ENSG00000071539	TRIP13	8.84848854672787e-38	-1.32958	0.062	0.192	1.90454867479771e-33
ENSG00000144597	EAF1	1.13230510780226e-37	-0.943281	0.169	0.329	2.4371735140336e-33
ENSG00000143761	ARF1	1.18738913988981e-37	-0.477333	0.59	0.669	2.55573638469883e-33
ENSG00000065559	MAP2K4	1.32161775910799e-37	-0.873468	0.078	0.219	2.84465006470403e-33
ENSG00000136732	GYPC	1.32410398331633e-37	0.477851852439548	0.151	0.044	2.85000141369006e-33
ENSG00000159720	ATP6V0D1	1.40300335896748e-37	-0.540438	0.485	0.61	3.0198244298416e-33
ENSG00000105254	TBCB	1.46898808294184e-37	1.09330795454979	0.182	0.067	3.16184994972403e-33
ENSG00000147697	GSDMC	1.49530007344959e-37	-0.926783	0.107	0.254	3.2184838780929e-33
ENSG00000120053	GOT1	1.61831447955835e-37	-0.920881	0.11	0.259	3.48326008580139e-33
ENSG00000171970	ZNF57	1.63981706978212e-37	-1.14463	0.094	0.237	3.52954226099904e-33
ENSG00000100603	SNW1	1.72468470747724e-37	-0.655103	0.167	0.329	3.71221136437402e-33
ENSG00000179271	GADD45GIP1	1.74771985127611e-37	0.488161498948503	0.269	0.124	3.76179220788671e-33
ENSG00000105880	DLX5	2.16325981471161e-37	-1.52563	0.036	0.152	4.65620042518527e-33
ENSG00000164171	ITGA2	3.04762745455172e-37	0.998574184066144	0.214	0.087	6.55971333317713e-33
ENSG00000152944	MED21	3.14123473279766e-37	-0.727603	0.291	0.449	6.76119363887367e-33
ENSG00000137449	CPEB2	3.26241211175435e-37	-1.16647	0.159	0.313	7.02201582934006e-33
ENSG00000176340	COX8A	3.61191476210353e-37	0.612019552753758	0.45	0.299	7.77428533395164e-33
ENSG00000122034	GTF3A	3.6831137779179e-37	1.13767203468052	0.173	0.061	7.92753409559048e-33
ENSG00000133872	SARAF	4.10916271942582e-37	1.01797515960734	0.323	0.176	8.84456183729214e-33
ENSG00000172380	GNG12	4.90550001979446e-37	-0.998828	0.143	0.295	1.05585982426056e-32
ENSG00000130821	SLC6A8	5.1821026316787e-37	1.16613803967763	0.2	0.079	1.11539577044252e-32
ENSG00000108651	UTP6	5.22940463853649e-37	-1.0686	0.076	0.214	1.12557705439859e-32
ENSG00000172466	ZNF24	5.232421225055e-37	-1.22786	0.09	0.23	1.12622634448084e-32
ENSG00000182831	C16orf72	5.44020571294306e-37	-0.590536	0.34	0.51	1.17094987765387e-32
ENSG00000176171	BNIP3	6.17980906926585e-37	0.708221476673167	0.52	0.374	1.33014210406878e-32
ENSG00000125351	UPF3B	7.81058252309022e-37	-0.833035	0.097	0.243	1.68114978226994e-32
ENSG00000064995	TAF11	8.07497159600486e-37	-0.76134	0.084	0.225	1.73805688632409e-32
ENSG00000198586	TLK1	8.34400033246409e-37	-0.69484	0.093	0.241	1.79596263155957e-32
ENSG00000076053	RBM7	8.51404987502851e-37	-0.763852	0.213	0.369	1.83256409510114e-32
ENSG00000182919	C11orf54	9.96998590566077e-37	-1.31343	0.049	0.171	2.14593976633442e-32
ENSG00000157837	SPPL3	1.13067191135768e-36	-0.764031	0.189	0.36	2.43365822200628e-32
ENSG00000125347	IRF1	1.279264794201e-36	-1.25887	0.157	0.308	2.75348954303824e-32
ENSG00000104756	KCTD9	1.32992821135522e-36	-0.922426	0.126	0.276	2.86253748212097e-32
ENSG00000138670	RASGEF1B	1.47796797264893e-36	-0.808544	0.371	0.519	3.18117826432956e-32
ENSG00000257103	LSM14A	1.69117094539043e-36	-0.715504	0.273	0.428	3.64007634285836e-32
ENSG00000177189	RPS6KA3	1.76850115091369e-36	-0.727897	0.183	0.349	3.80652187722662e-32
ENSG00000115540	MOB4	1.95870220522007e-36	-0.90127	0.112	0.261	4.21591062651567e-32
ENSG00000138663	COPS4	2.10349011308903e-36	-0.87878	0.098	0.239	4.52755211941283e-32
ENSG00000143507	DUSP10	2.21457204194332e-36	-1.3347	0.053	0.177	4.76664486307881e-32
ENSG00000165280	VCP	2.26937781959397e-36	-0.615312	0.401	0.538	4.88460881889406e-32
ENSG00000130592	LSP1	2.27336967985817e-36	0.590236708041217	0.267	0.124	4.89320089892674e-32
ENSG00000069956	MAPK6	2.54412154300421e-36	-0.656943	0.266	0.43	5.47596720916226e-32
ENSG00000055044	NOP58	2.64474722374421e-36	-0.750096	0.212	0.375	5.69255392438703e-32
ENSG00000258791	LINC00520	2.77438702036178e-36	1.13766993486718	0.196	0.076	5.9715906226267e-32
ENSG00000168288	MMADHC	3.19175414508992e-36	-0.617185	0.376	0.511	6.86993162189155e-32
ENSG00000112715	VEGFA	3.19430758315578e-36	0.991771843147248	0.226	0.099	6.8754276419845e-32
ENSG00000187446	CHP1	3.31623457395804e-36	-0.757244	0.291	0.448	7.13786329698728e-32
ENSG00000125871	MGME1	3.42765392955577e-36	-0.992243	0.07	0.203	7.37768231797583e-32
ENSG00000147416	ATP6V1B2	3.84296916099439e-36	-0.536779	0.48	0.612	8.27160682212433e-32
ENSG00000062725	APPBP2	3.84582962493763e-36	-0.829139	0.128	0.28	8.27776368471575e-32
ENSG00000161960	EIF4A1	4.24390197869982e-36	-0.753679	0.294	0.452	9.13457461895349e-32
ENSG00000162980	ARL5A	4.41526960338132e-36	-1.29401	0.045	0.163	9.50342629431795e-32
ENSG00000133997	MED6	4.82704525233656e-36	-0.721269	0.26	0.413	1.03897322011292e-31
ENSG00000136682	CBWD2	4.96986742680422e-36	-1.06932	0.065	0.197	1.06971426494534e-31
ENSG00000161249	DMKN	5.03194525299947e-36	-0.418986	0.808	0.903	1.08307589625561e-31
ENSG00000135655	USP15	5.09665287896028e-36	-0.628242	0.167	0.329	1.09700356566741e-31
ENSG00000203711	C6orf99	5.85839215471866e-36	-1.23756	0.044	0.162	1.26096032738164e-31
ENSG00000071243	ING3	5.91800954510012e-36	-0.852214	0.075	0.209	1.27379237448735e-31
ENSG00000123349	PFDN5	7.47582524669158e-36	0.329630047330213	0.712	0.589	1.6090966260979e-31
ENSG00000172361	CFAP53	7.74711571470764e-36	-1.17381	0.041	0.157	1.66748918643367e-31
ENSG00000179119	SPTY2D1	8.03507242717136e-36	-0.657624	0.246	0.414	1.72946898922436e-31
ENSG00000033030	ZCCHC8	8.79704808735832e-36	-0.694529	0.219	0.38	1.893476630323e-31
ENSG00000163319	MRPS18C	8.93396863723969e-36	-0.720667	0.216	0.38	1.92294740947947e-31
ENSG00000104856	RELB	9.17690736971406e-36	-0.856732	0.146	0.299	1.97523754225725e-31
ENSG00000119396	RAB14	9.71820166106281e-36	-0.742554	0.22	0.378	2.09174572552716e-31
ENSG00000126945	HNRNPH2	1.09741685509388e-35	-0.658886	0.312	0.464	2.36208003890408e-31
ENSG00000225733	FGD5-AS1	1.33503140067942e-35	-0.78691	0.166	0.324	2.87352158682239e-31
ENSG00000154518	ATP5MC3	1.41785810306039e-35	0.795666556257443	0.308	0.166	3.05179778102718e-31
ENSG00000188215	DCUN1D3	1.64028173608829e-35	-1.2542	0.056	0.177	3.53054240875643e-31
ENSG00000134717	BTF3L4	1.68226419204876e-35	-0.625807	0.166	0.324	3.62090544696575e-31
ENSG00000163577	EIF5A2	1.71489832657792e-35	-1.06542	0.115	0.254	3.69114715812632e-31
ENSG00000095787	WAC	1.72525718072292e-35	-0.641054	0.352	0.498	3.71344355578801e-31
ENSG00000134531	EMP1	1.86364753466166e-35	0.755052916263126	0.515	0.357	4.01131495360577e-31
ENSG00000135114	OASL	1.87437378364672e-35	-1.68652	0.092	0.223	4.03440213192119e-31
ENSG00000196735	HLA-DQA1	1.9753812399631e-35	0.951966010137512	0.169	0.06	4.25181058089659e-31
ENSG00000147669	POLR2K	2.55784848157617e-35	-0.467402	0.362	0.52	5.50551307174456e-31
ENSG00000125835	SNRPB	2.82819089190713e-35	-0.537617	0.516	0.623	6.0873980757409e-31
ENSG00000104671	DCTN6	2.83704765452848e-35	-0.792856	0.208	0.364	6.1064613716071e-31
ENSG00000054267	ARID4B	3.20722261515513e-35	-0.55325	0.212	0.382	6.90322595685991e-31
ENSG00000148925	BTBD10	3.69191204754145e-35	-0.921394	0.121	0.264	7.94647149112822e-31
ENSG00000159579	RSPRY1	3.80136193548058e-35	-1.15021	0.058	0.184	8.18205142992839e-31
ENSG00000136888	ATP6V1G1	3.87611404514495e-35	-0.442909	0.625	0.698	8.34294787076998e-31
ENSG00000124882	EREG	3.95764133552506e-35	-2.01013	0.053	0.171	8.51842721058414e-31
ENSG00000165322	ARHGAP12	4.18240617658566e-35	-0.926899	0.082	0.218	9.00221105448298e-31
ENSG00000175470	PPP2R2D	4.37122976953364e-35	-0.890553	0.203	0.361	9.40863495594422e-31
ENSG00000116539	ASH1L	5.3713949082235e-35	-0.716395	0.19	0.359	1.15613904004603e-30
ENSG00000160679	CHTOP	5.44977604410005e-35	-0.573861	0.311	0.468	1.17300979573209e-30
ENSG00000107581	EIF3A	5.97713235041818e-35	-0.55244	0.432	0.571	1.28651796710401e-30
ENSG00000149932	TMEM219	6.13155037022225e-35	0.862249181993271	0.184	0.071	1.31975490168664e-30
ENSG00000013441	CLK1	6.18468935834297e-35	-0.448338	0.64	0.719	1.33119253748974e-30
ENSG00000136754	ABI1	6.41096638213395e-35	-0.64931	0.241	0.401	1.37989640409051e-30
ENSG00000137055	PLAA	7.43030759167249e-35	-1.06977	0.06	0.184	1.59929940603159e-30
NA	ASNA1	8.10189813945351e-35	-0.615682	0.292	0.449	1.74385255553597e-30
ENSG00000183696	UPP1	9.80066869616153e-35	-0.850745	0.593	0.665	2.10949593016181e-30
ENSG00000170836	PPM1D	1.0468729748667e-34	-0.691141	0.23	0.386	2.25328939110308e-30
ENSG00000188419	CHM	1.24769887027626e-34	-1.12763	0.059	0.183	2.68554704838262e-30
ENSG00000159592	GPBP1L1	1.30136932871129e-34	-0.655542	0.221	0.383	2.80106734311818e-30
ENSG00000117000	RLF	1.30987634018491e-34	-0.666808	0.338	0.488	2.81937783461399e-30
ENSG00000147123	NDUFB11	1.44142325110381e-34	0.716207620509498	0.537	0.402	3.10251940567585e-30
ENSG00000211445	GPX3	1.53121831933796e-34	0.798871270416187	0.431	0.294	3.29579431054302e-30
ENSG00000112245	PTP4A1	1.57874508360859e-34	-0.689212	0.376	0.514	3.39809091795912e-30
ENSG00000167397	VKORC1	1.65097974301453e-34	0.990276873920612	0.184	0.072	3.55356879886447e-30
ENSG00000108669	CYTH1	1.7629404996969e-34	-0.789711	0.225	0.383	3.79455313154761e-30
ENSG00000198393	ZNF26	1.91966180151767e-34	-0.782668	0.038	0.15	4.13188006158664e-30
ENSG00000067225	PKM	2.06717132797465e-34	0.614465271813621	0.383	0.229	4.44937956633264e-30
ENSG00000172428	COPS9	2.27707276053822e-34	0.627770207496426	0.451	0.308	4.90117140978247e-30
ENSG00000182489	XKRX	2.34339905379649e-34	-0.934473	0.143	0.288	5.04393212339156e-30
ENSG00000269821	KCNQ1OT1	2.49006089953621e-34	-1.20721	0.109	0.247	5.35960708016174e-30
ENSG00000181458	TMEM45A	2.61376152901696e-34	-0.905095	0.195	0.347	5.6258603150561e-30
ENSG00000132466	ANKRD17	3.11841166826753e-34	-0.716562	0.149	0.306	6.71206927477904e-30
ENSG00000148110	MFSD14B	3.13045836990391e-34	-0.89704	0.1	0.239	6.73799859538117e-30
ENSG00000198805	PNP	3.23314435454721e-34	-0.957123	0.258	0.403	6.95901990872742e-30
ENSG00000122958	VPS26A	3.30362960477498e-34	-0.62073	0.385	0.513	7.11073236131767e-30
ENSG00000122406	RPL5	3.40398022309651e-34	0.152854057488698	0.664	0.506	7.32672703219292e-30
ENSG00000072201	LNX1	3.4582167292724e-34	-1.07822	0.159	0.305	7.44346568808592e-30
ENSG00000132329	RAMP1	3.47247376175771e-34	0.617538814353756	0.26	0.125	7.4741525248073e-30
ENSG00000198854	C1orf68	3.48901139219714e-34	-1.57057	0.154	0.291	7.50974812056512e-30
ENSG00000088727	KIF9	3.53018425602466e-34	-0.799039	0.12	0.266	7.59836859266748e-30
ENSG00000175984	DENND2C	3.57079300233044e-34	-0.655433	0.338	0.49	7.68577485821605e-30
ENSG00000174574	AKIRIN1	3.73287196397444e-34	-0.693619	0.264	0.414	8.03463361525859e-30
ENSG00000131469	RPL27	4.01862692203771e-34	0.302148992861741	0.794	0.724	8.64969258699396e-30
ENSG00000164758	MED30	4.25254759007577e-34	-0.911022	0.121	0.263	9.15318343287908e-30
ENSG00000103266	STUB1	4.67453560517161e-34	0.975103370779124	0.184	0.073	1.00614704365714e-29
ENSG00000156873	PHKG2	5.29495828789474e-34	-0.96279	0.148	0.296	1.13968682188646e-29
ENSG00000156603	MED19	5.50431276088282e-34	-0.802475	0.128	0.274	1.18474827865242e-29
ENSG00000123144	TRIR	5.53806312070368e-34	-0.431539	0.591	0.68	1.19201270610026e-29
ENSG00000132388	UBE2G1	6.06751322105888e-34	-0.615777	0.274	0.43	1.30597154570071e-29
ENSG00000131931	THAP1	6.12594136964666e-34	-1.06043	0.085	0.216	1.31854762040275e-29
ENSG00000000419	DPM1	6.38796984945415e-34	-0.617693	0.388	0.525	1.37494663039651e-29
ENSG00000105379	ETFB	6.4314038039058e-34	0.968920723715941	0.154	0.053	1.38429535475268e-29
ENSG00000170881	RNF139	6.54952914783304e-34	-0.804524	0.139	0.285	1.40972065377958e-29
ENSG00000138078	PREPL	7.41592084001859e-34	-0.972948	0.07	0.197	1.5962028016056e-29
ENSG00000110911	SLC11A2	7.54641950526022e-34	-1.51953	0.051	0.166	1.62429133431221e-29
ENSG00000162545	CAMK2N1	8.57366977139043e-34	0.734718846444294	0.204	0.086	1.84539668159408e-29
ENSG00000141232	TOB1	9.97583525729562e-34	-0.741165	0.335	0.484	2.14719878078031e-29
ENSG00000111678	C12orf57	1.09276325264023e-33	0.498995449581247	0.301	0.158	2.35206362498282e-29
ENSG00000166012	TAF1D	1.13215685177041e-33	-0.52074	0.355	0.511	2.43685440775062e-29
ENSG00000116954	RRAGC	1.24644036514595e-33	-0.635715	0.241	0.403	2.68283824194014e-29
ENSG00000083223	TUT7	1.4063732134881e-33	-0.708582	0.272	0.421	3.02707770471179e-29
ENSG00000178750	STX19	1.43697401574678e-33	-1.17891	0.046	0.161	3.09294287149337e-29
ENSG00000114331	ACAP2	1.46293634223943e-33	-1.08673	0.091	0.222	3.14882418303615e-29
ENSG00000179833	SERTAD2	1.5478579398193e-33	-0.992495	0.196	0.342	3.33160942966705e-29
ENSG00000049656	CLPTM1L	1.55279727603846e-33	-0.911152	0.115	0.258	3.34224085694519e-29
ENSG00000138271	GPR87	1.64177489425993e-33	-0.850657	0.094	0.226	3.53375628240508e-29
ENSG00000180817	PPA1	1.89802647879733e-33	0.815144981149101	0.221	0.1	4.08531219296338e-29
ENSG00000080802	CNOT4	1.92412360366524e-33	-0.947549	0.077	0.204	4.14148364452906e-29
ENSG00000152492	CCDC50	1.92568317757839e-33	0.917653124833702	0.239	0.114	4.14484047141972e-29
ENSG00000111786	SRSF9	2.01348228398899e-33	-0.637711	0.297	0.444	4.33381926805791e-29
ENSG00000101856	PGRMC1	2.1045629488312e-33	-0.757231	0.14	0.286	4.52986129106428e-29
ENSG00000144824	PHLDB2	2.18024821604036e-33	-1.55124	0.047	0.159	4.69276626020528e-29
ENSG00000113615	SEC24A	2.28049414173704e-33	-0.697805	0.264	0.414	4.90853559067481e-29
ENSG00000198142	SOWAHC	2.28746823483668e-33	-0.947615	0.16	0.306	4.92354662866248e-29
ENSG00000184545	DUSP8	2.42390265503581e-33	-0.800221	0.168	0.324	5.21720807469908e-29
ENSG00000155959	VBP1	2.61143784732521e-33	-0.691658	0.166	0.316	5.62085882258279e-29
NA	C3orf58	2.67545429082819e-33	-1.08034	0.135	0.277	5.7586478155786e-29
ENSG00000036054	TBC1D23	2.9085150713395e-33	-0.71919	0.175	0.328	6.26028783955113e-29
ENSG00000179295	PTPN11	3.20185041819882e-33	-1.06381	0.098	0.232	6.89166284013113e-29
ENSG00000133703	KRAS	3.30140484354076e-33	-0.754367	0.118	0.261	7.10594378523714e-29
ENSG00000115310	RTN4	3.47022618019911e-33	-0.631033	0.449	0.572	7.46931483026056e-29
ENSG00000183963	SMTN	4.00340783090449e-33	-0.712559	0.327	0.468	8.61693501523882e-29
ENSG00000186844	LCE1A	4.12342054151187e-33	-1.38344	0.118	0.248	8.87525037355015e-29
ENSG00000173166	RAPH1	4.28979231062893e-33	-1.08603	0.079	0.204	9.23334896939771e-29
ENSG00000176105	YES1	5.05146702319452e-33	-0.944695	0.16	0.304	1.08727776207239e-28
ENSG00000189221	MAOA	5.21624110259542e-33	-0.696424	0.269	0.42	1.12274373492264e-28
ENSG00000109572	CLCN3	6.00787283236139e-33	-0.833873	0.189	0.337	1.29313454843747e-28
ENSG00000149809	TM7SF2	6.49662985431778e-33	-1.31198	0.049	0.161	1.39833460984336e-28
ENSG00000141552	ANAPC11	6.55220563997429e-33	0.69266266937025	0.361	0.222	1.41029674194807e-28
ENSG00000204389	HSPA1A	6.63049518964496e-33	-1.05688	0.405	0.551	1.42714778461918e-28
ENSG00000173334	TRIB1	6.74307145514029e-33	-1.02349	0.13	0.268	1.4513787000044e-28
ENSG00000090266	NDUFB2	6.92632711413043e-33	0.513507088191506	0.317	0.172	1.49082264804543e-28
ENSG00000171606	ZNF274	7.01515679947633e-33	-1.00929	0.098	0.23	1.50994234951929e-28
ENSG00000170759	KIF5B	7.37137567308662e-33	-0.703699	0.238	0.395	1.58661489987516e-28
ENSG00000121774	KHDRBS1	8.3738915191835e-33	-0.69249	0.189	0.341	1.80239641058906e-28
ENSG00000141644	MBD1	8.49181741239912e-33	-0.560396	0.383	0.527	1.82777877984479e-28
ENSG00000225484	NUTM2B-AS1	1.26735258421756e-32	-0.866431	0.12	0.26	2.72784970226988e-28
ENSG00000115998	C2orf42	1.30304301235052e-32	-0.753992	0.045	0.156	2.80466977978326e-28
ENSG00000103121	CMC2	1.32114147765107e-32	-0.717172	0.157	0.303	2.84362491649617e-28
ENSG00000153113	CAST	1.3394659933925e-32	-0.569153	0.473	0.579	2.88306660417801e-28
ENSG00000186625	KATNA1	1.42126075197662e-32	-1.03717	0.097	0.23	3.05912164255448e-28
ENSG00000198168	SVIP	1.53829154992205e-32	-0.726078	0.137	0.285	3.31101873205221e-28
NA	LINC00302	1.57665295097833e-32	0.563007998057019	0.383	0.235	3.39358781168576e-28
ENSG00000110066	KMT5B	1.60493560781769e-32	-0.670097	0.203	0.355	3.4544634022668e-28
ENSG00000136891	TEX10	2.01405325773709e-32	-0.8218	0.216	0.362	4.33504823195331e-28
ENSG00000118515	SGK1	2.03368918057041e-32	-0.618187	0.414	0.559	4.37731259225974e-28
ENSG00000169469	SPRR1B	2.03760663111371e-32	0.27146721783454	0.968	0.944	4.38574451280915e-28
ENSG00000120256	LRP11	2.38390351380637e-32	-1.03827	0.103	0.235	5.13111392311684e-28
ENSG00000055130	CUL1	2.41781799825667e-32	-0.816896	0.101	0.234	5.20411145944765e-28
ENSG00000073578	SDHA	2.61488436390621e-32	0.401338474659705	0.469	0.322	5.62827710487173e-28
ENSG00000068903	SIRT2	2.62677686070389e-32	-0.825797	0.176	0.319	5.65387451497905e-28
ENSG00000172270	BSG	2.70606019266904e-32	0.717083856636556	0.432	0.313	5.82452395870084e-28
ENSG00000107937	GTPBP4	3.07302206160771e-32	-0.796807	0.193	0.341	6.61437268540444e-28
ENSG00000126254	RBM42	3.38430175781799e-32	-0.640591	0.275	0.426	7.28437110352745e-28
ENSG00000197780	TAF13	3.42922318963883e-32	-0.633597	0.285	0.44	7.38105999337861e-28
ENSG00000091317	CMTM6	3.9652374532454e-32	-0.84288	0.157	0.3	8.53477709436539e-28
ENSG00000070961	ATP2B1	4.02147558172541e-32	-0.787222	0.086	0.218	8.65582404210577e-28
ENSG00000078140	UBE2K	4.05613785603898e-32	-0.712103	0.277	0.429	8.7304311213383e-28
ENSG00000204131	NHSL2	4.43315284125065e-32	0.862468963665202	0.301	0.173	9.54191817550791e-28
ENSG00000100836	PABPN1	4.8581648984856e-32	-0.788872	0.271	0.433	1.04567141275004e-27
ENSG00000152223	EPG5	5.0201998881065e-32	-0.571177	0.386	0.538	1.08054782391604e-27
ENSG00000081277	PKP1	5.2365501867544e-32	0.545001856913608	0.508	0.363	1.12711506219702e-27
ENSG00000135525	MAP7	5.41371571786047e-32	-0.991947	0.066	0.187	1.16524817111229e-27
ENSG00000109606	DHX15	5.54536963252731e-32	-0.665872	0.22	0.372	1.19358535970518e-27
ENSG00000134001	EIF2S1	5.85376049854099e-32	-0.788384	0.135	0.278	1.25996340970596e-27
ENSG00000083828	ZNF586	6.03377671853012e-32	-1.02759	0.055	0.169	1.29871010089642e-27
ENSG00000069849	ATP1B3	8.88536427405437e-32	-0.676686	0.286	0.438	1.91248580634746e-27
ENSG00000166508	MCM7	1.05680901303001e-31	-0.425905	0.312	0.475	2.2746757196458e-27
ENSG00000167553	TUBA1C	1.08668127001129e-31	-0.753956	0.38	0.508	2.3389727655723e-27
ENSG00000028203	VEZT	1.12036898378425e-31	-0.857141	0.108	0.242	2.41148220069723e-27
ENSG00000136930	PSMB7	1.22537331804395e-31	-0.607688	0.398	0.527	2.6374935297578e-27
ENSG00000166311	SMPD1	1.23973909448469e-31	-0.795605	0.26	0.397	2.66841442696885e-27
ENSG00000106245	BUD31	1.23986571349571e-31	-0.427509	0.556	0.652	2.66868696172816e-27
ENSG00000156639	ZFAND3	1.31890057193391e-31	-0.768565	0.255	0.408	2.83880159103055e-27
ENSG00000117691	NENF	1.44821744366357e-31	0.668906050510449	0.168	0.064	3.11714322574146e-27
ENSG00000255112	CHMP1B	1.51029705007753e-31	-0.502919	0.486	0.599	3.25076337058687e-27
ENSG00000163218	PGLYRP4	1.58188537415914e-31	-1.03183	0.128	0.261	3.40485007934014e-27
ENSG00000164695	CHMP4C	1.58531588607227e-31	-0.695768	0.211	0.358	3.41223391318196e-27
ENSG00000188508	KRTDAP	1.58838072104818e-31	-0.403486	0.922	0.978	3.41883066398409e-27
ENSG00000108848	LUC7L3	1.59298481435794e-31	-0.539548	0.504	0.602	3.42874051442404e-27
ENSG00000105974	CAV1	1.62449427655813e-31	-1.51569	0.046	0.154	3.49656148086372e-27
ENSG00000185664	PMEL	1.97739619235678e-31	0.95572153599186	0.183	0.076	4.25614756442873e-27
ENSG00000166016	ABTB2	2.01948167008485e-31	-1.27624	0.065	0.181	4.34673234669062e-27
ENSG00000196235	SUPT5H	2.13048143734867e-31	-0.860416	0.161	0.311	4.58564824574929e-27
ENSG00000213341	CHUK	2.2088681335466e-31	-1.30917	0.058	0.173	4.75436777064571e-27
ENSG00000140750	ARHGAP17	2.32379185679988e-31	-0.958334	0.088	0.213	5.00172959257606e-27
ENSG00000084463	WBP11	2.38642240308346e-31	-0.678764	0.114	0.252	5.13653558039683e-27
ENSG00000113712	CSNK1A1	2.54207773518057e-31	-0.524952	0.464	0.57	5.47156811720265e-27
ENSG00000163362	INAVA	2.60455851960503e-31	-0.960738	0.093	0.22	5.60605175759786e-27
ENSG00000175166	PSMD2	2.6169277695082e-31	-0.622201	0.331	0.475	5.63267533108946e-27
ENSG00000166401	SERPINB8	2.71003200432771e-31	-0.776477	0.17	0.312	5.83307288611496e-27
ENSG00000187079	TEAD1	2.77163466575978e-31	-0.597135	0.278	0.44	5.96566645458136e-27
ENSG00000182481	KPNA2	3.10293389769878e-31	-1.16921	0.154	0.29	6.67875492140685e-27
ENSG00000124762	CDKN1A	3.3356774733365e-31	-0.451188	0.653	0.712	7.17971219360949e-27
ENSG00000173230	GOLGB1	3.36165441425182e-31	-0.698431	0.16	0.31	7.23562496123563e-27
ENSG00000168653	NDUFS5	3.5281924734897e-31	0.592955623244727	0.373	0.231	7.59408147993923e-27
ENSG00000205302	SNX2	3.58943764966325e-31	-0.675179	0.166	0.312	7.72590559713518e-27
ENSG00000126067	PSMB2	4.7220726828369e-31	-0.907064	0.173	0.315	1.01637892425382e-26
ENSG00000162385	MAGOH	4.74106500394023e-31	-0.597471	0.236	0.397	1.0204668314481e-26
ENSG00000198840	MT-ND3	5.37832108338969e-31	0.346095281714637	0.877	0.788	1.1576298299888e-26
ENSG00000132155	RAF1	5.41913821938506e-31	-0.668436	0.219	0.368	1.16641531034044e-26
ENSG00000077984	CST7	5.59588337858692e-31	0.742465761415285	0.242	0.118	1.20445793840705e-26
ENSG00000163510	CWC22	5.86908629691313e-31	-0.725288	0.182	0.328	1.26326213454758e-26
ENSG00000173457	PPP1R14B	6.14309577290324e-31	0.829841372507615	0.218	0.101	1.32223993415969e-26
ENSG00000105821	DNAJC2	6.45496752312394e-31	-0.76162	0.072	0.194	1.3893672096772e-26
ENSG00000019995	ZRANB1	6.77394258738971e-31	-0.600735	0.329	0.484	1.45802340250976e-26
ENSG00000146066	HIGD2A	7.16062426150839e-31	0.737112364911164	0.286	0.156	1.54125276604707e-26
ENSG00000182774	RPS17	7.1869478902528e-31	0.175918262993754	0.661	0.558	1.54691866389801e-26
ENSG00000168994	PXDC1	7.34352758549645e-31	-1.02697	0.045	0.152	1.58062087750226e-26
ENSG00000158417	EIF5B	8.69119067613296e-31	-0.636317	0.305	0.459	1.87069188113086e-26
ENSG00000074800	ENO1	9.34062345703511e-31	0.403326510567278	0.488	0.344	2.01047579289224e-26
ENSG00000179094	PER1	9.40760121633412e-31	-0.526628	0.361	0.52	2.02489208580376e-26
ENSG00000108506	INTS2	9.88618743325867e-31	-0.817738	0.149	0.294	2.1279029831346e-26
ENSG00000120992	LYPLA1	1.12170014612926e-30	-0.75933	0.276	0.412	2.41434739452862e-26
ENSG00000118680	MYL12B	1.12918169384106e-30	-0.401709	0.699	0.751	2.43045067782349e-26
ENSG00000128524	ATP6V1F	1.13879701921886e-30	0.659574748450611	0.377	0.24	2.45114670416668e-26
ENSG00000160271	RALGDS	1.18865528402686e-30	-1.00806	0.162	0.301	2.55846163333942e-26
ENSG00000222041	CYTOR	1.24558732280036e-30	0.553976617500563	0.418	0.268	2.6810021535955e-26
ENSG00000126460	PRRG2	1.32652138283487e-30	-0.860629	0.069	0.188	2.85520462441377e-26
ENSG00000138750	NUP54	1.46939904796229e-30	-0.840264	0.088	0.215	3.16273451083403e-26
ENSG00000100345	MYH9	1.49641308391578e-30	1.01592198844728	0.165	0.064	3.22087952182032e-26
ENSG00000182261	NLRP10	1.6505182342341e-30	-0.85545	0.138	0.275	3.55257544736547e-26
ENSG00000196792	STRN3	1.77278814978248e-30	-0.673677	0.124	0.262	3.8157492135918e-26
ENSG00000105402	NAPA	1.77696299977161e-30	-0.610146	0.371	0.503	3.82473516070842e-26
ENSG00000074416	MGLL	1.78952296073611e-30	-0.750979	0.261	0.4	3.8517692206884e-26
ENSG00000112739	PRPF4B	1.81622995267017e-30	-0.574401	0.247	0.4	3.90925335012728e-26
ENSG00000111790	FGFR1OP2	2.06447560530631e-30	-0.73002	0.143	0.285	4.4435772928613e-26
ENSG00000257878	AC007298.2	2.29438619112375e-30	-1.17692	0.066	0.181	4.93843683777476e-26
ENSG00000089327	FXYD5	2.32109846284757e-30	0.574574535396588	0.309	0.171	4.9959323314331e-26
ENSG00000118495	PLAGL1	2.32451942667126e-30	-1.15503	0.046	0.151	5.00329561396722e-26
ENSG00000179889	PDXDC1	2.85637127845463e-30	-0.68182	0.096	0.227	6.14805353974575e-26
ENSG00000119801	YPEL5	3.09216662022387e-30	-0.433901	0.564	0.646	6.65557943336986e-26
ENSG00000260260	SNHG19	3.33072908175204e-30	0.22667113675881	0.186	0.076	7.16906127556309e-26
ENSG00000156232	WHAMM	3.45825387018091e-30	-0.526684	0.167	0.314	7.44354563017739e-26
ENSG00000189308	LIN54	3.55740701274998e-30	-0.98018	0.086	0.208	7.65696285424307e-26
ENSG00000178307	TMEM11	3.59857741929474e-30	-0.511402	0.102	0.234	7.74557803729e-26
ENSG00000106400	ZNHIT1	3.99839185434207e-30	0.820287122491091	0.227	0.11	8.60613862728588e-26
ENSG00000132510	KDM6B	4.1750058894625e-30	-1.48363	0.075	0.19	8.98628267647909e-26
ENSG00000205629	LCMT1	4.41359866324769e-30	-0.931303	0.112	0.241	9.49982976277434e-26
ENSG00000171365	CLCN5	4.77370504380751e-30	-0.805993	0.165	0.303	1.02749227362913e-25
ENSG00000168259	DNAJC7	5.49407401521849e-30	-0.583123	0.192	0.34	1.18254449103563e-25
ENSG00000138050	THUMPD2	5.51472414414e-30	-0.878021	0.091	0.216	1.18698922478469e-25
NA	SSFA2	6.64350737440082e-30	-0.574607	0.354	0.499	1.42994852726603e-25
ENSG00000134684	YARS	7.28354777539904e-30	-0.777073	0.063	0.177	1.56771082317689e-25
ENSG00000153879	CEBPG	7.36165610070963e-30	-0.809458	0.115	0.245	1.58452285911674e-25
ENSG00000178363	CALML3	7.39756934779741e-30	0.921693820907684	0.166	0.065	1.59225282641991e-25
ENSG00000116016	EPAS1	7.45566821767668e-30	-0.74638	0.137	0.276	1.60475802717273e-25
ENSG00000104067	TJP1	7.62748381946468e-30	-0.499009	0.413	0.542	1.64173961730158e-25
ENSG00000172590	MRPL52	7.82701890726916e-30	0.785087891379379	0.21	0.096	1.68468754960061e-25
ENSG00000103769	RAB11A	8.20239878128864e-30	-0.608665	0.42	0.536	1.76548431368457e-25
ENSG00000100138	SNU13	8.43842824708591e-30	-0.628822	0.392	0.524	1.81628729590277e-25
ENSG00000013275	PSMC4	8.67522620953382e-30	-0.612109	0.333	0.475	1.86725568934006e-25
ENSG00000177042	TMEM80	9.15835470086813e-30	-0.874043	0.197	0.339	1.97124426581486e-25
ENSG00000155324	GRAMD2B	9.24098060858728e-30	-0.961606	0.157	0.29	1.98902866619233e-25
ENSG00000087502	ERGIC2	9.36558119123361e-30	-0.765261	0.128	0.26	2.01584769560112e-25
ENSG00000151743	AMN1	1.00909248273124e-29	1.28147693831829	0.185	0.083	2.17197065983072e-25
ENSG00000006576	PHTF2	1.09703330451498e-29	-0.82662	0.118	0.25	2.36125448463804e-25
ENSG00000163625	WDFY3	1.16758592098644e-29	-1.22476	0.061	0.171	2.51311193633122e-25
ENSG00000242372	EIF6	1.21086921071372e-29	-0.545666	0.518	0.603	2.6062748891402e-25
ENSG00000104824	HNRNPL	1.23908015003387e-29	-0.685845	0.116	0.251	2.6669961149329e-25
ENSG00000197498	RPF2	1.25928979245368e-29	-1.14115	0.062	0.172	2.7104953492773e-25
ENSG00000153774	CFDP1	1.30181638638401e-29	-0.682489	0.126	0.261	2.80202959005294e-25
ENSG00000134248	LAMTOR5	1.38070644176896e-29	-0.522613	0.428	0.557	2.97183254526351e-25
ENSG00000141562	NARF	1.4380685912161e-29	0.982091593326713	0.233	0.118	3.09529883573353e-25
ENSG00000107929	LARP4B	1.49862279374974e-29	-0.761244	0.155	0.297	3.22563570126695e-25
ENSG00000161526	SAP30BP	1.53334059492883e-29	-0.65959	0.272	0.416	3.30036229652482e-25
ENSG00000099800	TIMM13	1.57206237849533e-29	0.850660767863355	0.18	0.076	3.38370706347334e-25
ENSG00000163938	GNL3	1.58719839411765e-29	-0.631452	0.082	0.204	3.41628582349884e-25
ENSG00000112414	ADGRG6	1.61368811236282e-29	1.03502807462713	0.175	0.073	3.47330229304974e-25
ENSG00000124171	PARD6B	1.96997106985809e-29	-0.715762	0.236	0.381	4.24016573076256e-25
ENSG00000224531	SMIM13	2.00243352648694e-29	-1.07287	0.048	0.154	4.31003792241049e-25
ENSG00000196352	CD55	2.01487505016788e-29	-0.986494	0.327	0.455	4.33681705798134e-25
ENSG00000117758	STX12	2.08257019271559e-29	-0.753188	0.134	0.265	4.48252408280103e-25
ENSG00000122644	ARL4A	2.32366445426265e-29	-0.836979	0.134	0.269	5.00145537135494e-25
ENSG00000166197	NOLC1	2.41143435903844e-29	-0.744465	0.127	0.262	5.19037131439435e-25
ENSG00000127952	STYXL1	2.50674796408733e-29	-0.977596	0.114	0.239	5.39552431790157e-25
ENSG00000173960	UBXN2A	2.57880132637682e-29	-0.733989	0.089	0.211	5.55061197489347e-25
ENSG00000036672	USP2	2.93646020730188e-29	-1.61598	0.073	0.183	6.32043695019657e-25
ENSG00000203837	PNLIPRP3	3.2562073600002e-29	-0.791427	0.281	0.42	7.00866072166442e-25
ENSG00000206573	THUMPD3-AS1	3.38641682156803e-29	-0.658144	0.214	0.363	7.28892356674302e-25
ENSG00000119778	ATAD2B	3.54986015198018e-29	-1.2397	0.058	0.167	7.64071899112214e-25
ENSG00000159388	BTG2	3.5664874222269e-29	-1.08239	0.108	0.232	7.67650752760117e-25
ENSG00000131981	LGALS3	3.84917196082174e-29	0.472556023410516	0.566	0.431	8.28495772847272e-25
ENSG00000099331	MYO9B	4.01494122411056e-29	0.621164515260031	0.22	0.105	8.64175949077556e-25
ENSG00000130313	PGLS	4.55853683229793e-29	0.998589789896336	0.203	0.094	9.81179467783806e-25
ENSG00000116273	PHF13	4.58391029523761e-29	-0.816866	0.074	0.193	9.86640851946943e-25
NA	RAB30-AS1	4.83465102797475e-29	-1.02462	0.081	0.199	1.04061028726129e-24
ENSG00000131503	ANKHD1	4.85311274582327e-29	-0.935511	0.072	0.188	1.044583987411e-24
ENSG00000143079	CTTNBP2NL	4.91572165317772e-29	-0.61982	0.133	0.267	1.05805992862997e-24
ENSG00000177054	ZDHHC13	4.98781028015362e-29	-0.998595	0.116	0.24	1.07357628470027e-24
ENSG00000089248	ERP29	5.73971232715371e-29	0.76950227989288	0.194	0.086	1.23541568129656e-24
ENSG00000120690	ELF1	6.0849110584692e-29	-0.540976	0.238	0.386	1.30971625622491e-24
ENSG00000119541	VPS4B	6.12832441143894e-29	-0.537411	0.44	0.548	1.31906054631812e-24
ENSG00000093167	LRRFIP2	6.18406042115198e-29	-0.733523	0.246	0.384	1.33105716504875e-24
ENSG00000114315	HES1	6.21705968551424e-29	-0.444988	0.332	0.483	1.33815992671009e-24
ENSG00000140992	PDPK1	6.45003422913877e-29	-0.965255	0.098	0.222	1.38830536747983e-24
ENSG00000078142	PIK3C3	6.50144664115397e-29	-0.643257	0.107	0.232	1.39937137504198e-24
ENSG00000126267	COX6B1	7.15141442285723e-29	0.407534684669913	0.594	0.491	1.53927044037579e-24
ENSG00000251022	THAP9-AS1	7.47570962304341e-29	-0.693791	0.111	0.24	1.60907173926386e-24
ENSG00000275832	ARHGAP23	8.03193455651838e-29	-0.862732	0.073	0.188	1.72879359394502e-24
ENSG00000256087	ZNF432	8.37490521408172e-29	-1.08487	0.051	0.157	1.80261459827895e-24
ENSG00000117523	PRRC2C	8.40930897453566e-29	-0.511349	0.33	0.471	1.81001966367906e-24
ENSG00000065491	TBC1D22B	9.48177508210326e-29	-0.740046	0.144	0.279	2.0408572686719e-24
ENSG00000163636	PSMD6	1.00061276225951e-28	-0.770218	0.108	0.234	2.15371890948736e-24
ENSG00000112378	PERP	1.10125024227601e-28	0.493605806824086	0.785	0.751	2.37033102147488e-24
ENSG00000182372	CLN8	1.16983144762394e-28	-0.769844	0.116	0.244	2.51794520786576e-24
ENSG00000114023	FAM162A	1.21914316089358e-28	0.890493681809899	0.342	0.222	2.62408373950734e-24
ENSG00000153317	ASAP1	1.32810465899214e-28	-0.707027	0.129	0.262	2.85861246801468e-24
ENSG00000132950	ZMYM5	1.54505085859084e-28	-0.978866	0.1	0.223	3.32556746803092e-24
ENSG00000088387	DOCK9	1.60177420217002e-28	-0.939735	0.139	0.269	3.44765879275076e-24
ENSG00000067560	RHOA	1.72616334430975e-28	-0.38627	0.584	0.66	3.71539398229232e-24
ENSG00000133678	TMEM254	1.79354040907112e-28	-1.06573	0.153	0.277	3.86041637648468e-24
ENSG00000145247	OCIAD2	1.90037248142358e-28	1.07887004018397	0.168	0.069	4.09036172901612e-24
ENSG00000106462	EZH2	2.28783206541207e-28	-0.808555	0.143	0.275	4.92432973759295e-24
ENSG00000072415	MPP5	2.4834064568161e-28	-0.96019	0.102	0.225	5.34528405765097e-24
ENSG00000093000	NUP50	2.5215407527371e-28	-0.708952	0.186	0.33	5.42736431619134e-24
ENSG00000095574	IKZF5	2.58038453333058e-28	-0.615484	0.158	0.298	5.55401966954074e-24
ENSG00000167772	ANGPTL4	2.75355320201797e-28	0.794711734217331	0.388	0.258	5.92674791202349e-24
ENSG00000105141	CASP14	2.85875835937619e-28	-0.911463	0.153	0.28	6.15319149272132e-24
ENSG00000158246	TENT5B	3.11686273790779e-28	-0.792589	0.299	0.426	6.70873535707272e-24
ENSG00000069020	MAST4	3.1570137959305e-28	-1.01245	0.094	0.213	6.79515649436081e-24
ENSG00000161057	PSMC2	3.58909386922595e-28	-0.724024	0.086	0.206	7.72516564412194e-24
ENSG00000082701	GSK3B	3.59687002322965e-28	-1.04877	0.08	0.194	7.74190303799951e-24
ENSG00000101745	ANKRD12	3.64494452679663e-28	-0.43334	0.284	0.44	7.84537859947707e-24
ENSG00000175592	FOSL1	3.74208435874879e-28	-0.789638	0.233	0.368	8.0544623737709e-24
ENSG00000139620	KANSL2	3.9863367229791e-28	-0.808302	0.099	0.223	8.58019116254021e-24
ENSG00000113070	HBEGF	4.05158690943181e-28	-0.66157	0.289	0.424	8.72063566386103e-24
ENSG00000126803	HSPA2	4.35023781316294e-28	-0.953651	0.107	0.227	9.36345186905192e-24
ENSG00000179148	ALOXE3	5.45407340731175e-28	-0.804903	0.25	0.385	1.17393476018978e-23
ENSG00000089009	RPL6	5.61677595833838e-28	0.271434929979971	0.754	0.669	1.20895485727275e-23
ENSG00000162366	PDZK1IP1	6.69267094526918e-28	1.27779987605167	0.186	0.085	1.44053049425974e-23
ENSG00000184678	HIST2H2BE	7.91716548810396e-28	-0.673667	0.203	0.34	1.7040906996595e-23
ENSG00000155744	FAM126B	9.29298265054002e-28	-0.703405	0.247	0.385	2.00022158570223e-23
ENSG00000165119	HNRNPK	9.53008377485748e-28	-0.435597	0.57	0.65	2.05125523170032e-23
ENSG00000129226	CD68	1.02912309768171e-27	0.922264105644504	0.267	0.151	2.21508455545012e-23
ENSG00000188522	FAM83G	1.05714721305461e-27	-0.998094	0.068	0.176	2.27540366137875e-23
ENSG00000090520	DNAJB11	1.06142095516346e-27	-0.665089	0.108	0.231	2.28460246389384e-23
ENSG00000005812	FBXL3	1.07521574967483e-27	-0.618994	0.103	0.229	2.31429437960011e-23
ENSG00000145879	SPINK7	1.08191724919425e-27	0.446815734713713	0.245	0.118	2.32871868716571e-23
ENSG00000143294	PRCC	1.22956835068802e-27	-0.629712	0.086	0.205	2.64652291802089e-23
ENSG00000244734	HBB	1.26878145257709e-27	-2.51702	0.069	0.173	2.73092519852694e-23
ENSG00000110700	RPS13	1.32362946164005e-27	0.188613856947807	0.908	0.853	2.84898005323404e-23
ENSG00000175416	CLTB	1.33620971772893e-27	-0.333942	0.713	0.772	2.87605779643974e-23
ENSG00000260708	AL118516.1	1.48414034398593e-27	-0.75473	0.199	0.338	3.19446367639532e-23
ENSG00000080345	RIF1	1.5600125102913e-27	-0.727791	0.088	0.209	3.357770927151e-23
ENSG00000122068	FYTTD1	1.59445489665403e-27	-0.610244	0.188	0.325	3.43190471955814e-23
ENSG00000168710	AHCYL1	1.73049778671388e-27	-0.789295	0.266	0.409	3.72472343612297e-23
ENSG00000135316	SYNCRIP	1.81842764245703e-27	-0.562786	0.294	0.437	3.91398365762452e-23
ENSG00000157954	WIPI2	1.83172383184112e-27	-0.519103	0.468	0.571	3.94260237565482e-23
ENSG00000028839	TBPL1	1.92628724121289e-27	-0.812534	0.141	0.268	4.14614065798663e-23
ENSG00000046651	OFD1	2.01311054031969e-27	-0.706517	0.16	0.292	4.3330191269841e-23
ENSG00000109536	FRG1	2.21819061981789e-27	-0.654969	0.209	0.347	4.77443349009602e-23
ENSG00000135404	CD63	2.53819396048235e-27	0.404279337065092	0.546	0.405	5.46320868054222e-23
ENSG00000118200	CAMSAP2	2.60313498259263e-27	-0.955	0.097	0.215	5.60298773653237e-23
ENSG00000188342	GTF2F2	2.70410442047048e-27	-0.584382	0.217	0.358	5.82031435462065e-23
ENSG00000006327	TNFRSF12A	2.88939553148405e-27	-0.475294	0.553	0.652	6.21913494196626e-23
ENSG00000126457	PRMT1	2.90564442985498e-27	-0.955698	0.079	0.193	6.25410907081986e-23
ENSG00000115963	RND3	4.37401010447342e-27	-0.765067	0.31	0.439	9.41461934886858e-23
ENSG00000182628	SKA2	4.77004606227624e-27	-0.6295	0.148	0.283	1.02670471444434e-22
ENSG00000029363	BCLAF1	5.14329421902352e-27	-0.586809	0.247	0.393	1.10704264770262e-22
ENSG00000100614	PPM1A	5.3729859949966e-27	-0.541688	0.265	0.409	1.15648150556307e-22
ENSG00000169813	HNRNPF	5.52837733082732e-27	-0.529062	0.268	0.408	1.18992793668727e-22
ENSG00000042753	AP2S1	5.60833309201725e-27	0.496254911805516	0.417	0.287	1.20713761472579e-22
ENSG00000278311	GGNBP2	5.85608616504897e-27	-0.755096	0.09	0.209	1.26046398616514e-22
ENSG00000101126	ADNP	6.17260407622771e-27	-0.583547	0.186	0.327	1.32859130136725e-22
ENSG00000189067	LITAF	6.60208308994078e-27	-0.652182	0.412	0.516	1.42103236427885e-22
ENSG00000213064	SFT2D2	9.34600972668446e-27	-0.71124	0.246	0.379	2.01163513357156e-22
ENSG00000164040	PGRMC2	9.67181243989811e-27	-0.909643	0.132	0.257	2.08176090956367e-22
ENSG00000167914	GSDMA	1.03665682852629e-26	-0.584003	0.383	0.508	2.23130015771998e-22
ENSG00000154710	RABGEF1	1.05720844323379e-26	-0.674441	0.13	0.256	2.27553545321642e-22
ENSG00000110717	NDUFS8	1.18424737017555e-26	0.694031597748429	0.223	0.112	2.54897403956585e-22
ENSG00000107290	SETX	1.36435828969493e-26	-1.19667	0.151	0.28	2.93664478273937e-22
ENSG00000010017	RANBP9	1.38148050274039e-26	-0.691404	0.259	0.396	2.9734986340984e-22
ENSG00000130749	ZC3H4	1.39701035194852e-26	-0.910887	0.107	0.228	3.006925081534e-22
ENSG00000147604	RPL7	1.49047960133653e-26	0.214689816338357	0.856	0.804	3.20810829391674e-22
ENSG00000184330	S100A7A	1.51568978159039e-26	0.957044310097014	0.188	0.087	3.26237068589515e-22
ENSG00000152409	JMY	1.51659388928932e-26	-0.637006	0.146	0.28	3.26431668730634e-22
ENSG00000168036	CTNNB1	1.64574491242598e-26	-0.716633	0.268	0.399	3.54230134950567e-22
ENSG00000101782	RIOK3	1.65673695388598e-26	-0.453816	0.457	0.577	3.56596061954419e-22
ENSG00000135378	PRRG4	1.76684827785528e-26	-0.528325	0.307	0.452	3.80296423325571e-22
ENSG00000128908	INO80	1.97497089769905e-26	-0.831639	0.067	0.173	4.25092736020743e-22
ENSG00000100883	SRP54	2.03597683243588e-26	-0.680184	0.148	0.277	4.38223653413499e-22
ENSG00000163605	PPP4R2	2.40029380377013e-26	-0.719219	0.129	0.255	5.16639238323483e-22
ENSG00000168137	SETD5	2.79016024447677e-26	-0.702876	0.116	0.241	6.00554091021179e-22
ENSG00000122705	CLTA	3.01698551490177e-26	-0.389479	0.596	0.676	6.49375962227457e-22
ENSG00000066422	ZBTB11	3.3566903508338e-26	-0.926107	0.079	0.19	7.22494031113467e-22
ENSG00000143543	JTB	3.92560086400056e-26	0.758611396022618	0.259	0.144	8.44946329967481e-22
ENSG00000173264	GPR137	4.14341159757794e-26	-0.923054	0.063	0.167	8.91827912262675e-22
ENSG00000140153	WDR20	4.3708550940023e-26	-0.779073	0.154	0.282	9.40782850433056e-22
ENSG00000164919	COX6C	4.43254367532548e-26	0.440448465152259	0.513	0.384	9.54060700677056e-22
ENSG00000036257	CUL3	4.44205532410723e-26	-0.552641	0.279	0.418	9.56107987960839e-22
ENSG00000171475	WIPF2	4.49202461928078e-26	-0.718428	0.184	0.319	9.66863379053995e-22
ENSG00000105518	TMEM205	4.57872173831907e-26	-0.852167	0.094	0.207	9.85524066955798e-22
ENSG00000157540	DYRK1A	4.7301555640045e-26	-0.778937	0.11	0.232	1.01811868359633e-21
ENSG00000244617	ASPRV1	5.1551232239181e-26	0.438876910479929	0.438	0.308	1.10958872271613e-21
ENSG00000179859	RNF227	5.60968853703518e-26	-0.895497	0.153	0.278	1.20742936071145e-21
ENSG00000142534	RPS11	6.09931116903806e-26	0.218270163988472	0.836	0.811	1.31281573602375e-21
ENSG00000154265	ABCA5	6.69358453147182e-26	-1.06902	0.098	0.213	1.44072713455399e-21
ENSG00000130939	UBE4B	6.82419614437392e-26	-0.534559	0.237	0.374	1.46883997811504e-21
ENSG00000064961	HMG20B	6.85543152513263e-26	0.430710307113178	0.457	0.317	1.47556308146955e-21
ENSG00000141429	GALNT1	7.16239764415932e-26	-0.660858	0.109	0.229	1.54163446892885e-21
ENSG00000187193	MT1X	7.22823038668811e-26	-0.687606	0.273	0.135	1.55580430843075e-21
ENSG00000272009	AL121944.1	7.81109839701439e-26	-0.689037	0.138	0.265	1.68126081897338e-21
ENSG00000157764	BRAF	7.93979991346558e-26	-0.561876	0.279	0.415	1.70896253337433e-21
ENSG00000134825	TMEM258	8.00855365946724e-26	0.566216255156477	0.473	0.347	1.72376108966373e-21
ENSG00000167644	C19orf33	9.02510911008564e-26	0.6746942804909	0.427	0.321	1.94256448485483e-21
ENSG00000145349	CAMK2D	9.30837342390875e-26	-0.796484	0.144	0.268	2.00353429576212e-21
ENSG00000145901	TNIP1	9.68178367513712e-26	-0.850995	0.222	0.35	2.08390711823651e-21
ENSG00000113460	BRIX1	9.98502623877138e-26	-0.674501	0.075	0.184	2.14917704763315e-21
ENSG00000196924	FLNA	1.10719421020879e-25	0.500044554810077	0.233	0.119	2.3831248180534e-21
ENSG00000197976	AKAP17A	1.15077101565616e-25	-0.617891	0.138	0.268	2.47691953409832e-21
ENSG00000285106	AC016831.7	1.22075795218901e-25	-1.14007	0.063	0.164	2.62755941629162e-21
ENSG00000120948	TARDBP	1.25336246407082e-25	-0.550176	0.318	0.448	2.69773736766604e-21
ENSG00000258279	LINC00592	1.31307433925537e-25	-0.867791	0.148	0.268	2.82626120781325e-21
ENSG00000116212	LRRC42	1.39804454910696e-25	-0.839037	0.058	0.159	3.00915108749782e-21
ENSG00000072818	ACAP1	1.43019377833353e-25	1.17285246346122	0.206	0.105	3.07834908848509e-21
ENSG00000104517	UBR5	1.56539146107674e-25	-0.717209	0.246	0.387	3.36934858082158e-21
ENSG00000030582	GRN	1.611905799104e-25	0.588324010923917	0.2	0.096	3.46946604199146e-21
ENSG00000116741	RGS2	1.61720492521995e-25	-1.20915	0.151	0.269	3.48087188104343e-21
NA	RAMMET	1.82512973959009e-25	-0.461128	0.419	0.53	3.92840925149371e-21
ENSG00000141447	OSBPL1A	2.00139174514663e-25	-0.720548	0.143	0.267	4.3077955922536e-21
ENSG00000134909	ARHGAP32	2.21289126120541e-25	-0.633073	0.27	0.406	4.76302715061851e-21
ENSG00000165030	NFIL3	2.37052631336253e-25	-0.706425	0.127	0.249	5.10232083688151e-21
ENSG00000102970	CCL17	2.47325293919492e-25	0.215447447873864	0.219	0.105	5.32342962632316e-21
ENSG00000047249	ATP6V1H	2.52382127718174e-25	-0.612193	0.2	0.332	5.43227291700597e-21
ENSG00000167193	CRK	2.85931555496856e-25	-0.725617	0.19	0.316	6.15439080051433e-21
ENSG00000108510	MED13	2.96737149537424e-25	-0.595272	0.269	0.407	6.38697040664352e-21
ENSG00000166535	A2ML1	3.07702001933769e-25	1.21961717211251	0.233	0.13	6.62297788962244e-21
ENSG00000107651	SEC23IP	3.33577217234919e-25	-0.903128	0.074	0.181	7.17991602376441e-21
ENSG00000121542	SEC22A	3.42864258431122e-25	-0.91858	0.069	0.172	7.37981029847147e-21
ENSG00000143367	TUFT1	3.53291046766472e-25	-0.504837	0.379	0.51	7.60423649060154e-21
ENSG00000167325	RRM1	3.93915060121206e-25	-0.763026	0.084	0.193	8.47862775404884e-21
ENSG00000020577	SAMD4A	4.07063577376626e-25	-1.03565	0.067	0.169	8.76163643945449e-21
ENSG00000135018	UBQLN1	4.26856714489607e-25	-0.767746	0.165	0.29	9.18766392267429e-21
ENSG00000156976	EIF4A2	4.94555270744426e-25	-0.272139	0.722	0.783	1.0644807647503e-20
ENSG00000078018	MAP2	5.31866067013705e-25	-0.812188	0.091	0.201	1.1447885226403e-20
ENSG00000130724	CHMP2A	5.35233413923107e-25	-0.381874	0.556	0.637	1.15203640012809e-20
ENSG00000134644	PUM1	5.65733312414868e-25	-0.526567	0.269	0.413	1.21768438164176e-20
ENSG00000100170	SLC5A1	6.00420646211857e-25	-1.0246	0.135	0.25	1.2923453989064e-20
ENSG00000272886	DCP1A	6.0592155368363e-25	-0.55608	0.117	0.238	1.30418555214864e-20
ENSG00000178691	SUZ12	7.74800597023873e-25	-0.526509	0.126	0.25	1.66768080503418e-20
ENSG00000148303	RPL7A	8.00603544068397e-25	0.288645178377365	0.757	0.699	1.72321906825282e-20
ENSG00000125691	RPL23	8.12507304886909e-25	0.378249421896714	0.67	0.573	1.74884072303858e-20
ENSG00000173273	TNKS	8.32678660159872e-25	-1.02774	0.077	0.181	1.79225754812811e-20
ENSG00000171634	BPTF	8.44520517634526e-25	-0.709029	0.159	0.287	1.81774596215655e-20
ENSG00000256222	MTRNR2L3	9.1911571789517e-25	1.10893070145136	0.196	0.097	1.97830467119756e-20
ENSG00000148154	UGCG	9.54721448701546e-25	-0.736444	0.368	0.485	2.05494244618521e-20
ENSG00000011405	PIK3C2A	9.71789953323104e-25	-0.667572	0.176	0.304	2.09168069553265e-20
ENSG00000163738	MTHFD2L	1.06010279426517e-24	-0.599567	0.061	0.16	2.28176525437635e-20
ENSG00000174373	RALGAPA1	1.14402695694687e-24	-0.789767	0.058	0.157	2.46240362213244e-20
ENSG00000143545	RAB13	1.15553591211259e-24	0.571684010063256	0.228	0.12	2.48717549723113e-20
ENSG00000135486	HNRNPA1	1.16038097172766e-24	-0.475723	0.465	0.581	2.49760400354662e-20
ENSG00000142864	SERBP1	1.24484718198423e-24	-0.481856	0.325	0.455	2.67940907450287e-20
ENSG00000186847	KRT14	1.25544149877155e-24	0.0210090264766425	0.365	0.209	2.70221228195589e-20
ENSG00000156110	ADK	1.34872134429943e-24	-0.606452	0.184	0.311	2.90298782147009e-20
ENSG00000157181	ODR4	1.54088331670971e-24	-0.872175	0.094	0.203	3.31659725088597e-20
ENSG00000151422	FER	1.54971735155104e-24	-0.907118	0.073	0.177	3.33561162747846e-20
ENSG00000158411	MITD1	1.55673581744255e-24	-1.01023	0.07	0.171	3.35071817346335e-20
ENSG00000169230	PRELID1	1.57633144621343e-24	-0.543253	0.417	0.527	3.39289580482978e-20
ENSG00000090615	GOLGA3	1.63698395257035e-24	-1.19136	0.063	0.16	3.52344425951243e-20
ENSG00000273559	CWC25	1.64049575140569e-24	-0.438523	0.448	0.545	3.5310030553256e-20
ENSG00000172345	STARD5	1.72756736683001e-24	-0.97345	0.068	0.166	3.71841600036491e-20
ENSG00000174173	TRMT10C	1.74718882340621e-24	-0.758824	0.086	0.196	3.76064922349953e-20
ENSG00000138600	SPPL2A	1.75375474577359e-24	-0.72755	0.151	0.272	3.77478171480307e-20
ENSG00000107262	BAG1	1.81111749748253e-24	-0.378143	0.421	0.549	3.89824930158141e-20
ENSG00000049860	HEXB	1.92131606510789e-24	-0.739873	0.183	0.308	4.13544069853822e-20
ENSG00000081154	PCNP	1.95347315583347e-24	-0.457594	0.257	0.391	4.20465562061596e-20
ENSG00000118418	HMGN3	1.99525217912815e-24	0.401169964247196	0.218	0.109	4.29458079035544e-20
ENSG00000111596	CNOT2	2.11058562701656e-24	-0.499692	0.383	0.497	4.54282450359044e-20
ENSG00000125733	TRIP10	2.20543979118605e-24	-0.817231	0.155	0.278	4.74698860654886e-20
ENSG00000074964	ARHGEF10L	2.24649013962736e-24	-0.855155	0.116	0.229	4.83534537653392e-20
ENSG00000156256	USP16	2.3850960626283e-24	-0.499137	0.161	0.291	5.13368076520116e-20
ENSG00000114126	TFDP2	2.47566022515938e-24	-0.746529	0.057	0.154	5.32861106863306e-20
ENSG00000124216	SNAI1	3.04883682490208e-24	-0.893724	0.232	0.354	6.56231638191924e-20
ENSG00000115966	ATF2	3.12690051129313e-24	-0.652577	0.071	0.174	6.73034066050732e-20
ENSG00000137814	HAUS2	3.14806216586759e-24	-0.688951	0.119	0.236	6.77588900581339e-20
ENSG00000275066	SYNRG	3.20402823367936e-24	-0.49522	0.201	0.336	6.89635037017146e-20
ENSG00000153815	CMIP	3.32571693082578e-24	-0.747653	0.224	0.354	7.15827312190942e-20
ENSG00000103035	PSMD7	3.56869631358331e-24	-0.550284	0.204	0.334	7.68126194535673e-20
ENSG00000185158	LRRC37B	3.58019414413772e-24	-0.478906	0.057	0.155	7.70600987584204e-20
ENSG00000123728	RAP2C	3.5956513275529e-24	-0.825015	0.069	0.168	7.73927991742486e-20
ENSG00000102024	PLS3	4.31329753183248e-24	-0.60835	0.305	0.43	9.28394160751624e-20
ENSG00000105085	MED26	4.38898935213327e-24	-0.655577	0.089	0.198	9.44686068153166e-20
ENSG00000118217	ATF6	4.70358943291784e-24	-0.786275	0.069	0.171	1.01240058954124e-19
ENSG00000188021	UBQLN2	4.91136517504356e-24	-0.770595	0.119	0.235	1.05712224027638e-19
ENSG00000198355	PIM3	5.23471393243982e-24	-0.820137	0.149	0.268	1.12671982681835e-19
ENSG00000171612	SLC25A33	5.39253823322815e-24	-0.563984	0.211	0.34	1.16068992932003e-19
ENSG00000170248	PDCD6IP	5.44514313069007e-24	-0.472045	0.283	0.416	1.17201260744973e-19
ENSG00000128228	SDF2L1	5.50201525403221e-24	0.593859437794567	0.165	0.073	1.18425376327789e-19
ENSG00000015153	YAF2	5.5609773285358e-24	-0.695082	0.204	0.329	1.19694476019405e-19
ENSG00000160551	TAOK1	5.69579669136184e-24	-0.675937	0.146	0.27	1.22596327984872e-19
ENSG00000075292	ZNF638	5.71012557147332e-24	-0.59014	0.097	0.21	1.22904742800392e-19
ENSG00000055609	KMT2C	6.04933656218946e-24	-0.74376	0.11	0.225	1.30205920164566e-19
ENSG00000101367	MAPRE1	6.15514253851949e-24	-0.577337	0.349	0.459	1.32483287999093e-19
ENSG00000091164	TXNL1	7.10800674162689e-24	-0.559442	0.371	0.482	1.52992737106777e-19
ENSG00000128641	MYO1B	7.74754931810714e-24	-1.36033	0.064	0.158	1.66758251522938e-19
ENSG00000130803	ZNF317	8.45718925666758e-24	-0.686	0.069	0.17	1.82032541560513e-19
ENSG00000120686	UFM1	8.60933824329126e-24	-0.436093	0.467	0.571	1.85307396348601e-19
ENSG00000140307	GTF2A2	8.64441142460508e-24	-0.446276	0.336	0.462	1.860623115032e-19
ENSG00000173141	MRPL57	8.77649262117917e-24	0.905796350137872	0.16	0.072	1.88905227178261e-19
ENSG00000156482	RPL30	9.53097719268585e-24	0.0626946003809925	0.876	0.822	2.0514475309537e-19
ENSG00000186298	PPP1CC	9.57045828578081e-24	-0.403729	0.323	0.444	2.05994544143146e-19
ENSG00000132823	OSER1	1.15334824041591e-23	-0.291683	0.616	0.708	2.4824667526712e-19
ENSG00000198783	ZNF830	1.15490774511421e-23	-0.664807	0.143	0.264	2.48582343058384e-19
ENSG00000170043	TRAPPC1	1.16669724342096e-23	0.617958680425824	0.206	0.106	2.51119914673927e-19
ENSG00000067798	NAV3	1.34585186750568e-23	-0.812686	0.223	0.341	2.89681155961923e-19
ENSG00000158825	CDA	1.41488329566835e-23	-0.95397	0.065	0.16	3.04539480559656e-19
ENSG00000166923	GREM1	1.48168984405926e-23	0.723096670448275	0.186	0.089	3.18918922035314e-19
ENSG00000198862	LTN1	1.59724221336116e-23	-0.747331	0.065	0.163	3.43790414003856e-19
ENSG00000065978	YBX1	1.78005317054857e-23	-0.588428	0.584	0.646	3.83138644428874e-19
ENSG00000090316	MAEA	1.87384512778169e-23	-0.685083	0.187	0.31	4.0332642530373e-19
ENSG00000048162	NOP16	2.09522232644334e-23	-0.592475	0.138	0.261	4.50975653543664e-19
ENSG00000168374	ARF4	2.17816168900536e-23	-0.353332	0.654	0.709	4.68827521941513e-19
ENSG00000197019	SERTAD1	2.19928528217546e-23	-0.331974	0.631	0.708	4.73374164135446e-19
ENSG00000175390	EIF3F	2.2045275952512e-23	-0.482553	0.506	0.592	4.74502519601868e-19
ENSG00000055483	USP36	2.25788071216416e-23	-0.734768	0.096	0.204	4.85986244486215e-19
ENSG00000106635	BCL7B	2.50647796344912e-23	-0.575149	0.087	0.194	5.39494316852788e-19
ENSG00000213639	PPP1CB	2.58305531522075e-23	-0.588575	0.456	0.55	5.55976826048114e-19
ENSG00000065833	ME1	2.96250895556169e-23	-1.09851	0.137	0.242	6.37650427595098e-19
ENSG00000197822	OCLN	3.09501348306676e-23	-0.62681	0.25	0.374	6.6617070209529e-19
ENSG00000143384	MCL1	3.22888326896361e-23	-0.638703	0.38	0.493	6.94984834811728e-19
ENSG00000124795	DEK	3.27836502991855e-23	-0.511157	0.307	0.432	7.05635289039669e-19
ENSG00000182944	EWSR1	3.80074833591447e-23	-0.515693	0.323	0.454	8.18073071822231e-19
ENSG00000141098	GFOD2	4.18724848672629e-23	-0.857942	0.076	0.176	9.01263364282967e-19
ENSG00000137714	FDX1	4.40307446252619e-23	-0.484283	0.127	0.248	9.47717747314137e-19
ENSG00000180530	NRIP1	7.14690273135468e-23	-0.615743	0.181	0.304	1.53829934389678e-18
ENSG00000150457	LATS2	7.19411909291846e-23	-0.615116	0.163	0.289	1.54846219355977e-18
ENSG00000163624	CDS1	7.27220226674749e-23	-0.658421	0.11	0.223	1.56526881589473e-18
ENSG00000171453	POLR1C	7.54031750445953e-23	-0.808689	0.091	0.196	1.62297793965987e-18
ENSG00000149806	FAU	8.26514757005504e-23	-0.218209	0.907	0.906	1.77899036297865e-18
ENSG00000115446	UNC50	8.46730067448864e-23	-0.474973	0.081	0.185	1.82250179717694e-18
ENSG00000004961	HCCS	8.71636571960867e-23	-0.486487	0.155	0.278	1.87611055748857e-18
ENSG00000162734	PEA15	1.00816578504615e-22	-0.467784	0.413	0.529	2.16997603573334e-18
ENSG00000118007	STAG1	1.02069782588681e-22	-0.590976	0.097	0.207	2.19695000043876e-18
ENSG00000100226	GTPBP1	1.06074494036023e-22	-0.540977	0.27	0.396	2.28314740963135e-18
ENSG00000184990	SIVA1	1.08288161304456e-22	0.690721830659568	0.181	0.088	2.33079438391711e-18
ENSG00000111266	DUSP16	1.22205167022307e-22	-1.01744	0.095	0.199	2.63034401498813e-18
ENSG00000112773	TENT5A	1.23161920196321e-22	-0.827551	0.139	0.252	2.6509371703056e-18
ENSG00000002919	SNX11	1.29268001868658e-22	-0.697653	0.076	0.176	2.78236447222098e-18
ENSG00000112531	QKI	1.31621615608742e-22	-0.608494	0.295	0.425	2.83302365436257e-18
ENSG00000163166	IWS1	1.38854753198006e-22	-0.704316	0.122	0.235	2.98870970783388e-18
ENSG00000070831	CDC42	1.55009196172774e-22	-0.468039	0.478	0.556	3.33641793842278e-18
ENSG00000134757	DSG3	1.61821365701257e-22	0.761440029033938	0.21	0.112	3.48304307535385e-18
ENSG00000123268	ATF1	1.70823818677805e-22	-0.476268	0.136	0.255	3.67681187322107e-18
ENSG00000198833	UBE2J1	1.77204862844495e-22	-0.666328	0.139	0.257	3.81415746786492e-18
ENSG00000114902	SPCS1	1.77844001922378e-22	0.745229545628934	0.219	0.119	3.82791429737727e-18
ENSG00000138032	PPM1B	2.03549768677407e-22	-0.512813	0.089	0.195	4.38120522101252e-18
ENSG00000176046	NUPR1	2.05180937614591e-22	0.699562405590934	0.584	0.482	4.41631450121645e-18
ENSG00000132424	PNISR	2.1077896320056e-22	-0.51103	0.431	0.544	4.53680640392885e-18
NA	TROVE2	2.12714853167138e-22	-0.740061	0.083	0.184	4.57847449956947e-18
ENSG00000244754	N4BP2L2	2.13181867722398e-22	-0.368406	0.278	0.413	4.58852652085689e-18
ENSG00000161714	PLCD3	2.14941814720903e-22	-0.996156	0.081	0.177	4.62640762005272e-18
ENSG00000213859	KCTD11	2.15552100047385e-22	-0.886116	0.216	0.335	4.63954340141991e-18
ENSG00000006831	ADIPOR2	2.18496352275558e-22	-0.594196	0.209	0.333	4.70291548637911e-18
ENSG00000186591	UBE2H	2.30625433311288e-22	-0.524478	0.417	0.532	4.96398182659216e-18
ENSG00000100387	RBX1	2.48339172835014e-22	-0.401269	0.525	0.62	5.34525235610084e-18
ENSG00000176597	B3GNT5	2.68412282988387e-22	-0.798633	0.082	0.181	5.77730597904205e-18
ENSG00000135373	EHF	2.69899568310887e-22	-0.455613	0.484	0.57	5.80931830832353e-18
ENSG00000274213	AC015912.3	2.7398042601782e-22	-0.541331	0.299	0.419	5.89715468960756e-18
ENSG00000164032	H2AFZ	2.77351267158304e-22	-0.549909	0.738	0.778	5.96970867431534e-18
ENSG00000183624	HMCES	2.97962642771471e-22	-0.809389	0.073	0.171	6.41334792301314e-18
ENSG00000159256	MORC3	2.98747793912267e-22	-0.626004	0.156	0.274	6.43024751616763e-18
ENSG00000101146	RAE1	3.28020146439656e-22	-0.646344	0.13	0.245	7.06030563196717e-18
ENSG00000182149	IST1	3.3279543467261e-22	-0.414553	0.52	0.623	7.16308893589327e-18
ENSG00000161016	RPL8	3.61279027636307e-22	0.0645423243555077	0.875	0.847	7.77616979084387e-18
ENSG00000159069	FBXW5	3.79302073070523e-22	0.828537637211718	0.162	0.075	8.16409782076995e-18
ENSG00000278053	DDX52	3.80166088996096e-22	-0.551988	0.116	0.228	8.18269489955197e-18
ENSG00000107362	ABHD17B	4.01168846124452e-22	-1.12646	0.108	0.211	8.63475824398271e-18
ENSG00000197343	ZNF655	4.06050305152319e-22	-0.636725	0.174	0.295	8.73982676809852e-18
ENSG00000160570	DEDD2	4.06489148649609e-22	-0.466769	0.397	0.511	8.74927243553419e-18
ENSG00000196428	TSC22D2	4.49731538720552e-22	-0.582571	0.203	0.326	9.68002163942116e-18
ENSG00000114742	WDR48	4.8912702232118e-22	-0.966506	0.073	0.17	1.05279700284411e-17
ENSG00000111142	METAP2	5.59090605898408e-22	-0.478874	0.29	0.413	1.20338662013573e-17
ENSG00000007866	TEAD3	5.94529962396972e-22	-0.537476	0.143	0.255	1.27966629106324e-17
ENSG00000120616	EPC1	6.09872071813594e-22	-0.437608	0.258	0.384	1.31268864737158e-17
ENSG00000144366	GULP1	6.32474405089254e-22	-0.672051	0.147	0.264	1.36133790951411e-17
ENSG00000011243	AKAP8L	6.34291089808622e-22	-0.539113	0.107	0.214	1.36524814170408e-17
ENSG00000163681	SLMAP	6.65840175928409e-22	-0.524155	0.151	0.272	1.43315439466831e-17
ENSG00000175691	ZNF77	6.76248307582273e-22	-0.964966	0.066	0.158	1.45555685724008e-17
ENSG00000172216	CEBPB	6.76894004690399e-22	-0.695659	0.372	0.483	1.45694665569561e-17
ENSG00000170889	RPS9	6.82078393774801e-22	0.093940346672742	0.871	0.834	1.46810553476088e-17
ENSG00000107643	MAPK8	7.52819416433044e-22	-0.484612	0.323	0.446	1.62036851193048e-17
ENSG00000166579	NDEL1	7.59750014207481e-22	-0.592689	0.249	0.37	1.63528593058018e-17
ENSG00000088002	SULT2B1	8.92218483341699e-22	-0.469599	0.554	0.634	1.92041106354467e-17
ENSG00000137815	RTF1	9.17311856721831e-22	-0.423549	0.197	0.326	1.97442204040807e-17
ENSG00000131724	IL13RA1	9.51579049038758e-22	0.955863564870881	0.159	0.075	2.04817874515102e-17
ENSG00000100393	EP300	9.71290250304462e-22	-0.509353	0.26	0.39	2.09060513475532e-17
ENSG00000188994	ZNF292	9.77599972750269e-22	-0.9389	0.214	0.33	2.10418618134768e-17
ENSG00000100815	TRIP11	1.00119378509524e-21	-0.505052	0.116	0.225	2.154969503039e-17
ENSG00000143970	ASXL2	1.07598985412682e-21	-0.804554	0.083	0.184	2.31596056202256e-17
ENSG00000204435	CSNK2B	1.08932656139722e-21	-0.452899	0.398	0.504	2.34466649075138e-17
ENSG00000127948	POR	1.09882977333472e-21	-0.615384	0.265	0.388	2.36512120412565e-17
ENSG00000198888	MT-ND1	1.10970173307588e-21	0.108866065678023	0.91	0.842	2.38852201027253e-17
ENSG00000158315	RHBDL2	1.29498464529256e-21	-0.667156	0.191	0.306	2.78732495052771e-17
ENSG00000104497	SNX16	1.30474402145385e-21	-0.435051	0.217	0.339	2.80833103177726e-17
ENSG00000042493	CAPG	1.61131458126365e-21	0.555346080631394	0.174	0.085	3.46819350471188e-17
ENSG00000065613	SLK	1.70306706299718e-21	-0.532543	0.22	0.347	3.66568154639512e-17
ENSG00000117360	PRPF3	1.79158429761306e-21	-1.04234	0.078	0.172	3.85620604218236e-17
ENSG00000121749	TBC1D15	2.01576986784104e-21	-0.429813	0.473	0.562	4.33874306354106e-17
ENSG00000008952	SEC62	2.02099067613015e-21	-0.403828	0.381	0.5	4.34998033130253e-17
ENSG00000153914	SREK1	2.0572103255726e-21	-0.733743	0.131	0.243	4.42793950476246e-17
ENSG00000159200	RCAN1	2.22199204457403e-21	-1.06455	0.134	0.238	4.78261567674115e-17
ENSG00000105701	FKBP8	2.34250430423078e-21	0.656948156299202	0.313	0.203	5.04200626442634e-17
ENSG00000034677	RNF19A	2.38855997196706e-21	-1.03562	0.069	0.162	5.14113648366189e-17
ENSG00000156802	ATAD2	2.81433209668105e-21	-0.601451	0.107	0.213	6.05756840489629e-17
ENSG00000171444	MCC	2.91883466006269e-21	-1.19335	0.064	0.153	6.28249972231894e-17
ENSG00000177463	NR2C2	3.67172369028992e-21	-0.640255	0.136	0.248	7.90301807098003e-17
ENSG00000077147	TM9SF3	3.67999042507281e-21	-0.626276	0.202	0.321	7.92081139092672e-17
ENSG00000134056	MRPS36	3.70961933963802e-21	-0.499024	0.161	0.277	7.98458466663688e-17
ENSG00000164117	FBXO8	4.18994096842501e-21	-0.749924	0.062	0.152	9.01842894043799e-17
ENSG00000039123	MTREX	4.53757631163249e-21	-0.529785	0.095	0.197	9.76667925315777e-17
ENSG00000118454	ANKRD13C	4.74042273514409e-21	-0.609391	0.108	0.213	1.02032858951241e-16
ENSG00000130203	APOE	4.75944715854678e-21	0.383399268781401	0.209	0.109	1.02442340640561e-16
ENSG00000110651	CD81	5.44492929727552e-21	0.85826003290833	0.285	0.184	1.17196658194558e-16
ENSG00000100461	RBM23	5.44668617743742e-21	-0.60085	0.084	0.181	1.17234473283163e-16
ENSG00000269028	MTRNR2L12	5.49769683879374e-21	0.842693814672224	0.945	0.963	1.18332426758196e-16
ENSG00000113282	CLINT1	5.56397231174686e-21	-0.75635	0.086	0.184	1.19758940038039e-16
ENSG00000064225	ST3GAL6	5.72516987883108e-21	-0.887363	0.123	0.225	1.2322855647196e-16
ENSG00000002586	CD99	5.76255350302826e-21	0.182623799561174	0.18	0.087	1.2403320159918e-16
ENSG00000144048	DUSP11	6.01606905488477e-21	-0.668536	0.098	0.199	1.2948987033734e-16
ENSG00000156671	SAMD8	6.04198372147479e-21	-0.554625	0.153	0.265	1.30047657621023e-16
ENSG00000129351	ILF3	6.26875395467285e-21	-0.411433	0.224	0.356	1.34928660120378e-16
ENSG00000107521	HPS1	6.40848821234345e-21	-0.420795	0.189	0.311	1.37936300282481e-16
ENSG00000102901	CENPT	6.59449973518457e-21	-0.658828	0.151	0.262	1.41940012300113e-16
ENSG00000165006	UBAP1	6.67890854994114e-21	-0.378653	0.402	0.506	1.43756827628933e-16
ENSG00000145632	PLK2	6.7188360009161e-21	-0.490199	0.386	0.502	1.44616226083718e-16
ENSG00000136810	TXN	6.74396011317086e-21	0.145447228409212	0.732	0.661	1.4515699747589e-16
ENSG00000236740	AL033384.1	7.02767692372123e-21	1.14424787881198	0.169	0.084	1.51263718106176e-16
ENSG00000178607	ERN1	7.46759692944678e-21	-0.686986	0.11	0.212	1.60732556309413e-16
ENSG00000136152	COG3	7.74293951360937e-21	-0.635118	0.1	0.203	1.66659030090928e-16
ENSG00000110713	NUP98	7.84751679717322e-21	-0.541204	0.131	0.243	1.68909951542356e-16
ENSG00000163877	SNIP1	7.92443060481445e-21	-0.499571	0.229	0.354	1.70565444338026e-16
ENSG00000099797	TECR	8.01480324244589e-21	0.697744139984806	0.335	0.235	1.72510624990405e-16
ENSG00000062716	VMP1	8.08619293336993e-21	0.600652550093684	0.505	0.423	1.74047216697854e-16
ENSG00000231389	HLA-DPA1	8.19384201657116e-21	0.534622305741595	0.288	0.177	1.76364255564678e-16
ENSG00000173083	HPSE	8.53407776591324e-21	-0.586272	0.224	0.339	1.83687489833517e-16
ENSG00000072401	UBE2D1	8.64409016301334e-21	-0.558708	0.419	0.527	1.86055396668699e-16
ENSG00000100462	PRMT5	8.80372620692666e-21	-0.596807	0.104	0.208	1.89491402877889e-16
ENSG00000185950	IRS2	9.25758366691046e-21	-0.441931	0.418	0.536	1.99260230846581e-16
ENSG00000169682	SPNS1	1.0270797449476e-20	-0.443715	0.258	0.383	2.21068644302521e-16
ENSG00000163141	BNIPL	1.15981616946809e-20	-0.592519	0.181	0.294	2.49638832316312e-16
ENSG00000171222	SCAND1	1.16020677408296e-20	0.763814581605286	0.278	0.174	2.49722906053616e-16
ENSG00000165629	ATP5F1C	1.18816481999364e-20	0.805423973643325	0.153	0.071	2.55740595855431e-16
ENSG00000169100	SLC25A6	1.32629981305169e-20	0.528174470228916	0.489	0.382	2.85472771761246e-16
ENSG00000112237	CCNC	1.40410321322978e-20	-0.560241	0.292	0.406	3.02219175615577e-16
ENSG00000159352	PSMD4	1.44325913575846e-20	-0.487715	0.178	0.297	3.10647096380651e-16
ENSG00000136688	IL36G	1.48420095014031e-20	0.610859142778172	0.421	0.311	3.194594125082e-16
ENSG00000173692	PSMD1	1.48441731015615e-20	-0.695832	0.111	0.214	3.1950598183801e-16
ENSG00000119953	SMNDC1	1.5700038692736e-20	-0.527567	0.263	0.381	3.3792763282245e-16
ENSG00000138081	FBXO11	1.57410510363302e-20	-0.626715	0.166	0.282	3.38810382505972e-16
ENSG00000000457	SCYL3	1.62866146746703e-20	-0.645645	0.165	0.275	3.50553094257603e-16
ENSG00000096063	SRPK1	1.78801957010005e-20	-0.826013	0.087	0.183	3.84853332268335e-16
ENSG00000100284	TOM1	1.8202249913226e-20	-0.413758	0.288	0.41	3.91785227132277e-16
ENSG00000148926	ADM	1.82179526011151e-20	-1.18167	0.279	0.397	3.92123211786402e-16
ENSG00000119318	RAD23B	1.983568113526e-20	-0.440475	0.152	0.265	4.26943200755337e-16
ENSG00000176978	DPP7	2.08997479732004e-20	0.530361954021625	0.17	0.084	4.49846175375165e-16
ENSG00000116754	SRSF11	2.10725640328108e-20	-0.499392	0.338	0.459	4.5356586824222e-16
NA	SEPT7	2.12104157520217e-20	-0.477852	0.27	0.384	4.56532988646515e-16
ENSG00000170423	KRT78	2.12915887327883e-20	-0.755372	0.228	0.338	4.58280155884536e-16
ENSG00000168439	STIP1	2.14223102016219e-20	-0.407746	0.251	0.38	4.6109380477971e-16
ENSG00000185591	SP1	2.20848244380885e-20	-0.699128	0.09	0.189	4.75353761205416e-16
ENSG00000070190	DAPP1	2.31216759524949e-20	-0.663277	0.455	0.533	4.976709532015e-16
ENSG00000090432	MUL1	2.34991246189155e-20	-0.648331	0.134	0.241	5.05795158297538e-16
ENSG00000187051	RPS19BP1	2.5536118208693e-20	0.47349367969531	0.234	0.136	5.49639408323908e-16
ENSG00000131037	EPS8L1	2.59427115158782e-20	-0.54754	0.5	0.595	5.58390922667762e-16
ENSG00000147872	PLIN2	2.60388673048757e-20	0.593100278634801	0.264	0.159	5.60460579870144e-16
ENSG00000175893	ZDHHC21	2.67974053973482e-20	1.15248994468447	0.155	0.075	5.76787353772524e-16
ENSG00000198087	CD2AP	2.77513608632517e-20	-0.776089	0.113	0.215	5.97320291220628e-16
ENSG00000250988	SNHG21	2.78906807411674e-20	-0.87624	0.065	0.151	6.00319012272886e-16
ENSG00000144848	ATG3	2.85756976162622e-20	-0.475836	0.212	0.335	6.15063315492429e-16
ENSG00000100109	TFIP11	2.8955967227093e-20	-0.609729	0.114	0.219	6.2324823859595e-16
ENSG00000127249	ATP13A4	3.03328322174067e-20	-0.946665	0.078	0.168	6.52883880647462e-16
ENSG00000138674	SEC31A	3.09787611230049e-20	-0.420905	0.13	0.24	6.66786854411558e-16
ENSG00000129562	DAD1	3.14324877547043e-20	0.476366260819652	0.458	0.362	6.76552866432256e-16
ENSG00000169251	NMD3	3.61831121456335e-20	-0.481528	0.064	0.152	7.78805305822615e-16
ENSG00000085733	CTTN	3.8532137855043e-20	-0.438385	0.278	0.394	8.29365735191946e-16
ENSG00000198712	MT-CO2	4.16125733966289e-20	-0.0151528	0.946	0.909	8.9566902978904e-16
ENSG00000155975	VPS37A	4.17846805782303e-20	-0.813634	0.092	0.188	8.9937346476583e-16
ENSG00000092020	PPP2R3C	4.37153756281297e-20	-0.645129	0.109	0.212	9.40929745019864e-16
ENSG00000196998	WDR45	5.04686825632199e-20	-0.474793	0.464	0.547	1.08628792349075e-15
ENSG00000162069	BICDL2	5.07741325444685e-20	0.894307423041677	0.238	0.144	1.09286242888714e-15
ENSG00000156299	TIAM1	5.19031868183729e-20	-0.5771	0.105	0.208	1.11716419307866e-15
ENSG00000160633	SAFB	5.34927865322744e-20	-0.444693	0.235	0.36	1.15137873732067e-15
ENSG00000136527	TRA2B	5.45470423947669e-20	-0.338527	0.545	0.619	1.17407054050496e-15
ENSG00000151247	EIF4E	5.45642322051269e-20	-0.433239	0.449	0.533	1.17444053398315e-15
ENSG00000133318	RTN3	5.64323098899e-20	-0.58064	0.191	0.309	1.21464903807021e-15
ENSG00000154227	CERS3	5.82463177210482e-20	-0.559148	0.296	0.406	1.25369374262784e-15
ENSG00000270629	NBPF14	6.11453904215939e-20	-0.48347	0.151	0.264	1.31609338343439e-15
ENSG00000113648	H2AFY	6.66186563621668e-20	-0.496573	0.311	0.426	1.43389995953928e-15
ENSG00000121579	NAA50	6.90752308554869e-20	-0.416936	0.197	0.32	1.4867752689335e-15
ENSG00000197579	TOPORS	7.12120011790139e-20	-0.609205	0.106	0.208	1.5327671133771e-15
ENSG00000011304	PTBP1	7.44066697743698e-20	-0.520204	0.302	0.41	1.60152916022354e-15
ENSG00000136826	KLF4	8.18930276606941e-20	-0.522342	0.413	0.514	1.76266552736878e-15
ENSG00000085274	MYNN	8.61307345136407e-20	-0.52977	0.106	0.206	1.8538779296716e-15
ENSG00000143622	RIT1	8.62380399121906e-20	-0.674614	0.232	0.344	1.85618757106999e-15
ENSG00000156273	BACH1	8.69716813766091e-20	-0.68237	0.181	0.292	1.87197846995014e-15
ENSG00000113732	ATP6V0E1	8.79765640525092e-20	-0.269195	0.665	0.722	1.89360756466621e-15
ENSG00000148943	LIN7C	8.82843083168947e-20	-0.494919	0.105	0.208	1.90023145221284e-15
ENSG00000258102	MAP1LC3B2	9.42945674504688e-20	-0.463801	0.141	0.25	2.02959626980389e-15
ENSG00000184900	SUMO3	9.44120363655778e-20	0.663773857758195	0.198	0.108	2.0321246707327e-15
ENSG00000110047	EHD1	9.76273075085201e-20	-0.666776	0.243	0.355	2.10133016681339e-15
ENSG00000084623	EIF3I	1.16620699155974e-19	-0.434916	0.371	0.474	2.51014392863319e-15
ENSG00000169583	CLIC3	1.24571238661968e-19	0.736022599982941	0.15	0.07	2.6812713409602e-15
ENSG00000162923	WDR26	1.33214915391818e-19	-0.403374	0.355	0.474	2.86731783889348e-15
ENSG00000129559	NEDD8	1.35435140417855e-19	0.402789344624769	0.431	0.32	2.91510596235392e-15
ENSG00000104343	UBE2W	1.46504054465774e-19	-0.452097	0.112	0.213	3.15335326832132e-15
ENSG00000175224	ATG13	1.50702370333483e-19	-0.608056	0.174	0.283	3.24371781905789e-15
ENSG00000106546	AHR	1.61272988198528e-19	-0.669176	0.094	0.193	3.47123979798512e-15
ENSG00000166136	NDUFB8	1.92354846225352e-19	0.607349350301401	0.288	0.186	4.14024571015448e-15
ENSG00000070610	GBA2	2.24437433003141e-19	-0.993798	0.187	0.29	4.8307913079596e-15
ENSG00000007392	LUC7L	2.33421971734132e-19	-0.598712	0.112	0.212	5.02417451960545e-15
ENSG00000178127	NDUFV2	2.38617134978473e-19	0.444809052134014	0.187	0.097	5.13599521327664e-15
ENSG00000130449	ZSWIM6	2.509553857354e-19	-1.00011	0.087	0.179	5.40156372256876e-15
ENSG00000248333	CDK11B	2.66184041367184e-19	-0.638635	0.14	0.248	5.72934530638726e-15
ENSG00000165795	NDRG2	2.72177684901431e-19	-0.352154	0.636	0.714	5.8583524898184e-15
ENSG00000119321	FKBP15	2.84453568571463e-19	-0.514445	0.268	0.384	6.12257860993217e-15
ENSG00000220205	VAMP2	3.13029395911364e-19	-0.379425	0.379	0.497	6.7376447175962e-15
ENSG00000116473	RAP1A	3.14752444551604e-19	-0.403647	0.207	0.326	6.77473161652874e-15
ENSG00000204287	HLA-DRA	3.25513806611079e-19	0.260246945354891	0.544	0.429	7.00635917349687e-15
ENSG00000206527	HACD2	3.38164375884171e-19	-0.681967	0.067	0.154	7.2786500265309e-15
ENSG00000151693	ASAP2	3.38993698643148e-19	-0.946756	0.084	0.173	7.29650036959512e-15
ENSG00000170185	USP38	3.93517363937656e-19	-0.493262	0.327	0.444	8.47006774139412e-15
ENSG00000132334	PTPRE	4.01115191824056e-19	-0.723947	0.129	0.229	8.63360338882099e-15
ENSG00000099942	CRKL	4.36489470057668e-19	-0.582369	0.218	0.329	9.39499935352125e-15
ENSG00000234545	FAM133B	4.37725270653765e-19	-0.647783	0.145	0.252	9.42159872555165e-15
ENSG00000078618	NRDC	4.3918594369474e-19	-0.688257	0.128	0.227	9.45303825208558e-15
ENSG00000198625	MDM4	4.89922033353323e-19	-0.479724	0.152	0.264	1.05450818458969e-14
ENSG00000136943	CTSV	5.0702092502561e-19	-0.648788	0.409	0.522	1.09131183902512e-14
ENSG00000176915	ANKLE2	5.32903672418399e-19	-0.748146	0.167	0.274	1.14702186451336e-14
ENSG00000147883	CDKN2B	5.85477175516746e-19	-1.10987	0.091	0.18	1.26018107258225e-14
ENSG00000143947	RPS27A	5.86166618104131e-19	0.0939491176803431	0.916	0.885	1.26166502880733e-14
ENSG00000159840	ZYX	6.09059230313819e-19	0.765045973027308	0.19	0.105	1.31093908732746e-14
ENSG00000154001	PPP2R5E	6.42589615953901e-19	-0.717903	0.077	0.166	1.38310988937918e-14
ENSG00000163453	IGFBP7	6.63292479815858e-19	-0.260906	0.173	0.084	1.42767073355565e-14
ENSG00000133065	SLC41A1	6.7074875615465e-19	-0.515952	0.16	0.27	1.44371962274727e-14
ENSG00000086712	TXLNG	6.87839266044538e-19	-0.547149	0.096	0.192	1.48050523623426e-14
ENSG00000241479	AC074033.1	7.12295144379498e-19	-0.652204	0.183	0.292	1.53314406876243e-14
ENSG00000096384	HSP90AB1	7.83740201102056e-19	-0.192131	0.762	0.812	1.68692240885206e-14
ENSG00000173113	TRMT112	8.42733088415664e-19	0.381600581810676	0.395	0.284	1.81389869950588e-14
ENSG00000153006	SREK1IP1	8.4682817454606e-19	-0.34855	0.597	0.675	1.82271296289294e-14
ENSG00000114473	IQCG	9.90062279510529e-19	-1.31984	0.114	0.208	2.13101005041846e-14
ENSG00000120306	CYSTM1	1.01015314442736e-18	0.585686544099262	0.167	0.085	2.17425362806545e-14
ENSG00000198815	FOXJ3	1.07588530896386e-18	-0.685378	0.137	0.237	2.31573553901382e-14
ENSG00000163714	U2SURP	1.09837265168448e-18	-0.488553	0.139	0.246	2.36413729548568e-14
ENSG00000011198	ABHD5	1.13916077915085e-18	-0.324867	0.549	0.634	2.45192966104428e-14
NA	MUT	1.17786982752386e-18	-0.707814	0.094	0.186	2.53524701676236e-14
ENSG00000198818	SFT2D1	1.1872899568521e-18	0.75757386823554	0.298	0.2	2.55552290312847e-14
ENSG00000073969	NSF	1.20092705023694e-18	-0.73534	0.075	0.162	2.58487538292999e-14
ENSG00000137693	YAP1	1.28847939179894e-18	-0.576416	0.202	0.316	2.77332304290805e-14
ENSG00000130818	ZNF426	1.34294102309642e-18	-0.566854	0.299	0.41	2.89054625811273e-14
ENSG00000146592	CREB5	1.36825892530711e-18	-0.827705	0.082	0.169	2.94504051083103e-14
ENSG00000273841	TAF9	1.40799555028643e-18	-0.483485	0.131	0.236	3.03056962243651e-14
ENSG00000136450	SRSF1	1.42276930008878e-18	-0.478247	0.145	0.254	3.0623686415111e-14
ENSG00000196182	STK40	1.45276733375572e-18	-0.40899	0.235	0.346	3.1269364091758e-14
ENSG00000139163	ETNK1	1.50616300604069e-18	-0.479833	0.318	0.431	3.24186525420199e-14
ENSG00000112305	SMAP1	1.53105287531113e-18	-0.51854	0.168	0.274	3.29543820881968e-14
ENSG00000164163	ABCE1	1.63376567386528e-18	-0.604861	0.069	0.154	3.51651723642762e-14
ENSG00000153339	TRAPPC8	1.63910943619949e-18	-0.601394	0.176	0.287	3.52801915047577e-14
ENSG00000133794	ARNTL	1.8058845809149e-18	-0.431178	0.143	0.248	3.88698597196123e-14
ENSG00000113387	SUB1	1.90841860083576e-18	-0.269908	0.671	0.713	4.10768019643889e-14
ENSG00000155366	RHOC	1.93442822171147e-18	0.327707633549461	0.386	0.273	4.16366330441177e-14
ENSG00000230989	HSBP1	1.9703623224329e-18	0.493421756991091	0.316	0.211	4.24100786280457e-14
ENSG00000170027	YWHAG	2.00687725601126e-18	-0.475442	0.272	0.388	4.31960260583863e-14
ENSG00000176853	FAM91A1	2.00918645607443e-18	-0.433146	0.234	0.346	4.32457292805459e-14
ENSG00000134250	NOTCH2	2.12689401200602e-18	-0.603253	0.114	0.21	4.57792667144176e-14
ENSG00000133393	FOPNL	2.22902225563381e-18	-0.598019	0.084	0.174	4.79774750302622e-14
ENSG00000166167	BTRC	2.37659718620959e-18	-0.758143	0.142	0.24	5.11538778359752e-14
ENSG00000214756	CSKMT	2.46915492769202e-18	0.177829826520746	0.251	0.145	5.31460906636431e-14
ENSG00000106829	TLE4	2.52997964899061e-18	-0.598651	0.171	0.281	5.44552819648739e-14
ENSG00000251562	MALAT1	2.55147449137993e-18	0.329015943592388	0.996	0.997	5.49179369524615e-14
ENSG00000186566	GPATCH8	2.58115253406054e-18	-0.341966	0.144	0.252	5.55567271431191e-14
ENSG00000136273	HUS1	2.77167147994275e-18	-0.67376	0.099	0.19	5.96574569342878e-14
ENSG00000266412	NCOA4	2.78094259680403e-18	-0.361335	0.21	0.324	5.985700845361e-14
ENSG00000172819	RARG	3.26286481297692e-18	-0.766668	0.084	0.171	7.02299022345152e-14
ENSG00000156860	FBRS	3.29674427020713e-18	-0.520956	0.252	0.367	7.09591236719383e-14
ENSG00000160888	IER2	3.55846220234814e-18	-0.489368	0.732	0.763	7.65923404433413e-14
ENSG00000188243	COMMD6	3.72238714553024e-18	0.328755485859812	0.364	0.248	8.01206609203928e-14
ENSG00000172201	ID4	3.76085028312776e-18	-0.563239	0.183	0.292	8.0948541494042e-14
ENSG00000151657	KIN	3.9267564685292e-18	-0.569031	0.102	0.195	8.45195062286226e-14
ENSG00000154813	DPH3	4.01191950855289e-18	-0.531853	0.249	0.36	8.63525555020925e-14
ENSG00000115738	ID2	4.12877217376802e-18	0.251629864884273	0.765	0.657	8.88676922681828e-14
ENSG00000164023	SGMS2	4.12938882416305e-18	-0.828162	0.203	0.303	8.88809650512855e-14
ENSG00000178078	STAP2	4.3521409780025e-18	-0.437858	0.313	0.415	9.36754824105257e-14
ENSG00000084733	RAB10	4.40314508130949e-18	-0.509216	0.404	0.496	9.47732947301055e-14
ENSG00000204673	AKT1S1	4.64588192396378e-18	-0.348731	0.417	0.52	9.99979625313964e-14
ENSG00000058272	PPP1R12A	4.71344204028328e-18	-0.467672	0.114	0.213	1.01452126475057e-13
ENSG00000125633	CCDC93	4.73602597704891e-18	-0.758008	0.07	0.153	1.01938223130001e-13
ENSG00000164687	FABP5	4.92595558978887e-18	0.864203080776377	0.503	0.384	1.06026268114616e-13
ENSG00000180667	YOD1	5.3842871502026e-18	-0.466391	0.322	0.44	1.15891396620961e-13
ENSG00000140497	SCAMP2	5.38656025278647e-18	0.882905067349768	0.175	0.095	1.15940322880976e-13
ENSG00000123066	MED13L	5.7650591381774e-18	-0.668335	0.218	0.329	1.2408713289013e-13
ENSG00000101266	CSNK2A1	6.26574160383277e-18	-0.532776	0.139	0.241	1.34863822280897e-13
ENSG00000161970	RPL26	6.45694717921817e-18	0.220475287129732	0.866	0.837	1.38979331085492e-13
ENSG00000107104	KANK1	6.63659458414944e-18	-1.07165	0.092	0.178	1.42846061829232e-13
ENSG00000197345	MRPL21	6.65134152284383e-18	-0.302384	0.114	0.212	1.43163474937691e-13
ENSG00000172183	ISG20	7.65933535692946e-18	-0.514197	0.465	0.547	1.6485953422255e-13
ENSG00000185896	LAMP1	7.66907082017666e-18	-0.420175	0.429	0.535	1.65069080333482e-13
ENSG00000105327	BBC3	7.70373260483987e-18	-0.671435	0.169	0.277	1.65815140586573e-13
ENSG00000159140	SON	8.08555820319371e-18	-0.309606	0.57	0.64	1.74033554765541e-13
ENSG00000117139	KDM5B	8.14772173040516e-18	-0.483831	0.192	0.305	1.75371562525241e-13
ENSG00000130935	NOL11	8.51183029957028e-18	-0.339263	0.07	0.154	1.83208635367951e-13
ENSG00000196586	MYO6	9.03382199183541e-18	-0.410633	0.499	0.578	1.94443984552265e-13
ENSG00000127954	STEAP4	9.04119809336422e-18	-0.661337	0.201	0.306	1.94602747761571e-13
ENSG00000101310	SEC23B	9.29688224071652e-18	-0.392476	0.125	0.223	2.00106093349182e-13
ENSG00000203780	FANK1	9.93510888756843e-18	-0.501153	0.122	0.219	2.13843283696023e-13
ENSG00000132676	DAP3	1.04970930331474e-17	-0.395479	0.147	0.252	2.25939430445464e-13
ENSG00000163814	CDCP1	1.05668522750883e-17	0.705325262415272	0.17	0.091	2.27440928369001e-13
ENSG00000104872	PIH1D1	1.0818019148866e-17	0.636722710744055	0.246	0.155	2.32847044160192e-13
ENSG00000172530	BANP	1.1045400624385e-17	-0.42117	0.12	0.219	2.37741203039264e-13
ENSG00000145687	SSBP2	1.14431107903637e-17	-0.820328	0.069	0.152	2.46301516651789e-13
ENSG00000151929	BAG3	1.24476249726219e-17	-0.522333	0.309	0.421	2.67922679910713e-13
ENSG00000009307	CSDE1	1.26688241088341e-17	-0.407762	0.379	0.486	2.72683770118546e-13
ENSG00000172818	OVOL1	1.30005765581393e-17	-0.790593	0.215	0.315	2.7982440983739e-13
ENSG00000004059	ARF5	1.37600416074513e-17	-0.251648	0.173	0.278	2.96171135558782e-13
ENSG00000167522	ANKRD11	1.40097395713084e-17	-0.434417	0.154	0.262	3.01545634532841e-13
ENSG00000134313	KIDINS220	1.49488932904682e-17	-0.514688	0.123	0.224	3.21759979184037e-13
ENSG00000089876	DHX32	1.57739449737055e-17	-0.725846	0.12	0.213	3.39518391614037e-13
ENSG00000117395	EBNA1BP2	1.58609504888545e-17	-0.539368	0.105	0.197	3.41391098322104e-13
ENSG00000149923	PPP4C	1.59341751066998e-17	-0.434386	0.478	0.555	3.42967184996606e-13
ENSG00000136718	IMP4	1.63415888665662e-17	-0.549974	0.08	0.165	3.51736358763971e-13
ENSG00000198576	ARC	1.85232413643799e-17	-0.748951	0.191	0.294	3.98694247126914e-13
ENSG00000174780	SRP72	1.87963740167262e-17	-0.466768	0.206	0.314	4.04573154336016e-13
ENSG00000166592	RRAD	2.0063391877726e-17	-0.975046	0.149	0.249	4.31844446776174e-13
ENSG00000189114	BLOC1S3	2.14627279817633e-17	-0.402472	0.072	0.157	4.61963757079474e-13
ENSG00000100764	PSMC1	2.26109340845919e-17	-0.43685	0.311	0.413	4.86677745236756e-13
ENSG00000255529	POLR2M	2.26945080665953e-17	-0.60944	0.106	0.197	4.88476591625396e-13
ENSG00000163904	SENP2	2.32006255445709e-17	-0.75665	0.07	0.151	4.99370264221344e-13
ENSG00000120129	DUSP1	2.42099145069554e-17	-0.597416	0.252	0.358	5.21094199847707e-13
ENSG00000134954	ETS1	2.68957978387517e-17	-0.696618	0.216	0.318	5.78905152681291e-13
ENSG00000127993	RBM48	2.75543746313106e-17	-0.452612	0.211	0.322	5.9308035956433e-13
ENSG00000092201	SUPT16H	2.82641444004523e-17	-0.398282	0.091	0.182	6.08357444075335e-13
ENSG00000198853	RUSC2	2.83413681361838e-17	-1.16459	0.097	0.181	6.1001960776322e-13
ENSG00000087087	SRRT	2.92513045419013e-17	-0.409465	0.086	0.176	6.29605078959885e-13
ENSG00000151353	TMEM18	2.98567880894352e-17	-0.477397	0.106	0.197	6.42637506837003e-13
ENSG00000135750	KCNK1	3.01760645656428e-17	-0.689112	0.224	0.33	6.49509613710896e-13
ENSG00000169714	CNBP	3.16020329046478e-17	-0.307622	0.409	0.524	6.8020215623964e-13
ENSG00000060688	SNRNP40	3.6635792421051e-17	-0.721394	0.094	0.183	7.88548796070701e-13
ENSG00000023445	BIRC3	3.81316480923037e-17	0.357339156974462	0.295	0.191	8.20745593538746e-13
ENSG00000172175	MALT1	3.8816960754788e-17	-0.2338	0.108	0.204	8.35496263286056e-13
ENSG00000118900	UBN1	3.9591343536949e-17	-0.37724	0.181	0.294	8.5216407828929e-13
ENSG00000100330	MTMR3	4.08038530610211e-17	-0.527152	0.194	0.302	8.78262133285417e-13
ENSG00000117595	IRF6	4.1006615748842e-17	-0.784103	0.232	0.328	8.82626397378076e-13
ENSG00000080815	PSEN1	4.28733703717047e-17	-0.493216	0.17	0.27	9.22806423880572e-13
ENSG00000115295	CLIP4	4.33323122442569e-17	-0.509008	0.094	0.184	9.32684688745386e-13
ENSG00000198060	2026-03-05	4.4283627139731e-17	-0.396628	0.383	0.481	9.5316079055557e-13
ENSG00000078902	TOLLIP	4.82344463464452e-17	-0.397867	0.274	0.387	1.03819822316089e-12
NA	PQLC1	5.34060137720165e-17	-0.581556	0.173	0.273	1.14951104042888e-12
ENSG00000168275	COA6	5.49365325134245e-17	-0.696044	0.099	0.188	1.18245392581895e-12
ENSG00000124688	MAD2L1BP	5.57060181600312e-17	-0.708178	0.089	0.175	1.19901633487651e-12
ENSG00000060558	GNA15	6.77681861939618e-17	-0.607021	0.206	0.308	1.45864243963883e-12
ENSG00000269893	SNHG8	6.83458119436051e-17	-0.914585	0.365	0.456	1.47107525627416e-12
ENSG00000182795	C1orf116	6.83848905190584e-17	-0.564843	0.186	0.287	1.47191638353221e-12
ENSG00000075223	SEMA3C	7.48435761207611e-17	-0.694477	0.228	0.329	1.61093313242326e-12
ENSG00000170242	USP47	8.19777171341592e-17	-0.701073	0.146	0.247	1.76448838359564e-12
ENSG00000115053	NCL	8.29672668276567e-17	-0.421669	0.314	0.424	1.78578745119848e-12
ENSG00000116350	SRSF4	8.30874482311103e-17	-0.416393	0.176	0.287	1.78837423572642e-12
ENSG00000111237	VPS29	8.49858469032161e-17	-0.357625	0.239	0.35	1.82923536874482e-12
ENSG00000176994	SMCR8	8.64017799545829e-17	-0.508932	0.121	0.217	1.85971191174244e-12
ENSG00000221926	TRIM16	8.79046105114699e-17	-0.865505	0.106	0.192	1.89205883664888e-12
ENSG00000124193	SRSF6	9.00174782246582e-17	-0.494628	0.401	0.489	1.93753620130754e-12
ENSG00000061936	SFSWAP	9.48095639609885e-17	-0.656196	0.129	0.225	2.04068105469632e-12
ENSG00000104805	NUCB1	1.00367675474042e-16	0.508972708781243	0.207	0.124	2.16031384690328e-12
ENSG00000114850	SSR3	1.09582001608933e-16	-0.594103	0.201	0.307	2.35864300263068e-12
ENSG00000141030	COPS3	1.10975654714432e-16	-0.413163	0.139	0.238	2.38863999207342e-12
ENSG00000128578	STRIP2	1.11487847998929e-16	-0.745069	0.103	0.19	2.39966444032896e-12
ENSG00000110958	PTGES3	1.14325580785212e-16	-0.422689	0.28	0.387	2.46074380082089e-12
ENSG00000244045	TMEM199	1.18077732129451e-16	-0.433913	0.086	0.171	2.54150510635429e-12
ENSG00000069399	BCL3	1.20057859794053e-16	-0.851993	0.072	0.15	2.5841253742072e-12
ENSG00000204370	SDHD	1.27877277640855e-16	-0.411482	0.197	0.307	2.75243052394177e-12
ENSG00000162517	PEF1	1.29218167316855e-16	-0.411037	0.085	0.171	2.78129183332799e-12
ENSG00000116898	MRPS15	1.29879768025819e-16	-0.441839	0.155	0.254	2.79553212698774e-12
ENSG00000133112	TPT1	1.30039920260114e-16	0.289823436040358	0.994	0.993	2.7989792436787e-12
ENSG00000254584	AL035078.1	1.36638728335312e-16	1.08379110121118	0.191	0.109	2.94101198868925e-12
ENSG00000188486	H2AFX	1.4196973297943e-16	-0.523258	0.352	0.455	3.05575653264926e-12
ENSG00000134755	DSC2	1.43097393165522e-16	0.293822411876039	0.456	0.352	3.08002829049469e-12
ENSG00000105698	USF2	1.44176678868693e-16	0.690704305317578	0.158	0.084	3.10325883596974e-12
ENSG00000104881	PPP1R13L	1.57028674047711e-16	-0.33353	0.203	0.313	3.37988518020293e-12
ENSG00000087266	SH3BP2	1.57655956780603e-16	-0.791141	0.08	0.162	3.39338681374569e-12
ENSG00000167110	GOLGA2	1.58344519769907e-16	-0.668956	0.169	0.268	3.40820744352748e-12
ENSG00000204138	PHACTR4	1.61132949383846e-16	-0.386752	0.487	0.569	3.46822560253791e-12
ENSG00000067334	DNTTIP2	1.67357479671181e-16	-0.890501	0.075	0.155	3.60220239244251e-12
ENSG00000131732	ZCCHC9	1.6831710000815e-16	-0.500326	0.173	0.275	3.62285726057543e-12
ENSG00000185658	BRWD1	1.6993879547559e-16	-0.484018	0.145	0.242	3.6577626338166e-12
ENSG00000100554	ATP6V1D	1.73617147711425e-16	-0.38028	0.444	0.524	3.73693548734072e-12
ENSG00000124767	GLO1	1.80239671207228e-16	-0.581712	0.388	0.474	3.87947868306437e-12
ENSG00000108055	SMC3	1.80270797904658e-16	-0.379419	0.109	0.203	3.88014865409985e-12
ENSG00000072803	FBXW11	1.81747080987527e-16	-0.65507	0.153	0.248	3.91192417117554e-12
ENSG00000167182	SP2	2.08319546365169e-16	-0.601195	0.104	0.193	4.4838699159639e-12
ENSG00000213626	LBH	2.32380758640875e-16	0.285330759772287	0.197	0.112	5.00176344898618e-12
ENSG00000115590	IL1R2	2.60384109694061e-16	-0.435154	0.279	0.386	5.60450757705496e-12
ENSG00000276900	AC023157.3	2.7388737764202e-16	0.322217761990735	0.391	0.287	5.89515191636683e-12
ENSG00000242802	AP5Z1	2.76271503123432e-16	-0.404147	0.225	0.336	5.94646783322875e-12
ENSG00000075391	RASAL2	2.78070778537172e-16	-0.382912	0.162	0.267	5.98519543723409e-12
ENSG00000101608	MYL12A	2.81863730146583e-16	0.360822480616967	0.728	0.656	6.06683492767505e-12
ENSG00000167088	SNRPD1	2.91051744914858e-16	0.213846573072787	0.155	0.079	6.26459775754741e-12
ENSG00000072609	CHFR	3.06765617969443e-16	-0.556912	0.076	0.157	6.60282316117429e-12
ENSG00000105248	YJU2	3.09776542243107e-16	-0.582297	0.08	0.162	6.66763029524064e-12
ENSG00000142168	SOD1	3.13224835914554e-16	0.357566748344553	0.336	0.231	6.74185136822487e-12
ENSG00000166224	SGPL1	3.1789155979628e-16	-0.483935	0.071	0.151	6.84229793305513e-12
ENSG00000131507	NDFIP1	3.31812497809473e-16	0.453967729961893	0.162	0.086	7.1419322028511e-12
NA	C6orf48	3.3185228995139e-16	0.0606442568031269	0.233	0.139	7.14278868891371e-12
ENSG00000196591	HDAC2	3.3723326853142e-16	-0.44816	0.11	0.201	7.25860887187027e-12
ENSG00000102786	INTS6	3.51560360550233e-16	-0.400564	0.329	0.449	7.56698520048321e-12
ENSG00000165688	PMPCA	3.60321231450933e-16	-0.594142	0.143	0.238	7.75555418574989e-12
ENSG00000136536	2026-03-07	3.65818716649518e-16	-0.33695	0.621	0.702	7.87388205716423e-12
ENSG00000175105	ZNF654	3.7684527679265e-16	-0.580682	0.106	0.194	8.111217737685e-12
ENSG00000168894	RNF181	3.9624461288742e-16	-0.519964	0.373	0.471	8.52876904778883e-12
ENSG00000083845	RPS5	4.39983392924107e-16	0.102021812585638	0.843	0.819	9.47020254929849e-12
ENSG00000112697	TMEM30A	4.52841186793932e-16	-0.546676	0.201	0.299	9.7469537045526e-12
ENSG00000083896	YTHDC1	4.75532002780723e-16	-0.23022	0.582	0.659	1.02353508278523e-11
ENSG00000144747	TMF1	4.76341162435277e-16	-0.369426	0.15	0.248	1.02527671802569e-11
ENSG00000243927	MRPS6	4.85077424672454e-16	-0.51513	0.272	0.375	1.04408064886499e-11
ENSG00000092010	PSME1	4.87976428278037e-16	0.601412790031626	0.299	0.207	1.05032046422565e-11
ENSG00000163347	CLDN1	5.10970770182641e-16	-0.507853	0.325	0.423	1.09981348574112e-11
ENSG00000143368	SF3B4	5.42010846174139e-16	-0.309544	0.282	0.396	1.16662414530522e-11
ENSG00000146247	PHIP	5.49299753025648e-16	-0.287289	0.221	0.334	1.18231278841241e-11
ENSG00000137699	TRIM29	5.61090213929149e-16	-0.833828	0.102	0.184	1.2076905764611e-11
ENSG00000106803	SEC61B	5.64454400418944e-16	-0.304945	0.601	0.642	1.21493165146173e-11
ENSG00000155066	PROM2	5.76036231008003e-16	-0.816616	0.1	0.182	1.23986038362163e-11
ENSG00000153130	SCOC	5.76083273838653e-16	-0.466261	0.108	0.196	1.23996163861032e-11
ENSG00000100911	PSME2	5.98001595360189e-16	0.495947058390123	0.206	0.122	1.28713863385327e-11
ENSG00000136867	SLC31A2	6.50931775810231e-16	-0.429558	0.337	0.436	1.40106555425394e-11
ENSG00000145919	BOD1	6.71681482961875e-16	-0.818177	0.093	0.177	1.44572722392714e-11
ENSG00000135535	CD164	7.3194069134352e-16	-0.425665	0.261	0.369	1.57542914404779e-11
ENSG00000105321	CCDC9	7.47384043163259e-16	-0.522261	0.078	0.158	1.6086694145046e-11
ENSG00000256618	MTRNR2L1	7.48185077982558e-16	-1.0635	0.595	0.685	1.61039356184966e-11
ENSG00000136897	MRPL50	7.50784559087343e-16	-0.584045	0.108	0.197	1.6159886849796e-11
ENSG00000032219	ARID4A	7.76158983375994e-16	-0.640332	0.077	0.156	1.67060459581849e-11
ENSG00000198742	SMURF1	7.94333297016245e-16	-0.611066	0.146	0.24	1.70972298849777e-11
ENSG00000172765	TMCC1	7.99384015539946e-16	-0.895022	0.106	0.19	1.72059415504818e-11
ENSG00000158710	TAGLN2	8.10711182120835e-16	0.327881015949601	0.242	0.149	1.74497474839689e-11
ENSG00000101654	RNMT	8.76269171936975e-16	-0.323802	0.263	0.365	1.88608176567715e-11
ENSG00000066697	MSANTD3	9.0332618326084e-16	-0.883045	0.092	0.171	1.94431927685063e-11
ENSG00000089335	ZNF302	9.20047080769014e-16	0.298419364926902	0.284	0.19	1.98030933664723e-11
ENSG00000198218	QRICH1	9.5186687066847e-16	-0.427631	0.098	0.184	2.04879825242682e-11
ENSG00000054116	TRAPPC3	9.79500475853304e-16	-0.340166	0.223	0.328	2.10827682422665e-11
ENSG00000145741	BTF3	1.04904614134848e-15	-0.202511	0.761	0.79	2.25796691463847e-11
ENSG00000078269	SYNJ2	1.0521985742689e-15	0.631021544328252	0.189	0.111	2.26475221125639e-11
ENSG00000163512	AZI2	1.12959922877951e-15	-0.689014	0.11	0.196	2.43134938002503e-11
ENSG00000174106	LEMD3	1.16517732631362e-15	-0.700234	0.098	0.182	2.50792767715745e-11
ENSG00000283103	AC010642.2	1.22117809436344e-15	0.634245579898121	0.191	0.112	2.62846373030786e-11
ENSG00000105258	POLR2I	1.33220153228755e-15	0.326600550549472	0.172	0.094	2.86743057809572e-11
ENSG00000101928	MOSPD1	1.34134689829272e-15	-0.642772	0.11	0.195	2.88711506388526e-11
ENSG00000127526	SLC35E1	1.34592532782587e-15	-0.630828	0.103	0.188	2.89696967561239e-11
ENSG00000088833	NSFL1C	1.37011245897476e-15	-0.453165	0.102	0.188	2.94903005669728e-11
ENSG00000124789	NUP153	1.40945823716559e-15	-0.425215	0.135	0.231	3.03371790967521e-11
ENSG00000160439	RDH13	1.4591338301865e-15	-0.578953	0.231	0.327	3.14063965609342e-11
ENSG00000130787	HIP1R	1.53202982408665e-15	-0.473052	0.266	0.371	3.2975409933641e-11
ENSG00000132003	ZSWIM4	1.64442229816363e-15	-0.483344	0.252	0.357	3.53945455456741e-11
ENSG00000112406	HECA	1.92851724022033e-15	-0.327532	0.35	0.461	4.15094050785024e-11
ENSG00000095564	BTAF1	1.95215958336738e-15	-0.616887	0.106	0.191	4.20182828723994e-11
ENSG00000118246	FASTKD2	1.95425649776907e-15	-0.510801	0.086	0.167	4.20634168579815e-11
ENSG00000062650	WAPL	2.02869235938334e-15	-0.28601	0.158	0.261	4.3665574343367e-11
ENSG00000116285	ERRFI1	2.21876732416367e-15	-0.447067	0.34	0.443	4.77567478852987e-11
ENSG00000068308	OTUD5	2.26818053158663e-15	-0.387832	0.29	0.396	4.88203177618707e-11
ENSG00000125686	MED1	2.56813722175399e-15	-0.379344	0.115	0.205	5.52765855610328e-11
ENSG00000162458	FBLIM1	2.5892516905834e-15	0.648943602103107	0.169	0.094	5.57310533881171e-11
ENSG00000276023	DUSP14	2.62251809566493e-15	-0.28268	0.491	0.587	5.6447079491092e-11
ENSG00000169032	MAP2K1	2.70927963817104e-15	0.69218003267649	0.244	0.161	5.83145349319934e-11
ENSG00000119231	SENP5	2.8185609458658e-15	-0.345456	0.177	0.275	6.06667057988155e-11
ENSG00000070495	JMJD6	2.87735085553315e-15	-0.487456	0.246	0.346	6.19320998144956e-11
ENSG00000176407	KCMF1	2.94499941169846e-15	-0.474955	0.214	0.316	6.33881673373976e-11
ENSG00000012061	ERCC1	3.33889706759209e-15	0.450233384246132	0.386	0.3	7.18664204828521e-11
ENSG00000153827	TRIP12	3.37293956264045e-15	-0.422732	0.392	0.5	7.25991511462729e-11
ENSG00000057657	PRDM1	3.40517367217306e-15	-0.502549	0.448	0.539	7.32929581198529e-11
ENSG00000135211	TMEM60	3.47432448635837e-15	-0.684112	0.123	0.21	7.47813602443776e-11
ENSG00000085831	TTC39A	3.5601895722064e-15	-0.810197	0.078	0.152	7.66295203521705e-11
ENSG00000168564	CDKN2AIP	3.64770316529464e-15	-0.655818	0.109	0.195	7.85131629298019e-11
ENSG00000123374	CDK2	3.74201899130325e-15	-0.672852	0.086	0.166	8.05432167688112e-11
ENSG00000163807	KIAA1143	3.75704208179048e-15	-0.810294	0.085	0.164	8.08665737684584e-11
ENSG00000101182	PSMA7	3.83596651484066e-15	0.47760487359655	0.394	0.299	8.25653432654303e-11
ENSG00000066427	ATXN3	3.9692789527423e-15	-0.408755	0.083	0.162	8.54347601788252e-11
ENSG00000124614	RPS10	4.09952562206071e-15	-0.0227924	0.692	0.622	8.82381894892346e-11
ENSG00000148429	USP6NL	4.11294021757318e-15	-0.480735	0.168	0.261	8.85269252430451e-11
ENSG00000159346	ADIPOR1	4.12270639996216e-15	-0.29782	0.405	0.502	8.87371325527855e-11
ENSG00000166747	AP1G1	4.33719644247673e-15	-0.412109	0.242	0.346	9.33538162278692e-11
ENSG00000182208	MOB2	4.63523588543397e-15	-0.40556	0.299	0.403	9.97688171980808e-11
ENSG00000251247	ZNF345	4.68136142710369e-15	-0.620031	0.084	0.161	1.0076162335698e-10
ENSG00000160948	VPS28	4.76043100708802e-15	0.460258326883589	0.305	0.213	1.02463516996563e-10
ENSG00000108551	RASD1	4.77636591620635e-15	0.515038769067952	0.365	0.257	1.02806499980426e-10
NA	AC018797.2	4.80955702332149e-15	-0.444138	0.14	0.233	1.03520905369972e-10
ENSG00000114738	MAPKAPK3	4.87055911171286e-15	-0.559337	0.124	0.21	1.04833914320508e-10
ENSG00000105202	FBL	4.90954139653991e-15	0.390831171077676	0.15	0.079	1.05672969019125e-10
ENSG00000198492	YTHDF2	4.92276870032873e-15	-0.390482	0.229	0.332	1.05957673505876e-10
ENSG00000099940	SNAP29	4.98647482804331e-15	-0.554165	0.218	0.312	1.07328884198804e-10
ENSG00000132432	SEC61G	5.01528182486075e-15	0.339206753955949	0.66	0.593	1.07948925998303e-10
ENSG00000047849	MAP4	5.07901468307798e-15	0.485397408651574	0.154	0.083	1.0932071203857e-10
ENSG00000131018	SYNE1	5.4665047489813e-15	-0.676725	0.113	0.199	1.17661048217074e-10
ENSG00000119689	DLST	5.99683243160339e-15	-0.537303	0.205	0.302	1.29075821257831e-10
ENSG00000102897	LYRM1	6.15186731148932e-15	-0.491548	0.174	0.267	1.32412792012496e-10
ENSG00000140403	DNAJA4	7.10028047254791e-15	0.570384534900104	0.288	0.196	1.52826436891121e-10
ENSG00000073921	PICALM	7.12313077910656e-15	-0.424161	0.264	0.365	1.5331826688949e-10
ENSG00000110075	PPP6R3	7.20093381145003e-15	-0.48127	0.237	0.339	1.5499289935765e-10
ENSG00000165389	SPTSSA	8.05278505958137e-15	0.456833805714991	0.302	0.208	1.73328145622429e-10
ENSG00000102393	GLA	8.35929975248348e-15	0.729198373317455	0.253	0.171	1.79925567872454e-10
ENSG00000168303	MPLKIP	8.37772745961543e-15	-0.405108	0.229	0.328	1.80322205840762e-10
ENSG00000107968	MAP3K8	8.62083290978775e-15	-0.505638	0.295	0.386	1.85554807550272e-10
ENSG00000141867	BRD4	8.97346063623994e-15	-0.355965	0.252	0.365	1.93144766734428e-10
ENSG00000111481	COPZ1	9.90199819811219e-15	-0.364564	0.219	0.324	2.13130609216167e-10
ENSG00000188529	SRSF10	1.02516900617742e-14	-0.412864	0.249	0.349	2.20657376889628e-10
ENSG00000142230	SAE1	1.15931575904901e-14	-0.543859	0.088	0.166	2.49531123977708e-10
ENSG00000115484	CCT4	1.19541293194907e-14	-0.360057	0.4	0.498	2.57300679472717e-10
ENSG00000161011	SQSTM1	1.35995171560414e-14	-0.443658	0.665	0.724	2.92716007266635e-10
ENSG00000091039	OSBPL8	1.42793306950401e-14	-0.443725	0.138	0.227	3.07348313880044e-10
ENSG00000138095	LRPPRC	1.42901009565418e-14	-0.54867	0.077	0.154	3.07580132988606e-10
ENSG00000101166	PRELID3B	1.47188888124287e-14	-0.357307	0.468	0.561	3.16809362798716e-10
ENSG00000116604	MEF2D	1.47189661849854e-14	-0.515933	0.118	0.205	3.16811028165626e-10
NA	CTGF	1.53106045497629e-14	-0.996588	0.084	0.157	3.29545452329098e-10
ENSG00000168214	RBPJ	1.57678683889112e-14	-0.529895	0.158	0.249	3.39387599202925e-10
ENSG00000101413	RPRD1B	1.61759421967655e-14	-0.326174	0.078	0.156	3.4817097984318e-10
ENSG00000134294	SLC38A2	1.65846113771934e-14	-0.397942	0.327	0.433	3.56967175282711e-10
ENSG00000160588	MPZL3	1.69831500169612e-14	-0.350135	0.569	0.635	3.65545320965073e-10
ENSG00000128585	MKLN1	1.70479259251469e-14	-0.410577	0.112	0.198	3.66939557612863e-10
ENSG00000122482	ZNF644	1.74680331049558e-14	-0.37923	0.084	0.162	3.7598194455107e-10
ENSG00000136238	RAC1	1.80878803782224e-14	0.35509514012455	0.577	0.496	3.8932353726086e-10
ENSG00000110955	ATP5F1B	1.89343918743468e-14	-0.405168	0.375	0.466	4.0754385070344e-10
ENSG00000131236	CAP1	1.9094347298117e-14	0.404842436237269	0.415	0.333	4.1098673124467e-10
ENSG00000141682	PMAIP1	2.02880531641981e-14	-0.551727	0.451	0.525	4.36680056306201e-10
ENSG00000189159	JPT1	2.08272723625583e-14	-0.350494	0.692	0.732	4.48286210331705e-10
ENSG00000163875	MEAF6	2.16231107596932e-14	-0.547874	0.151	0.242	4.65415835991637e-10
ENSG00000172725	CORO1B	2.19135283791323e-14	0.797275588014268	0.166	0.095	4.71666784832444e-10
ENSG00000119537	KDSR	2.25699550697691e-14	-0.376437	0.192	0.292	4.85795712921709e-10
ENSG00000259153	AC004816.1	2.30865847937399e-14	-0.568582	0.218	0.31	4.96915651100458e-10
NA	C6orf106	2.42722535593286e-14	-0.398256	0.29	0.399	5.22435985610988e-10
ENSG00000051108	HERPUD1	2.46925005640437e-14	-0.486442	0.376	0.467	5.31481382140477e-10
ENSG00000198763	MT-ND2	2.58178613419799e-14	-0.0473494	0.964	0.931	5.55703647524776e-10
ENSG00000162434	JAK1	2.61447505474821e-14	-0.468096	0.184	0.28	5.62739610784004e-10
ENSG00000125652	ALKBH7	2.61692499673371e-14	0.712132188127172	0.186	0.113	5.63266936296965e-10
ENSG00000140598	EFL1	2.69795471078998e-14	-0.434142	0.092	0.171	5.80707771950436e-10
ENSG00000146963	LUC7L2	2.92860909242164e-14	-0.486771	0.076	0.152	6.30353821052835e-10
ENSG00000088930	XRN2	3.20232956811551e-14	-0.672466	0.082	0.157	6.89269416241182e-10
ENSG00000233461	AL445524.1	3.35904264145883e-14	1.11198375668918	0.21	0.135	7.23000338147599e-10
ENSG00000155096	AZIN1	3.57220586200714e-14	-0.587919	0.152	0.243	7.68881589738418e-10
ENSG00000108256	NUFIP2	3.64680094413606e-14	-0.478413	0.159	0.25	7.84937435215846e-10
ENSG00000183283	DAZAP2	4.03708611295874e-14	-0.263991	0.501	0.58	8.68942414953238e-10
ENSG00000175182	FAM131A	4.06540600424502e-14	-0.473693	0.097	0.173	8.75037988353698e-10
ENSG00000114209	PDCD10	4.13679741633709e-14	-0.414116	0.212	0.305	8.90404275892396e-10
ENSG00000137193	PIM1	4.16919242498711e-14	-0.821586	0.156	0.241	8.97376977554226e-10
ENSG00000198399	ITSN2	4.29465515159477e-14	-0.353663	0.359	0.457	9.24381574829258e-10
ENSG00000033800	PIAS1	4.32379417919541e-14	-0.531704	0.116	0.2	9.30653459130019e-10
ENSG00000136868	SLC31A1	4.363716113452e-14	-0.476931	0.266	0.365	9.39246256259408e-10
ENSG00000167723	TRPV3	4.64037518070142e-14	-0.422468	0.419	0.514	9.98794353894174e-10
ENSG00000112308	C6orf62	4.65743529863067e-14	-0.365296	0.366	0.461	1.00246637367726e-09
ENSG00000088247	KHSRP	5.0115983228863e-14	-0.574518	0.078	0.153	1.07869642301805e-09
ENSG00000100941	PNN	5.02482139253031e-14	-0.284006	0.154	0.249	1.08154255652822e-09
ENSG00000108946	PRKAR1A	5.06742311766818e-14	-0.440991	0.168	0.261	1.0907121518469e-09
ENSG00000114796	KLHL24	5.81147922261562e-14	-0.20056	0.274	0.389	1.25086278787579e-09
ENSG00000047346	FAM214A	6.64277404203165e-14	-0.472623	0.268	0.365	1.42979068480689e-09
ENSG00000174953	DHX36	6.9164627186151e-14	-0.331509	0.176	0.274	1.48869943555472e-09
ENSG00000114166	KAT2B	6.9581345058737e-14	-0.424606	0.189	0.282	1.49766887104425e-09
ENSG00000136021	SCYL2	7.11355501228105e-14	-0.335214	0.332	0.43	1.53112158084337e-09
ENSG00000114942	EEF1B2	7.24711466298626e-14	0.16727157999058	0.537	0.445	1.55986896006116e-09
ENSG00000172977	KAT5	7.91343176848857e-14	-0.635261	0.095	0.173	1.70328705384948e-09
ENSG00000124228	DDX27	8.48125289287938e-14	-0.458928	0.14	0.228	1.82550487266336e-09
ENSG00000189051	RNF222	9.90888382366501e-14	-0.577194	0.205	0.296	2.13278815420566e-09
ENSG00000066084	DIP2B	9.91783854222123e-14	-0.508711	0.105	0.185	2.1347155678277e-09
ENSG00000162852	CNST	1.0069958860808e-13	-0.454263	0.308	0.41	2.16745794520032e-09
ENSG00000006194	ZNF263	1.06697265749004e-13	-0.712726	0.082	0.155	2.29655194798156e-09
ENSG00000090382	LYZ	1.20235208626561e-13	-0.498016	0.258	0.154	2.58794263047811e-09
ENSG00000006459	KDM7A	1.21373120388756e-13	-0.606989	0.093	0.167	2.61243504324759e-09
ENSG00000090674	MCOLN1	1.2360509589145e-13	-0.196967	0.217	0.32	2.66047608396756e-09
ENSG00000170606	HSPA4	1.28810747711407e-13	-0.406364	0.11	0.193	2.77252253374032e-09
ENSG00000100380	ST13	1.29446524629479e-13	-0.370126	0.396	0.493	2.78620699612491e-09
ENSG00000105173	CCNE1	1.35100023160169e-13	-0.626735	0.085	0.157	2.90789289849948e-09
ENSG00000204569	PPP1R10	1.39503163061089e-13	-0.405582	0.225	0.322	3.00266608172688e-09
ENSG00000119335	SET	1.44445264457043e-13	-0.351385	0.352	0.45	3.10903987217338e-09
ENSG00000162961	DPY30	1.45729323476781e-13	0.671855875467553	0.157	0.089	3.13667795851424e-09
ENSG00000254505	CHMP4A	1.47486518228e-13	0.772433671402018	0.178	0.109	3.17449981833947e-09
ENSG00000163702	IL17RC	1.53417891907144e-13	-0.491964	0.091	0.166	3.30216670540938e-09
ENSG00000091436	MAP3K20	1.61693869448912e-13	-0.374859	0.344	0.435	3.48029884601838e-09
ENSG00000160584	SIK3	1.62055862976363e-13	-0.455565	0.182	0.276	3.48809039470323e-09
ENSG00000204463	BAG6	1.66152655476743e-13	-0.404255	0.234	0.331	3.57626975648141e-09
ENSG00000221869	CEBPD	1.69808154658068e-13	-0.642512	0.142	0.225	3.65495072086026e-09
ENSG00000119446	RBM18	1.70870709478224e-13	-0.465225	0.078	0.15	3.67782115080929e-09
ENSG00000179933	C14orf119	1.73235657986793e-13	-0.330001	0.169	0.259	3.72872430250774e-09
ENSG00000165775	FUNDC2	1.73554579089311e-13	-0.567086	0.141	0.225	3.73558876031833e-09
ENSG00000168488	ATXN2L	1.77588170961516e-13	-0.551108	0.097	0.174	3.82240779177567e-09
ENSG00000127022	CANX	1.96432870919765e-13	-0.423926	0.245	0.344	4.22802111367703e-09
ENSG00000110852	CLEC2B	2.04579204359173e-13	0.633035706823708	0.214	0.136	4.40336279462685e-09
ENSG00000067064	IDI1	2.07541857576555e-13	-0.411017	0.331	0.424	4.46713094247777e-09
ENSG00000066322	ELOVL1	2.09232795652742e-13	-0.54456	0.225	0.32	4.50352669362963e-09
ENSG00000137309	HMGA1	2.1193489609028e-13	-0.303478	0.457	0.547	4.56168670344718e-09
ENSG00000171862	PTEN	2.14774974033556e-13	-0.317475	0.097	0.175	4.62281654109827e-09
ENSG00000257949	TEN1	2.18395981696299e-13	-0.449505	0.264	0.358	4.70075511003114e-09
ENSG00000121741	ZMYM2	2.26574783114477e-13	-0.468172	0.089	0.165	4.87679563175601e-09
ENSG00000152234	ATP5F1A	2.28161014302163e-13	0.415090848388038	0.183	0.11	4.91093767183975e-09
ENSG00000139433	GLTP	2.31410812442808e-13	-0.425374	0.567	0.638	4.980886327019e-09
ENSG00000155438	NIFK	2.32387219708613e-13	-0.437171	0.089	0.165	5.00190251700819e-09
ENSG00000104375	STK3	2.42599509548899e-13	-0.577024	0.128	0.21	5.22171184353051e-09
ENSG00000143420	ENSA	2.56517679887253e-13	-0.240964	0.276	0.377	5.52128654189324e-09
ENSG00000006453	BAIAP2L1	2.6101195439227e-13	-0.930769	0.082	0.152	5.61802130633922e-09
ENSG00000133142	TCEAL4	2.66201168064319e-13	-0.455938	0.11	0.189	5.72971394141641e-09
ENSG00000104980	TIMM44	2.6770670433803e-13	-0.21592	0.151	0.244	5.76211910417176e-09
ENSG00000278845	MRPL45	2.85724477572688e-13	-0.368618	0.083	0.155	6.14993365527453e-09
ENSG00000118579	MED28	2.91258456857734e-13	-0.330144	0.264	0.367	6.26904702540586e-09
ENSG00000103194	USP10	2.92081986807933e-13	-0.512763	0.08	0.153	6.28677268405394e-09
ENSG00000008128	CDK11A	3.11808717828289e-13	-0.496215	0.108	0.187	6.7113708425361e-09
ENSG00000156467	UQCRB	3.14393939875062e-13	0.299500034009896	0.544	0.461	6.76701516187083e-09
ENSG00000163320	CGGBP1	3.25568989161975e-13	-0.452797	0.174	0.265	7.00754692272235e-09
ENSG00000003756	RBM5	3.30614984959209e-13	-0.370119	0.305	0.397	7.11615693626202e-09
ENSG00000168802	CHTF8	3.34464725179435e-13	-0.435714	0.179	0.27	7.19901874476215e-09
ENSG00000075711	DLG1	3.34582145462647e-13	-0.652346	0.079	0.15	7.20154609893802e-09
ENSG00000029364	SLC39A9	3.40111816077472e-13	-0.399748	0.241	0.331	7.32056672925151e-09
ENSG00000152520	PAN3	3.74121062670429e-13	-0.395136	0.198	0.291	8.05258175291831e-09
ENSG00000005893	LAMP2	3.90261347573281e-13	-0.443058	0.238	0.327	8.3999852451673e-09
ENSG00000155621	C9orf85	3.9958428508684e-13	-0.448533	0.114	0.193	8.60065215220913e-09
ENSG00000196743	GM2A	4.02518629553687e-13	-0.568049	0.367	0.453	8.66381098251356e-09
ENSG00000160712	IL6R	4.33551928107206e-13	-0.550826	0.159	0.244	9.3317717005795e-09
ENSG00000077549	CAPZB	4.34900440525067e-13	0.379437531514586	0.359	0.275	9.36079708186154e-09
ENSG00000176101	SSNA1	4.44655275258582e-13	0.349855899712164	0.192	0.118	9.57076014466571e-09
ENSG00000121316	PLBD1	4.93734584673183e-13	0.665015010165665	0.226	0.15	1.06271432005056e-08
ENSG00000156304	SCAF4	5.07838038751687e-13	-0.583081	0.105	0.183	1.09307059460913e-08
ENSG00000104408	EIF3E	5.12961111484112e-13	-0.338351	0.448	0.518	1.1040974963584e-08
ENSG00000261183	SPINT1-AS1	5.61015254886749e-13	-0.473715	0.136	0.218	1.20752923461824e-08
ENSG00000082258	CCNT2	5.62224432994069e-13	-0.357	0.102	0.18	1.21013186957643e-08
ENSG00000115641	FHL2	5.81917502571622e-13	-0.815519	0.183	0.267	1.25251923253516e-08
ENSG00000137747	TMPRSS13	5.95576553514433e-13	-0.483825	0.364	0.45	1.28191897378447e-08
ENSG00000168209	DDIT4	6.26699597068027e-13	0.484588721169944	0.35	0.26	1.34890821272922e-08
ENSG00000204178	MACO1	6.68329423300648e-13	-0.64235	0.168	0.251	1.43851225071231e-08
ENSG00000099804	CDC34	6.80468800593875e-13	-0.519686	0.32	0.406	1.46464104639826e-08
ENSG00000188612	SUMO2	6.87139325066677e-13	-0.241924	0.609	0.642	1.47899868327351e-08
ENSG00000122741	DCAF10	7.43629033879609e-13	-0.44093	0.108	0.187	1.60058713252247e-08
ENSG00000126777	KTN1	7.88817511856683e-13	-0.347139	0.25	0.347	1.69785081252032e-08
ENSG00000138592	USP8	8.0091025348052e-13	-0.238351	0.143	0.23	1.72387922959147e-08
ENSG00000197045	GMFB	8.3216768998602e-13	0.33024081396265	0.264	0.179	1.79115773592591e-08
ENSG00000172922	RNASEH2C	8.98577256926072e-13	0.746323080756188	0.192	0.122	1.93409768780768e-08
ENSG00000143222	UFC1	9.48470186130045e-13	-0.299767	0.381	0.475	2.04148722862631e-08
ENSG00000135334	AKIRIN2	9.50007992479867e-13	-0.353643	0.401	0.479	2.04479720301367e-08
ENSG00000102309	PIN4	9.88687749616699e-13	0.611221557260853	0.203	0.131	2.12805151227498e-08
ENSG00000104853	CLPTM1	1.00766103049672e-12	-0.307191	0.208	0.301	2.16888960204114e-08
ENSG00000223573	TINCR	1.0567307773724e-12	-0.385772	0.269	0.362	2.27450732521636e-08
ENSG00000084207	GSTP1	1.05886320191652e-12	0.193564799095037	0.677	0.604	2.27909715580512e-08
ENSG00000037241	RPL26L1	1.0628245298404e-12	-0.37882	0.148	0.232	2.28762351802847e-08
ENSG00000130766	SESN2	1.07241786325982e-12	-0.435814	0.236	0.329	2.30827220888044e-08
ENSG00000184897	H1FX	1.1338215703438e-12	0.281720292833701	0.461	0.362	2.440437548008e-08
ENSG00000101343	CRNKL1	1.16942081052951e-12	-0.529447	0.156	0.239	2.51706135258371e-08
ENSG00000109736	MFSD10	1.24873997657484e-12	0.613947935077391	0.172	0.105	2.68778792557968e-08
ENSG00000125944	HNRNPR	1.2511214479585e-12	-0.397138	0.106	0.183	2.69291380458587e-08
ENSG00000145337	PYURF	1.28064746072058e-12	0.578522017584343	0.179	0.11	2.75646559445497e-08
ENSG00000132507	EIF5A	1.34739302292976e-12	-0.350715	0.314	0.403	2.90012874255401e-08
ENSG00000185728	YTHDF3	1.44582688174332e-12	-0.416679	0.239	0.335	3.11199778026431e-08
ENSG00000152766	ANKRD22	1.454530325696e-12	-0.357771	0.324	0.41	3.13073107302808e-08
ENSG00000206503	HLA-A	1.47093180436453e-12	0.309595650353994	0.733	0.642	3.16603361571421e-08
ENSG00000152700	SAR1B	1.51263293245509e-12	-0.407747	0.277	0.364	3.25579112381634e-08
ENSG00000158406	HIST1H4H	1.53349349998454e-12	-0.447793	0.245	0.332	3.30069140936671e-08
ENSG00000143106	PSMA5	1.61650064409383e-12	-0.359744	0.165	0.251	3.47935598634756e-08
ENSG00000119414	PPP6C	1.68381849161417e-12	-0.332398	0.249	0.341	3.62425092135034e-08
ENSG00000163041	H3F3A	1.76368200824448e-12	-0.143016	0.82	0.846	3.79614915454542e-08
ENSG00000155265	GOLGA7B	1.78625253971822e-12	0.71703657212879	0.152	0.089	3.84472996648949e-08
ENSG00000135720	DYNC1LI2	1.87174599926163e-12	-0.384786	0.134	0.215	4.02874608881073e-08
ENSG00000184432	COPB2	1.93079206609056e-12	-0.298945	0.136	0.219	4.15583684305331e-08
ENSG00000108861	DUSP3	2.01622891322361e-12	-0.678174	0.107	0.182	4.3397311128225e-08
ENSG00000172939	OXSR1	2.04756924060773e-12	-0.39564	0.414	0.499	4.40718803348408e-08
ENSG00000059758	CDK17	2.08129717628699e-12	-0.30546	0.094	0.166	4.47978404224013e-08
ENSG00000122359	ANXA11	2.10378683103165e-12	0.429504138811566	0.426	0.348	4.52819077511253e-08
ENSG00000110367	DDX6	2.1259507425121e-12	-0.290943	0.338	0.441	4.57589637818305e-08
ENSG00000140157	NIPA2	2.26060043736192e-12	-0.274812	0.154	0.239	4.8657163813778e-08
ENSG00000163527	STT3B	2.29030606432467e-12	-0.439909	0.082	0.151	4.92965477285242e-08
ENSG00000205581	HMGN1	2.29590597527519e-12	-0.26362	0.45	0.528	4.94170802118233e-08
ENSG00000169398	PTK2	2.34570597700273e-12	-0.505256	0.118	0.197	5.04889754490069e-08
ENSG00000129250	KIF1C	2.35203310847196e-12	-0.5441	0.143	0.223	5.06251606267504e-08
ENSG00000066777	ARFGEF1	2.4418529973898e-12	-0.581922	0.086	0.156	5.25584439158181e-08
ENSG00000089693	MLF2	2.47864113710479e-12	-0.333478	0.257	0.349	5.33502718350435e-08
ENSG00000187555	USP7	2.53144351723829e-12	-0.579631	0.101	0.174	5.4486790265037e-08
ENSG00000140600	SH3GL3	2.71428191618982e-12	-0.684419	0.107	0.179	5.84222039640697e-08
ENSG00000100410	PHF5A	2.74085288819422e-12	-0.178732	0.188	0.279	5.89941175654923e-08
ENSG00000144228	SPOPL	2.77741413767593e-12	-0.409733	0.14	0.22	5.97810618993367e-08
ENSG00000140832	MARVELD3	2.84648866262124e-12	-0.456773	0.097	0.17	6.12678219742595e-08
ENSG00000116731	PRDM2	2.91730152357785e-12	-0.336573	0.208	0.301	6.27919979934897e-08
ENSG00000175137	SH3BP5L	2.92354114364743e-12	-0.492409	0.258	0.347	6.29262995758673e-08
ENSG00000112335	SNX3	3.07391648859677e-12	0.180465521383216	0.321	0.235	6.6162978500557e-08
ENSG00000125107	CNOT1	3.21744374751418e-12	-0.237285	0.203	0.3	6.92522592214952e-08
ENSG00000075426	FOSL2	3.22189855703116e-12	-0.247902	0.277	0.379	6.93481445415388e-08
ENSG00000183864	TOB2	3.47617929046649e-12	-0.429332	0.117	0.195	7.48212830480007e-08
ENSG00000006712	PAF1	3.56380783899664e-12	-0.752244	0.149	0.226	7.67073999265637e-08
ENSG00000060237	WNK1	3.5797623137809e-12	-0.313291	0.166	0.254	7.70508040418201e-08
ENSG00000140299	BNIP2	3.63004622274533e-12	-0.376056	0.161	0.245	7.81331148983704e-08
ENSG00000071537	SEL1L	3.63980034326903e-12	-0.548473	0.121	0.197	7.83430625885226e-08
ENSG00000162851	TFB2M	3.64194780661704e-12	-0.356052	0.138	0.219	7.83892845896252e-08
ENSG00000215717	TMEM167B	3.83555450343767e-12	-0.738274	0.093	0.161	8.25564751319923e-08
ENSG00000107745	MICU1	3.89591550945638e-12	-0.312358	0.246	0.339	8.38556854255392e-08
ENSG00000104388	RAB2A	4.10113281460311e-12	-0.378136	0.293	0.383	8.82727827015174e-08
ENSG00000161203	AP2M1	4.25289093929213e-12	0.338025258452181	0.191	0.121	9.15392245773237e-08
ENSG00000085433	WDR47	4.2950335309521e-12	-0.532048	0.108	0.183	9.2446301720213e-08
ENSG00000172965	MIR4435-2HG	4.54989461514711e-12	-0.662167	0.36	0.443	9.79319316964263e-08
ENSG00000123595	RAB9A	5.08098795106194e-12	-0.235923	0.309	0.403	1.09363184658657e-07
ENSG00000188554	NBR1	5.14031592393108e-12	-0.270824	0.148	0.233	1.10640159946693e-07
ENSG00000115875	SRSF7	5.58592193625699e-12	-0.267155	0.629	0.677	1.20231383755995e-07
ENSG00000173744	AGFG1	5.58921966192899e-12	-0.434545	0.132	0.213	1.2030236400336e-07
ENSG00000170802	FOXN2	5.85609287776492e-12	-0.638669	0.086	0.154	1.26046543101012e-07
ENSG00000096717	SIRT1	6.04712884547749e-12	-0.400811	0.372	0.457	1.30158401270058e-07
ENSG00000160058	BSDC1	6.17151768398614e-12	-0.260265	0.11	0.185	1.32835746630118e-07
ENSG00000111642	CHD4	6.25381092709076e-12	-0.402699	0.149	0.231	1.34607026394701e-07
ENSG00000130706	ADRM1	6.29898728727084e-12	-0.300324	0.273	0.371	1.35579402371218e-07
ENSG00000120688	WBP4	6.39421908059991e-12	-0.32009	0.128	0.209	1.37629171490833e-07
ENSG00000134851	TMEM165	6.39564133290069e-12	-0.340905	0.137	0.214	1.37659784049354e-07
ENSG00000175602	CCDC85B	6.43130880916998e-12	0.206966150961992	0.181	0.112	1.38427490808575e-07
ENSG00000198053	SIRPA	6.62313843093384e-12	0.643226379023123	0.15	0.088	1.4255643158742e-07
ENSG00000142546	NOSIP	6.88372264359012e-12	-0.33328	0.427	0.511	1.48165246180634e-07
ENSG00000166024	R3HCC1L	7.1628365351362e-12	-0.659487	0.171	0.253	1.54172893582272e-07
ENSG00000152558	TMEM123	7.22346406967581e-12	-0.381126	0.237	0.327	1.55477840635702e-07
ENSG00000213079	SCAF8	7.61148517090592e-12	-0.527622	0.102	0.175	1.63829606818579e-07
ENSG00000156599	ZDHHC5	7.85522863451702e-12	-0.536641	0.109	0.182	1.69075941129344e-07
ENSG00000122390	NAA60	7.96158466449249e-12	-0.443436	0.144	0.225	1.71365148318536e-07
ENSG00000132471	WBP2	8.16767940101454e-12	-0.404116	0.188	0.272	1.75801131427437e-07
ENSG00000106588	PSMA2	8.44422075018672e-12	-0.234238	0.255	0.352	1.81753407427019e-07
ENSG00000177733	HNRNPA0	8.97301671023245e-12	-0.349082	0.424	0.503	1.93135211671043e-07
ENSG00000081087	OSTM1	9.24903305301302e-12	-0.505665	0.232	0.317	1.99076187433052e-07
ENSG00000177150	FAM210A	9.25490632029962e-12	-0.394067	0.129	0.205	1.99202603638129e-07
ENSG00000131876	SNRPA1	9.49901132740093e-12	-0.285449	0.129	0.209	2.04456719810978e-07
ENSG00000147050	KDM6A	9.59920737635788e-12	-0.278283	0.214	0.308	2.06613339568727e-07
ENSG00000018408	WWTR1	9.63845539025568e-12	-0.493846	0.134	0.209	2.07458113819863e-07
ENSG00000104892	KLC3	9.71486291433295e-12	-0.373707	0.211	0.298	2.09102709368102e-07
ENSG00000105131	EPHX3	1.00025198727541e-11	-0.42305	0.275	0.358	2.1529423774116e-07
ENSG00000115839	RAB3GAP1	1.03818044857228e-11	-0.246701	0.277	0.373	2.23457959750698e-07
ENSG00000257621	PSMA3-AS1	1.03869920576566e-11	-0.177446	0.268	0.366	2.23569617049e-07
ENSG00000107679	PLEKHA1	1.09849227079976e-11	-0.375185	0.137	0.213	2.36439476366941e-07
ENSG00000058063	ATP11B	1.12350936242647e-11	-0.27763	0.158	0.24	2.41824155168672e-07
ENSG00000089737	DDX24	1.17606212596546e-11	-0.454997	0.145	0.226	2.53135611992807e-07
ENSG00000101193	GID8	1.24209156637495e-11	-0.435118	0.25	0.336	2.67347788746545e-07
ENSG00000074356	NCBP3	1.26177726569186e-11	-0.428662	0.108	0.179	2.71584938667516e-07
ENSG00000108061	SHOC2	1.32917127655258e-11	-0.410811	0.091	0.158	2.86090825565177e-07
ENSG00000115419	GLS	1.36385151279472e-11	-0.457496	0.223	0.31	2.93555399613936e-07
ENSG00000143751	SDE2	1.41110369488393e-11	-0.514183	0.137	0.215	3.03725959286818e-07
ENSG00000183172	SMDT1	1.46695112503284e-11	-0.342204	0.314	0.405	3.15746560152069e-07
ENSG00000144895	EIF2A	1.47333683438327e-11	-0.809382	0.085	0.151	3.17121020232656e-07
ENSG00000029153	ARNTL2	1.49066794506021e-11	-0.243147	0.327	0.419	3.2085136849476e-07
ENSG00000175793	SFN	1.51288964737304e-11	-0.573293	0.442	0.518	3.25634367700573e-07
ENSG00000180628	PCGF5	1.54371615743341e-11	-0.479186	0.097	0.166	3.32269465725967e-07
ENSG00000205544	TMEM256	1.57575654213660e-11	0.566803174613421	0.232	0.161	3.39165838129483e-07
[truncated: 430 more rows]
