# Supplementary material
Source: Research Square preprint supplement (doi:10.21203/rs.3.rs-9409744/v1)
Supplement: Supplementary file 2 [file f73f8fd75a73eb96019c4e06.xlsx]

## Sheet: PvsC_Cluster_T_cells_diff_all
Gene	Gene_name	p_val	avg_logFC	pct.1	pct.2	p_val_adj
ENSG00000211677	IGLC2	1.11613455749023e-29	6.31657805633903	0.467	0	2.40236802154196e-25
ENSG00000244094	SPRR2F	4.21630258101022e-23	5.9003707739017	0.385	0	9.0751696753664e-19
ENSG00000211895	IGHA1	1.49971275601535e-17	5.43422664889652	0.307	0	3.22798173604743e-13
ENSG00000211592	IGKC	6.59732972848863e-13	5.2341948726805	0.233	0	1.42000925075989e-08
ENSG00000203783	PRR9	3.01798307874026e-20	4.98130792964789	0.353	0.006	6.49590677868054e-16
ENSG00000132465	JCHAIN	5.84564467416675e-11	4.7029124831191	0.2	0	1.25821655966765e-06
ENSG00000229807	XIST	2.32789410795025e-19	3.98326255535664	0.343	0.006	5.01055927795212e-15
ENSG00000128383	APOBEC3A	2.12365878125754e-23	3.61608076814287	0.405	0.011	4.57096316077874e-19
ENSG00000163216	SPRR2D	5.17966823924573e-51	3.20297747908786	0.813	0.204	1.11487179181525e-46
ENSG00000124102	PI3	4.8785284718023e-41	3.10325572414727	0.725	0.171	1.05005446827073e-36
ENSG00000149968	MMP3	4.16851434458526e-11	3.04498871853157	0.221	0.011	8.97231027528532e-07
ENSG00000163993	S100P	4.59466462003744e-08	2.8158095930369	0.157	0.006	0.000988955612816859
ENSG00000160013	PTGIR	5.84999147951435e-21	2.49129253957898	0.42	0.05	1.25915216605067e-16
ENSG00000218537	MIF-AS1	4.65550017927298e-08	2.40857832062576	0.182	0.022	0.00100204985858672
ENSG00000186832	KRT16	3.77331845502434e-21	2.3620568077881	0.432	0.05	8.12169064259439e-17
ENSG00000188100	FAM25A	3.50636177047384e-25	2.28917663507832	0.592	0.182	7.54709307476789e-21
NA	LINC00302	1.00398402077765e-10	2.23742294946916	0.242	0.028	2.16097520632182e-06
ENSG00000266402	SNHG25	1.00168258283967e-11	2.17458647304906	0.273	0.039	2.15602159130411e-07
ENSG00000185479	KRT6B	5.87518561026264e-14	2.13366568160802	0.296	0.028	1.26457495075293e-09
ENSG00000166681	BEX3	2.18858900439693e-06	2.10398377852276	0.151	0.022	0.0471071897306395
ENSG00000167995	BEST1	1.64693864802964e-11	2.00317419534637	0.289	0.055	3.544870746019e-07
ENSG00000241794	SPRR2A	1.97943262131615e-38	1.98846493016154	0.846	0.387	4.26053077412088e-34
ENSG00000182853	VMO1	1.51767400152756e-08	1.92568137441323	0.22	0.039	0.000326664152088792
ENSG00000049768	FOXP3	2.25003713420329e-07	1.90167741090776	0.155	0.011	0.00484297992765916
NA	AC009501.1	5.33530001818596e-23	1.81747981700473	0.523	0.122	1.14836997591435e-18
ENSG00000129451	KLK10	1.24735034164236e-08	1.78064473345469	0.235	0.05	0.000268479687535101
ENSG00000196611	MMP1	2.00487347259835e-07	1.77401718787559	0.183	0.028	0.00431528966242069
ENSG00000205420	KRT6A	1.12230154737976e-11	1.68743247267553	0.279	0.039	2.4156418505802e-07
ENSG00000164308	ERAP2	7.40040876021677e-07	1.67055489637901	0.174	0.028	0.0159286398154906
ENSG00000185966	LCE3E	1.77452081628077e-15	1.66716472655412	0.567	0.287	3.81947860496273e-11
ENSG00000128422	KRT17	2.62813548411225e-19	1.56044757543158	0.665	0.376	5.65679881600321e-15
ENSG00000057149	SERPINB3	1.65251475593973e-10	1.55888360410237	0.333	0.099	3.55687276068467e-06
ENSG00000135245	HILPDA	1.95920949361e-10	1.54201272715828	0.28	0.055	4.21700251404616e-06
ENSG00000183760	ACP7	1.06458956986783e-06	1.50396476759185	0.215	0.061	0.0229142259018352
ENSG00000196805	SPRR2B	1.31669008368937e-14	1.46972766602239	0.621	0.376	2.83404373613299e-10
ENSG00000182463	TSHZ2	1.22685761238974e-08	1.45801919104449	0.248	0.055	0.000264068832490767
ENSG00000276900	AC023157.3	1.37434801510679e-12	1.45141693258445	0.366	0.099	2.95814666771585e-08
ENSG00000137642	SORL1	8.02242068108648e-12	1.44718565764346	0.394	0.138	1.72674582739705e-07
ENSG00000169871	TRIM56	8.5649742446629e-11	1.40541089695347	0.332	0.088	1.84352505642124e-06
ENSG00000171657	GPR82	3.40889524476827e-09	1.3848891814691	0.25	0.05	7.33730612483921e-05
ENSG00000152270	PDE3B	6.25996012768457e-08	1.38011224012059	0.221	0.044	0.00134739381788283
ENSG00000148671	ADIRF	4.89308996966626e-14	1.34719340785391	0.439	0.144	1.05318868507097e-09
ENSG00000102962	CCL22	1.67520900766964e-19	1.32941925899678	0.504	0.122	3.60571986810813e-15
ENSG00000132329	RAMP1	7.97001255594238e-07	1.31672610655186	0.227	0.066	0.0171546550254104
ENSG00000143546	S100A8	5.97734137318566e-15	1.28355881933979	0.938	0.619	1.28656295716448e-10
ENSG00000115602	IL1RL1	1.96515665574987e-10	1.18970996705051	0.382	0.138	4.22980318583601e-06
ENSG00000198223	CSF2RA	8.56200475106928e-09	1.17464887678828	0.315	0.105	0.000184288590262015
ENSG00000160991	ORAI2	7.05646076187532e-08	1.16337204185912	0.29	0.099	0.00151883261438604
ENSG00000124107	SLPI	9.91852980907378e-18	1.13508136194149	0.914	0.63	2.13486435610504e-13
ENSG00000223865	HLA-DPB1	1.70655570237874e-19	1.12858726912206	0.675	0.354	3.6731904938e-15
ENSG00000111913	RIPOR2	2.02763212409482e-07	1.08955158554773	0.297	0.105	0.00436427538390168
ENSG00000102970	CCL17	1.10969656777548e-08	1.05938830159955	0.321	0.116	0.000238851089247995
ENSG00000075618	FSCN1	5.49615561758204e-08	1.04470627047321	0.278	0.083	0.00118299253512836
ENSG00000188404	SELL	2.19968531340402e-12	1.02968266811453	0.378	0.099	4.7346026685708e-08
ENSG00000213928	IRF9	1.87403666810999e-08	1.02644182370293	0.287	0.083	0.000403367652443995
ENSG00000159069	FBXW5	1.18071528019709e-07	1.02277298745731	0.316	0.116	0.00254137156909622
ENSG00000214087	ARL16	1.06109397095515e-07	1.02139797142804	0.316	0.122	0.00228389866308387
ENSG00000160213	CSTB	9.64623897612217e-22	1.02093566119647	0.833	0.591	2.07625647722054e-17
ENSG00000189306	RRP7A	6.26179972496459e-08	1.00925247503861	0.322	0.116	0.00134778977280138
ENSG00000005844	ITGAL	5.0714671566599e-07	0.970116471215115	0.282	0.094	0.0109158259079948
ENSG00000115523	GNLY	2.66464616285376e-07	0.966096408009749	0.234	0.061	0.00573538440092643
ENSG00000169469	SPRR1B	8.44169598523344e-07	0.941465985370343	0.859	0.746	0.0181699064386165
ENSG00000186827	TNFRSF4	4.88991017210449e-07	0.92739985953519	0.286	0.105	0.0105250426544377
ENSG00000165799	RNASE7	1.05484238815716e-09	0.920392811294145	0.544	0.32	2.27044275626948e-05
ENSG00000140519	RHCG	8.58487458723534e-07	0.919554072803594	0.35	0.166	0.0184780840615653
ENSG00000002933	TMEM176A	1.58354175881891e-09	0.899167128160639	0.233	0.033	3.40841528168183e-05
ENSG00000267100	ILF3-DT	3.41653415196941e-11	0.89329962759221	0.429	0.166	7.35374810869895e-07
ENSG00000267121	AC008105.3	4.68469865733469e-08	0.892229913666456	0.317	0.11	0.00100833453900472
ENSG00000267680	ZNF224	2.72066111545082e-07	0.891567524828485	0.304	0.11	0.00585595098489635
ENSG00000175567	UCP2	4.16107391878446e-07	0.883583738026323	0.321	0.127	0.00895629550279168
ENSG00000142347	MYO1F	8.91468585381214e-13	0.858329103309114	0.597	0.304	1.91879698317452e-08
ENSG00000198695	MT-ND6	3.19888366044495e-08	0.84150776982307	0.416	0.193	0.000688527719074171
ENSG00000162894	FCMR	1.31367666605484e-06	0.838197784536762	0.249	0.083	0.0282755765601643
ENSG00000123595	RAB9A	1.25100706411635e-06	0.835135389353911	0.252	0.083	0.0269266760480402
ENSG00000127528	KLF2	1.78952587268369e-09	0.829391966226232	0.347	0.105	3.85177548836438e-05
ENSG00000184922	FMNL1	1.12955390761958e-09	0.799362227791256	0.496	0.232	2.43125183076038e-05
ENSG00000186470	BTN3A2	1.33714386632983e-09	0.792633363808376	0.482	0.238	2.87806845788832e-05
ENSG00000144028	SNRNP200	1.23837671474129e-06	0.783617029471793	0.323	0.138	0.0266548204080915
ENSG00000160613	PCSK7	1.64184866449449e-13	0.78289161688428	0.65	0.365	3.53391506545795e-09
ENSG00000081059	TCF7	2.05014488044298e-07	0.765049268906096	0.432	0.227	0.00441273184066548
ENSG00000153048	CARHSP1	1.84179606360534e-08	0.764816073637638	0.43	0.188	0.000396428184730414
ENSG00000225783	MIAT	6.17179225927603e-09	0.738217047779216	0.441	0.182	0.000132841656588657
ENSG00000025800	KPNA6	4.19784591789033e-07	0.737370260575917	0.263	0.077	0.00903544355366714
ENSG00000139433	GLTP	3.83968100121253e-10	0.730804620851665	0.596	0.337	8.26452938700986e-06
ENSG00000204592	HLA-E	5.88441713086072e-30	0.729702665522846	0.957	0.79	1.26656194324646e-25
ENSG00000099337	KCNK6	1.55836804795563e-07	0.723070092038255	0.288	0.094	0.0033542313864197
ENSG00000066294	CD84	1.75355628222708e-07	0.707220923206333	0.42	0.199	0.00377435454186556
ENSG00000254505	CHMP4A	4.9036151786849e-09	0.699534282814405	0.551	0.287	0.000105545413106014
ENSG00000148362	PAXX	3.43163403946907e-07	0.665496784997216	0.409	0.199	0.00738624910655322
ENSG00000198727	MT-CYB	2.00412695554532e-36	0.665065979036549	0.987	0.906	4.31368285911576e-32
ENSG00000185811	IKZF1	5.33351419583194e-13	0.663023798079928	0.739	0.497	1.14798559551087e-08
ENSG00000213676	ATF6B	1.42067626183121e-06	0.652362018918926	0.419	0.215	0.030578635859655
ENSG00000198804	MT-CO1	8.5242994632039e-34	0.643788918019136	0.993	0.939	1.83477021646001e-29
ENSG00000139193	CD27	2.39906482533442e-08	0.639489444676617	0.426	0.177	0.000516374713004981
ENSG00000019582	CD74	4.13955673298003e-20	0.633439564685443	0.886	0.746	8.90998191206622e-16
ENSG00000198771	RCSD1	2.51149856852468e-07	0.60828221062682	0.551	0.337	0.00540574951889253
ENSG00000164733	CTSB	1.57865249361089e-06	0.604448129449477	0.395	0.188	0.0339789162724808
ENSG00000198888	MT-ND1	1.42154302674762e-31	0.599957492254431	0.99	0.878	3.05972921077157e-27
ENSG00000231389	HLA-DPA1	9.7205883117451e-07	0.595182030771902	0.508	0.32	0.0209225942822001
ENSG00000198840	MT-ND3	1.70710540947989e-28	0.572002411553295	0.994	0.856	3.67437368336451e-24
ENSG00000108639	SYNGR2	1.26295021554222e-06	0.563883774008515	0.359	0.171	0.0271837404393307
ENSG00000087086	FTL	6.32536220397062e-54	0.543196439783439	1	0.983	1.36147096078264e-49
ENSG00000105701	FKBP8	7.23584299517439e-07	0.541814170146849	0.555	0.354	0.0155744284628134
NA	SEPT6	2.56210158005586e-07	0.536110235060532	0.501	0.271	0.00551466744091222
ENSG00000181847	TIGIT	1.23651106014389e-07	0.515984619535568	0.383	0.155	0.0026614664058537
ENSG00000198712	MT-CO2	4.74792012601478e-29	0.510986892337173	0.994	0.928	1.02194232792342e-24
NA	POLR2J3.1	5.01176928006667e-08	0.497978789235305	0.711	0.492	0.00107873321984155
ENSG00000198763	MT-ND2	5.86287189180886e-25	0.486949504154483	0.996	0.934	1.26192454599294e-20
ENSG00000111716	LDHB	1.65148309604155e-07	0.472636054096153	0.723	0.541	0.00355465221591982
ENSG00000167658	EEF2	1.90369525915293e-10	0.419485858212796	0.917	0.807	4.09751367580076e-06
ENSG00000174444	RPL4	2.66471272333038e-18	0.391297524234461	0.988	0.912	5.7355276656963e-14
ENSG00000198886	MT-ND4	8.31179738215733e-23	0.390310203715678	0.995	0.917	1.78903126853554e-18
ENSG00000011600	TYROBP	4.85729526933025e-08	0.389573982399878	0.381	0.155	0.00104548423377064
ENSG00000198899	MT-ATP6	6.0328191409359e-23	0.385289568395377	0.986	0.89	1.29850399189504e-18
ENSG00000175130	MARCKSL1	2.1847049534029e-06	0.376618068091762	0.472	0.249	0.047023589417044
NA	AES	3.10886570682521e-08	0.373177652487837	0.763	0.53	0.000669152254737058
ENSG00000130066	SAT1	4.31251137067507e-16	0.371586930559145	0.811	0.497	9.28224947424102e-12
ENSG00000167468	GPX4	3.84932650335282e-07	0.371446172600602	0.782	0.586	0.0082852903658166
ENSG00000179144	GIMAP7	1.13780408072795e-06	0.370959054124615	0.681	0.47	0.0244900950335883
ENSG00000167996	FTH1	6.91977597951706e-30	0.29550393009362	0.999	0.983	1.48941258183125e-25
ENSG00000198034	RPS4X	3.06198088363483e-17	0.295006619260167	0.998	0.967	6.59060765393561e-13
ENSG00000198938	MT-CO3	1.01397075791045e-14	0.287033069683339	0.993	0.917	2.18247065932645e-10
ENSG00000108518	PFN1	1.30751938609052e-07	0.256868982287484	0.975	0.912	0.00281430472662122
ENSG00000142534	RPS11	3.16238785861335e-07	0.216182207575085	0.981	0.923	0.00680672362687937
ENSG00000145425	RPS3A	4.0341693600083e-11	0.21380685954737	0.997	0.978	8.68314613048186e-07
ENSG00000034510	TMSB10	2.02328675988925e-12	0.212854637185114	0.999	0.983	4.35492242198561e-08
ENSG00000126353	CCR7	2.16691498011644e-08	0.209010616963787	0.453	0.221	0.000466406780320262
ENSG00000104904	OAZ1	9.40205094144142e-08	0.200259764342159	0.967	0.895	0.00202369744463585
ENSG00000271503	CCL5	3.95373009574592e-09	0.161707170276753	0.732	0.425	8.51000865808352e-05
ENSG00000156508	EEF1A1	1.94910224571715e-08	0.147093275287024	0.999	0.983	0.00041952476736816
ENSG00000204287	HLA-DRA	9.13277484414525e-11	0.131378922742013	0.679	0.442	1.96573845745382e-06
ENSG00000255823	MTRNR2L8	1.17030258195272e-15	0.105943009271017	0.894	0.652	2.51895927739503e-11
ENSG00000245532	NEAT1	1.67073091361797e-09	0.0939153740982013	0.961	0.895	3.59608121847131e-05
ENSG00000256045	MTRNR2L10	8.04283766383811e-07	0.0876077619460567	0.497	0.276	0.0173114037876451
ENSG00000136810	TXN	1.1163010031035e-07	0.00919619486166079	0.857	0.724	0.00240272627907998
ENSG00000165949	IFI27	3.58810920776652e-09	-0.0266198	0.428	0.193	7.72304625879667e-05
ENSG00000229117	RPL41	3.95771429148988e-10	-0.135799	1	1	8.51858424100281e-06
ENSG00000182899	RPL35A	2.94955011363156e-07	-0.158813	0.998	0.989	0.00634861166458056
ENSG00000071082	RPL31	4.74122971127053e-07	-0.160463	0.995	0.978	0.0102050228305387
ENSG00000145592	RPL37	1.6100488411227e-06	-0.162032	0.998	0.983	0.0346546912563251
ENSG00000108107	RPL28	1.33263644552645e-10	-0.178821	0.999	0.972	2.86836668535114e-06
ENSG00000161970	RPL26	5.40829964160461e-11	-0.184668	0.996	0.983	1.16408241485898e-06
ENSG00000122026	RPL21	1.09994760148792e-10	-0.193998	0.999	0.989	2.3675272174426e-06
ENSG00000172809	RPL38	3.08791824218275e-10	-0.235034	0.984	0.978	6.64643522447415e-06
ENSG00000188846	RPL14	1.74138241613829e-11	-0.236192	0.99	0.972	3.74815151249606e-07
ENSG00000187514	PTMA	7.32146994690647e-14	-0.275373	0.994	0.983	1.57587319137215e-09
ENSG00000124614	RPS10	2.89756795910271e-12	-0.334363	0.962	0.928	6.23672527517268e-08
ENSG00000197958	RPL12	2.1794602939351e-19	-0.344209	0.995	0.961	4.69107033666592e-15
ENSG00000206503	HLA-A	1.44029213742168e-07	-0.350634	0.964	0.939	0.00310008479658642
ENSG00000156467	UQCRB	7.30171903096392e-10	-0.358949	0.857	0.878	1.57162200422468e-05
ENSG00000114391	RPL24	8.81046050973198e-12	-0.375302	0.967	0.956	1.89636352011471e-07
ENSG00000197956	S100A6	4.60635946483969e-08	-0.390108	0.976	0.945	0.000991472811212095
ENSG00000122566	HNRNPA2B1	1.02728773839737e-06	-0.459716	0.593	0.724	0.0221113412812649
ENSG00000096384	HSP90AB1	2.25507907342063e-07	-0.472798	0.553	0.696	0.00485383219763056
ENSG00000136156	ITM2B	3.67246320479335e-11	-0.472848	0.778	0.873	7.9046098019972e-07
ENSG00000132475	H3F3B	7.74764244580936e-13	-0.498098	0.914	0.939	1.66760256003601e-08
ENSG00000100650	SRSF5	8.63216868341248e-07	-0.502291	0.608	0.702	0.018579879874177
ENSG00000122862	SRGN	5.61329672811491e-07	-0.540451	0.759	0.768	0.0120820598775945
ENSG00000002586	CD99	1.28921401679462e-06	-0.551092	0.543	0.646	0.0277490424974873
ENSG00000213719	CLIC1	6.86423676980602e-08	-0.56887	0.472	0.613	0.00147745832233305
ENSG00000150991	UBC	1.16459223122467e-10	-0.571052	0.92	0.945	2.50666831848797e-06
ENSG00000132965	ALOX5AP	2.87651374466995e-07	-0.578647	0.507	0.608	0.0061914081840276
ENSG00000185862	EVI2B	4.88279459517469e-08	-0.584717	0.429	0.58	0.0010509727086654
ENSG00000117450	PRDX1	2.63595221404871e-07	-0.598219	0.416	0.575	0.00567362354551844
ENSG00000137876	RSL24D1	6.03470036732252e-08	-0.621708	0.435	0.58	0.0012989089070625
ENSG00000154582	ELOC	2.104615529935e-06	-0.648847	0.453	0.569	0.045299744666321
NA	SEPT7	3.76106104082514e-09	-0.653542	0.409	0.586	8.09530778427203e-05
ENSG00000123416	TUBA1B	5.9970910906744e-07	-0.662595	0.404	0.53	0.0129081388635676
ENSG00000197747	S100A10	8.60788076929964e-19	-0.687988	0.781	0.89	1.85276025678406e-14
ENSG00000102007	PLP2	3.0444863726115e-09	-0.692613	0.486	0.63	6.55295246840899e-05
ENSG00000026025	VIM	4.03915673325982e-14	-0.70363	0.81	0.862	8.69388095266843e-10
ENSG00000081154	PCNP	8.44573179831199e-07	-0.707351	0.342	0.486	0.0181785931226867
ENSG00000170571	EMB	1.26590459578756e-07	-0.711052	0.282	0.436	0.00272473305197314
ENSG00000081237	PTPRC	1.25635576644059e-16	-0.747156	0.658	0.801	2.70418015168673e-12
ENSG00000153113	CAST	1.18446172303983e-07	-0.753192	0.284	0.448	0.00254943541267094
ENSG00000135046	ANXA1	1.77139937303903e-10	-0.755503	0.62	0.735	3.81276001052921e-06
ENSG00000100219	XBP1	3.29071340159331e-08	-0.760317	0.276	0.448	0.000708293152558944
ENSG00000143256	PFDN2	1.22656389245328e-06	-0.761178	0.346	0.486	0.0264005612211644
ENSG00000137575	SDCBP	5.48113284417313e-08	-0.7749	0.223	0.392	0.00117975903337982
ENSG00000155307	SAMSN1	7.91786978323283e-09	-0.778145	0.413	0.564	0.000170424229214304
ENSG00000175315	CST6	8.66021700407352e-16	-0.789698	0.346	0.685	1.86402510795679e-11
ENSG00000185201	IFITM2	1.96914308358906e-09	-0.791359	0.545	0.635	4.23838357311709e-05
ENSG00000144426	NBEAL1	1.11574136193065e-06	-0.805982	0.168	0.309	0.0240152170741952
ENSG00000160593	JAML	8.41381081054036e-10	-0.81486	0.385	0.575	1.81098863886071e-05
ENSG00000121552	CSTA	2.31986504274453e-13	-0.818834	0.551	0.757	4.99327751800333e-09
ENSG00000113580	NR3C1	5.90223756476105e-08	-0.837476	0.263	0.425	0.00127039761343917
ENSG00000163565	IFI16	1.08382494599975e-06	-0.842379	0.304	0.453	0.0233282481376986
ENSG00000128272	ATF4	3.55851495441376e-09	-0.865332	0.546	0.674	7.65934758788017e-05
ENSG00000062194	GPBP1	8.72943183269466e-09	-0.897409	0.278	0.448	0.00018789229076692
ENSG00000099860	GADD45B	2.79472148897783e-13	-0.89912	0.528	0.746	6.01535853287587e-09
ENSG00000184292	TACSTD2	4.56468151141549e-09	-0.945625	0.356	0.547	9.82502048517069e-05
ENSG00000171476	HOPX	9.80314170108077e-18	-0.954244	0.361	0.646	2.11002821974062e-13
ENSG00000148175	STOM	5.11998357434576e-07	-0.963918	0.13	0.265	0.0110202526454218
ENSG00000164323	CFAP97	2.48123366581125e-07	-0.967233	0.07	0.188	0.00534060734229213
ENSG00000087074	PPP1R15A	7.98557908909283e-07	-1.02489	0.347	0.492	0.0171881604313634
ENSG00000171867	PRNP	4.16469717079861e-11	-1.02871	0.226	0.431	8.96409419042692e-07
ENSG00000165169	DYNLT3	4.97093002023018e-08	-1.04315	0.118	0.26	0.00106994297755434
ENSG00000273319	AC058791.1	1.16145515914474e-06	-1.0462	0.117	0.243	0.0249991608454314
ENSG00000100906	NFKBIA	2.33859413876229e-15	-1.04666	0.458	0.702	5.03359002427196e-11
ENSG00000141543	EIF4A3	1.0369816844896e-06	-1.07448	0.153	0.287	0.0223199937769541
ENSG00000165997	ARL5B	8.19547282068631e-07	-1.09507	0.088	0.204	0.0176399356992452
ENSG00000197728	RPS26	1.31859183117771e-73	-1.12954	0.9	0.967	2.8381370574269e-69
ENSG00000005001	PRSS22	7.60684059528674e-10	-1.13152	0.103	0.265	1.63729636972952e-05
ENSG00000133641	C12orf29	1.85497946843527e-07	-1.18972	0.063	0.177	0.00399265780786007
ENSG00000221946	FXYD7	9.24247475900335e-08	-1.21535	0.095	0.227	0.00198935026712788
ENSG00000178372	CALML5	8.95030346329258e-22	-1.22528	0.235	0.558	1.9264633174391e-17
ENSG00000171522	PTGER4	1.82982298175857e-10	-1.24582	0.096	0.26	3.93851098593715e-06
ENSG00000110848	CD69	5.29588040260337e-08	-1.25847	0.093	0.227	0.00113988529785635
ENSG00000100376	FAM118A	8.2933137211316e-09	-1.29442	0.072	0.204	0.000178505284533637
ENSG00000140092	FBLN5	2.08484347098332e-08	-1.30338	0.058	0.177	0.000448741708694449
ENSG00000137331	IER3	4.12282264675099e-17	-1.40236	0.2	0.464	8.87396346486683e-13
ENSG00000010278	CD9	3.85185913316891e-10	-1.43022	0.072	0.215	8.29074159823275e-06
ENSG00000155090	KLF10	5.03251470227052e-08	-1.44073	0.073	0.199	0.00108319846451671
ENSG00000206560	ANKRD28	4.43322205408446e-14	-1.62996	0.072	0.249	9.54206714921139e-10
ENSG00000108244	KRT23	1.06356962347755e-25	-1.74421	0.143	0.453	2.28922725757309e-21
ENSG00000120885	CLU	2.87123159993414e-15	-1.74441	0.06	0.238	6.18003889569825e-11
ENSG00000186594	MIR22HG	1.09442991580276e-08	-1.7604	0.044	0.155	0.000235565095077387
ENSG00000116741	RGS2	8.5468565758404e-16	-1.85021	0.084	0.282	1.83962540938389e-11
ENSG00000143882	ATP6V1C2	6.5524279338403e-13	-1.91064	0.039	0.177	1.41034458847979e-08
ENSG00000256618	MTRNR2L1	7.03130586185231e-15	-2.16246	0.162	0.376	1.51341827370509e-10
ENSG00000126709	IFI6	3.02446921762533e-07	-2.30276	0.081	0.199	0.00650986754401676
ENSG00000198692	EIF1AY	4.76796038926485e-26	-2.38668	0.012	0.177	1.02625579418537e-21
ENSG00000169242	EFNA1	7.30074793603229e-23	-2.67945	0.025	0.204	1.57141298575159e-18
ENSG00000115009	CCL20	3.83044399680496e-63	-2.79415	0.075	0.536	8.24464765872301e-59
ENSG00000197943	PLCG2	2.36312207479576e-12	-2.89239	0.038	0.171	5.08638395379038e-08
ENSG00000129824	RPS4Y1	3.45414585439134e-150	-3.06217	0.044	0.845	7.43470353699192e-146
ENSG00000244734	HBB	2.48900426089839e-27	-3.18157	0.015	0.193	5.35733277115769e-23
ENSG00000133710	SPINK5	2.61077925929966e-37	-3.19228	0.015	0.243	5.6194412777166e-33
ENSG00000137077	CCL21	1.02481812388151e-38	-4.70621	0.005	0.204	2.20581852984255e-34
