# Supplementary material
Source: Research Square preprint supplement (doi:10.21203/rs.3.rs-9409744/v1)
Supplement: Supplementary file 3 [file fa0b202b6cc6a0ede7dccec8.xlsx]

## Sheet: celltype_alltop_marker
Gene	Gene_name	cluster	avg_logFC	p_val	p_val_adj	pct.1	pct.2
ENSG00000237541	HLA-DQA2	DC	3.73657851095837	0	0	0.732	0.039
ENSG00000173404	INSM1	DC	3.40991211337151	0	0	0.603	0.013
ENSG00000229425	AJ009632.2	DC	3.6600446409192	0	0	0.406	0.003
NA	DLEU7-AS1	DC	4.24131786448974	0	0	0.268	0.001
ENSG00000267107	PCAT19	Endothelial_cell	4.30223962920615	0	0	0.367	0.011
ENSG00000131477	RAMP2	Endothelial_cell	4.08792437877798	0	0	0.322	0.014
ENSG00000172889	EGFL7	Endothelial_cell	4.45309119803983	6.05308004777656e-275	1.30286494948343e-270	0.287	0.013
ENSG00000262202	AC007952.4	Endothelial_cell	4.06118583896476	2.35306615929948e-176	5.06473960127619e-172	0.284	0.023
ENSG00000169474	SPRR1A	Keratinocytes	3.50808063190224	0	0	0.488	0.059
ENSG00000133710	SPINK5	Keratinocytes	3.42972755077702	0	0	0.605	0.192
ENSG00000275216	AL161431.1	Keratinocytes	3.52265922189906	0	0	0.344	0.042
ENSG00000198092	TMPRSS11F	Keratinocytes	3.39727891242551	7.73420631937877e-298	1.66471056818309e-293	0.29	0.015
ENSG00000165168	CYBB	Macrophage	5.45088774077661	0	0	0.81	0.005
ENSG00000182578	CSF1R	Macrophage	5.48450278269843	0	0	0.614	0.004
ENSG00000163735	CXCL5	Macrophage	5.83428362285311	0	0	0.595	0.018
ENSG00000155659	VSIG4	Macrophage	5.44546227760451	0	0	0.392	0.003
ENSG00000080166	DCT	Melanocytes	4.93886043139949	0	0	0.831	0.106
ENSG00000092529	CAPN3	Melanocytes	4.86666556699208	0	0	0.39	0.004
ENSG00000125851	PCSK2	Melanocytes	4.77698451589447	0	0	0.385	0.003
ENSG00000071991	CDH19	Melanocytes	4.8212586181042	0	0	0.32	0.002
ENSG00000143184	XCL1	NK	5.28209995921183	0	0	0.79	0.014
ENSG00000242258	LINC00996	NK	5.36480539364586	0	0	0.738	0.006
ENSG00000143185	XCL2	NK	5.07369543214839	0	0	0.598	0.01
ENSG00000128040	SPINK2	NK	4.4291597340616	0	0	0.524	0.015
ENSG00000160654	CD3G	T_cells	3.74613950048714	0	0	0.576	0.031
ENSG00000172575	RASGRP1	T_cells	3.29052548577278	0	0	0.296	0.023
ENSG00000163564	PYHIN1	T_cells	3.2708152291367	0	0	0.274	0.018
ENSG00000113088	GZMK	T_cells	3.46148242751384	0	0	0.256	0.028
